# Supplementary material for: Dendrimers Functionalized with Palladium Complexes of N-, N,N-, and N,N,N-Ligands
Source: MDPI journal article supplement (doi:10.3390/molecules26082333), 2021-04-17
Supplement: s1 [file s1]

## Supporting information belonging to the paper

### Dendrimers Functionalized with Palladium Complexes of N-, N,N-, and N,N,N-Ligands

Quentin Vanbellingen, Paul Servin, Anaïs Coinaud, Sonia Mallet-Ladeira, Régis Laurent, Anne-Marie Caminade\*

#### Table of contents

|                                                                |     |
|----------------------------------------------------------------|-----|
| <sup>1</sup> H NMR of Compound <b>2</b>                        | S3  |
| <sup>1</sup> H COSY NMR of Compound <b>2</b>                   | S4  |
| <sup>1</sup> H TOCSY NMR of Compound <b>2</b>                  | S5  |
| <sup>1</sup> C { <sup>2</sup> H} NMR of Compound <b>2</b>      | S6  |
| <sup>33</sup> C JMOD NMR of Compound <b>2</b>                  | S7  |
| <sup>4</sup> C DEPT NMR of Compound <b>2</b>                   | S8  |
| <sup>5</sup> C HMBC NMR of Compound <b>2</b>                   | S9  |
| <sup>63</sup> C HMQC NMR of Compound <b>2</b>                  | S10 |
| <sup>7</sup> H NMR of Compound <b>2a</b>                       | S11 |
| <sup>8</sup> C { <sup>1</sup> H} NMR of Compound <b>2a</b>     | S12 |
| <sup>9</sup> C JMOD NMR of Compound <b>2a</b>                  | S13 |
| <sup>10</sup> C HMQC NMR of Compound <b>2a</b>                 | S14 |
| <sup>11</sup> H NMR of Compound <b>2a-Pd</b>                   | S15 |
| <sup>12</sup> C { <sup>1</sup> H} NMR of Compound <b>2a-Pd</b> | S16 |
| <sup>13</sup> C HMQC NMR of Compound <b>2a-Pd</b>              | S17 |
| <sup>1</sup> H NMR of Compound <b>3</b>                        | S18 |
| <hr/>                                                          |     |
| <sup>1</sup> C{ <sup>1</sup> H} NMR of Compound <b>3a-Pd</b>   | S29 |
| <sup>2</sup> H NMR of Compound <b>4</b>                        | S30 |
| <sup>3</sup> H COSY NMR of Compound <b>4</b>                   | S31 |
| <sup>4</sup> C{ <sup>1</sup> H} NMR of Compound <b>4</b>       | S32 |
| <sup>5</sup> C HMQC NMR of Compound <b>4</b>                   | S33 |
| <sup>13</sup> C HMQC long range NMR of Compound <b>4</b>       | S34 |
| <sup>6</sup> H NMR of Compound <b>5</b>                        | S35 |
| <sup>7</sup> H COSY NMR of Compound <b>5</b>                   | S36 |
| <sup>8</sup> C{ <sup>1</sup> H} NMR of Compound <b>5</b>       | S37 |
| <sup>9</sup> C HMBC NMR of Compound <b>5</b>                   | S38 |
| <sup>10</sup> C HMQC NMR of Compound <b>5</b>                  | S39 |
| <sup>11</sup> H NMR of Compound <b>6</b>                       | S40 |
| <sup>12</sup> C{ <sup>1</sup> H} NMR of Compound <b>6</b>      | S41 |

|                                                                                                    |     |
|----------------------------------------------------------------------------------------------------|-----|
| <sup>1</sup> H COSY NMR of Compound <b>3</b>                                                       | S19 |
| <sup>1</sup> H NOESY NMR of Compound <b>3</b>                                                      | S20 |
| <sup>13</sup> C { <sup>1</sup> H} NMR of Compound <b>3</b>                                         | S21 |
| <sup>13</sup> C JMOD NMR of Compound <b>3</b>                                                      | S22 |
| <sup>13</sup> C HMQC NMR of Compound <b>3</b>                                                      | S23 |
| <sup>1</sup> H NMR of Compound <b>3a</b>                                                           | S24 |
| <sup>13</sup> C{ <sup>1</sup> H} NMR of Compound <b>3a</b>                                         | S25 |
| <sup>1</sup> H NMR of Compound <b>3-Pd</b>                                                         | S26 |
| <sup>13</sup> C{ <sup>1</sup> H} NMR of Compound <b>3-Pd</b>                                       | S27 |
| <sup>1</sup> H NMR of Compound <b>3a-Pd</b>                                                        |     |
| <b>S28</b> <sup>13</sup> C HMQC of Compound <b>6</b>                                               |     |
| <b>S42</b>                                                                                         |     |
| <sup>31</sup> P { <sup>1</sup> H} NMR during the course of the synthesis of <b>1-G<sub>0</sub></b> | S43 |
| <sup>31</sup> P { <sup>1</sup> H} NMR of <b>1-G<sub>0</sub></b>                                    | S44 |
| <sup>31</sup> P { <sup>1</sup> H} NMR of dendrimer <b>1-G<sub>1</sub></b>                          | S45 |
| <sup>1</sup> H NMR of dendrimer <b>1-G<sub>1</sub></b>                                             | S46 |
| <sup>13</sup> C { <sup>1</sup> H} NMR of dendrimer <b>1-G<sub>1</sub></b>                          | S47 |
| <sup>31</sup> P { <sup>1</sup> H} NMR of dendrimer <b>3-G<sub>1</sub>-Pd<sub>12</sub></b>          |     |
| <b>S48</b>                                                                                         |     |
| <sup>1</sup> H NMR of dendrimer <b>3-G<sub>1</sub>-Pd<sub>12</sub></b>                             | S49 |
| <sup>13</sup> C { <sup>1</sup> H} NMR of dendrimer <b>3-G<sub>1</sub>-Pd<sub>12</sub></b>          |     |
| <b>S50</b>                                                                                         |     |
| <sup>13</sup> C JMOD NMR of dendrimer <b>3-G<sub>1</sub>-Pd<sub>12</sub></b>                       | S51 |
| <sup>13</sup> C HMQC NMR of dendrimer <b>3-G<sub>1</sub>-Pd<sub>12</sub></b>                       | S52 |
| <sup>31</sup> P { <sup>1</sup> H} NMR of dendrimer <b>3-G<sub>2</sub>-Pd<sub>24</sub></b>          |     |
| <b>S53</b>                                                                                         |     |
| <sup>1</sup> H NMR of dendrimer <b>3-G<sub>2</sub>-Pd<sub>24</sub></b>                             | S54 |
| <sup>13</sup> C { <sup>1</sup> H} NMR of dendrimer <b>3-G<sub>2</sub>-Pd<sub>24</sub></b>          |     |
| <b>S55</b>                                                                                         |     |
| <sup>13</sup> C JMOD NMR of dendrimer <b>3-G<sub>2</sub>-Pd<sub>24</sub></b>                       | S56 |
| <sup>31</sup> P { <sup>1</sup> H} NMR of dendrimer <b>3-G<sub>3</sub>-Pd<sub>48</sub></b>          |     |
| <b>S57</b>                                                                                         |     |
| <sup>1</sup> H NMR of dendrimer <b>3-G<sub>3</sub>-Pd<sub>48</sub></b>                             | S58 |
| <sup>13</sup> C { <sup>1</sup> H} NMR of dendrimer <b>3-G<sub>3</sub>-Pd<sub>48</sub></b>          |     |
| <b>S59</b>                                                                                         |     |



<sup>1</sup>  
**H NMR of Compound 2**

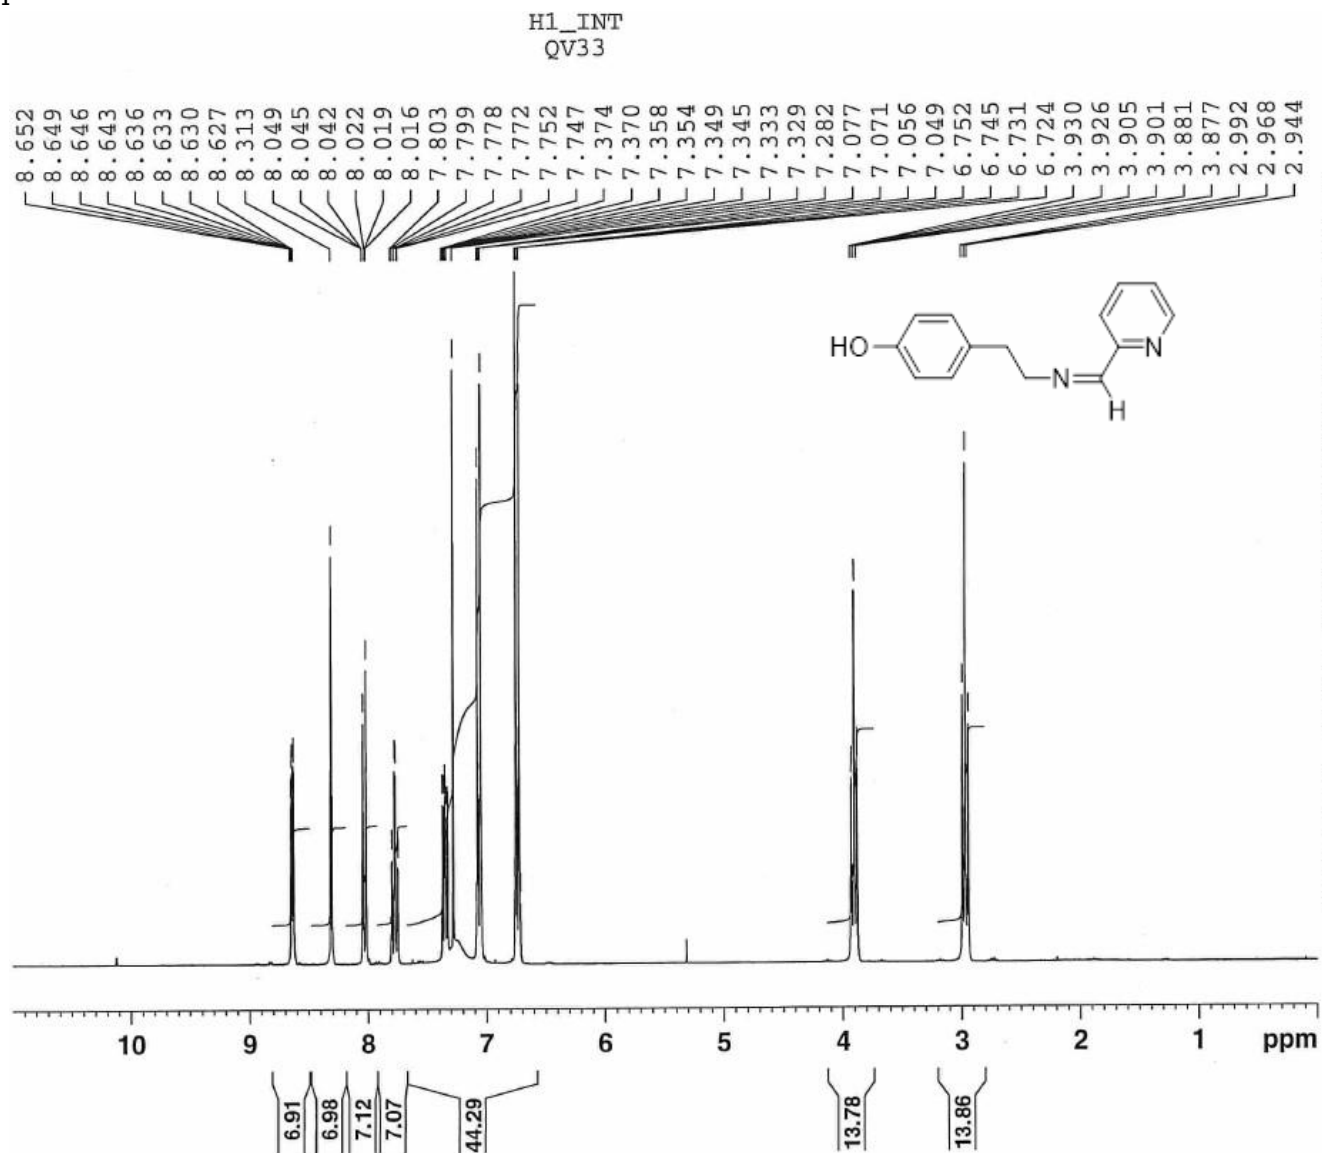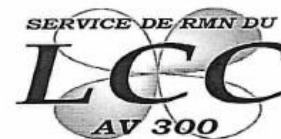

Current Data Parameters  
NAME hmfC0291  
EXPNO 1  
PROCNO 1  
USER majoral

F2 - Acquisition Parameters  
Date\_ 20110608  
Time 11.09  
INSTRUM spect  
PROBHD 5 mm TXO 31P/1  
PULPROG ls\_zg60  
TD 32768  
SOLVENT CDCl3  
NS 8  
DS 2  
SWH 5411.255 Hz  
FIDRES 0.165138 Hz  
AQ 3.0278132 sec  
RG 256  
DW 92.400 usec  
DE 10.00 usec  
TE 298.0 K  
D1 10.00000000 sec  
MCREST 0.00000000 sec  
MCWRK 0.01500000 sec

===== CHANNEL f1 =====  
NUC1 1H  
P1 10.60 usec  
PL1 -2.00 dB  
SFO1 300.1318008 MHz

F2 - Processing parameters  
SI 32768  
SF 300.1300000 MHz  
WDW EM  
SSB 0  
LB 0.10 Hz  
GB 0  
PC 1.40

<sup>1</sup>  
**H COSY NMR of Compound 2**

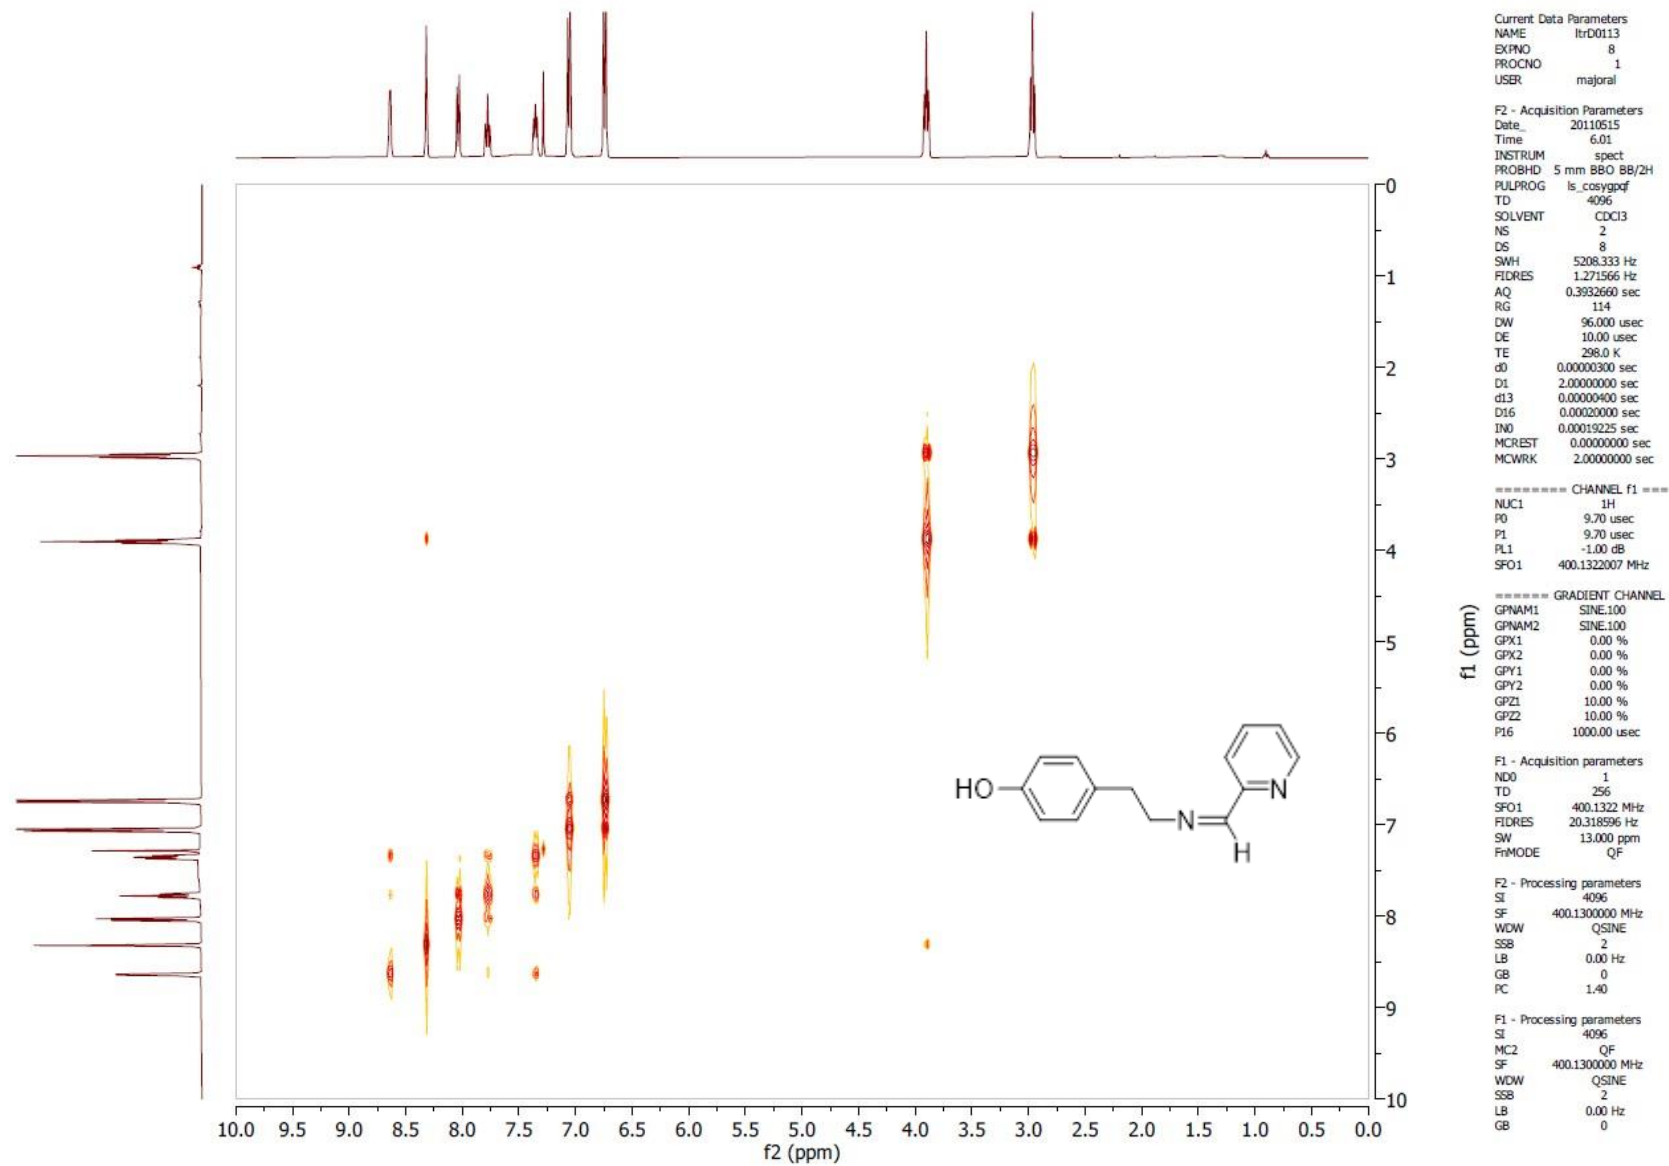

<sup>1</sup>  
**H TOCSY NMR of Compound 2**



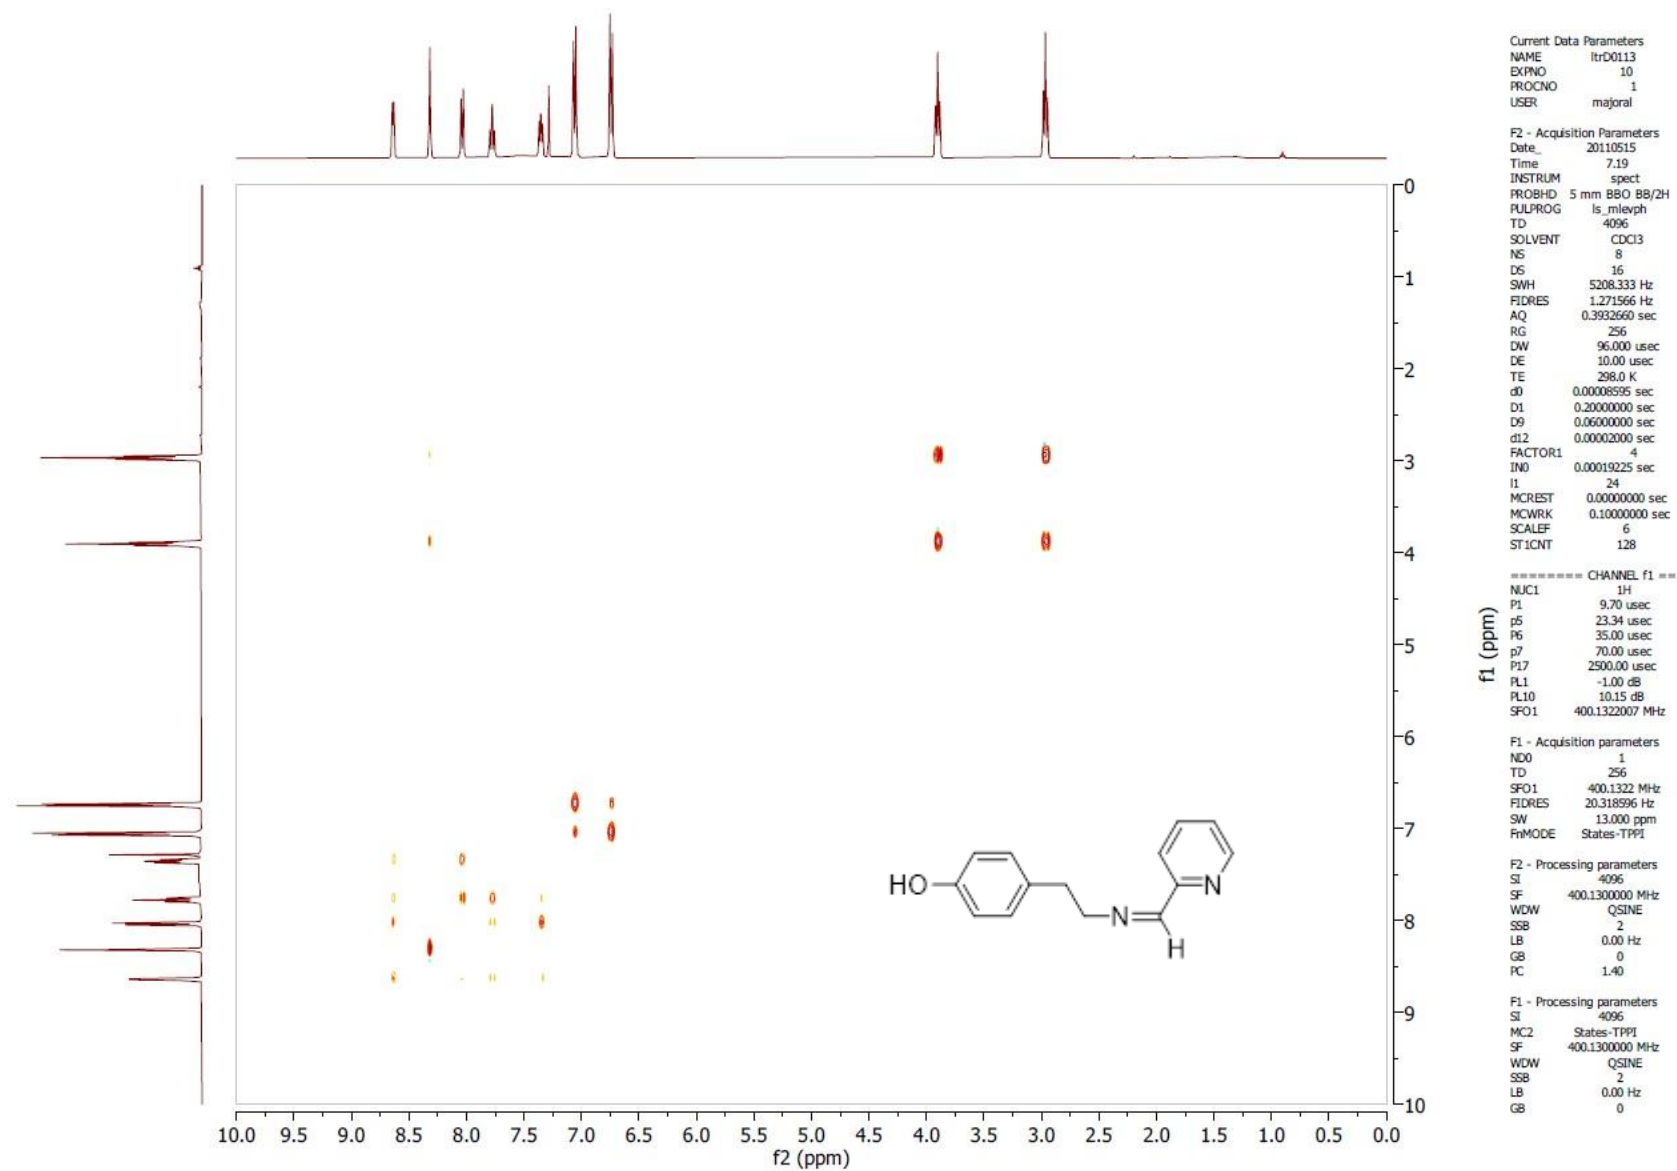

<sup>13</sup>C

{<sup>1</sup>H} NMR of Compound 2

<sup>13</sup>C

C13\_DECOUPLE\_H1  
QV14 tyramine + pir-2-carboxaldehyde

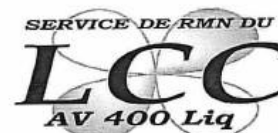

Current Data Parameters  
NAME ltrD0113  
EXPNO 3  
PROCNO 1  
USER majoral

F2 - Acquisition Parameters  
Date\_ 20110515  
Time 2.24  
INSTRUM spect  
PROBHD 5 mm BBO BB/2H  
PULPROG ls\_zg60dc  
TD 32768  
SOLVENT CDCl3  
NS 26000  
DS 4  
SWH 25125.629 Hz  
FIDRES 0.766773 Hz  
AQ 0.6521332 sec  
RG 36780.8  
DW 19.900 usec  
DE 10.00 usec  
TE 298.0 K  
D1 1.00000000 sec  
d11 0.03000000 sec  
MCREST 0.00000000 sec  
MCWRK 0.01500000 sec

===== CHANNEL f1 =====  
NUC1 <sup>13</sup>C  
P1 7.30 usec  
PL1 0.00 dB  
SFO1 100.6233333 MHz

===== CHANNEL f2 =====  
CPDPRG2 waltz16  
NUC2 <sup>1</sup>H  
PCPD2 92.00 usec  
PL2 -1.00 dB  
PL12 17.94 dB  
SFO2 400.1318006 MHz

F2 - Processing parameters  
SI 65536  
SF 100.6127690 MHz  
WDW EM  
SSB 0  
LB 1.00 Hz  
GB 0  
PC 0.30

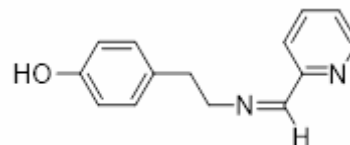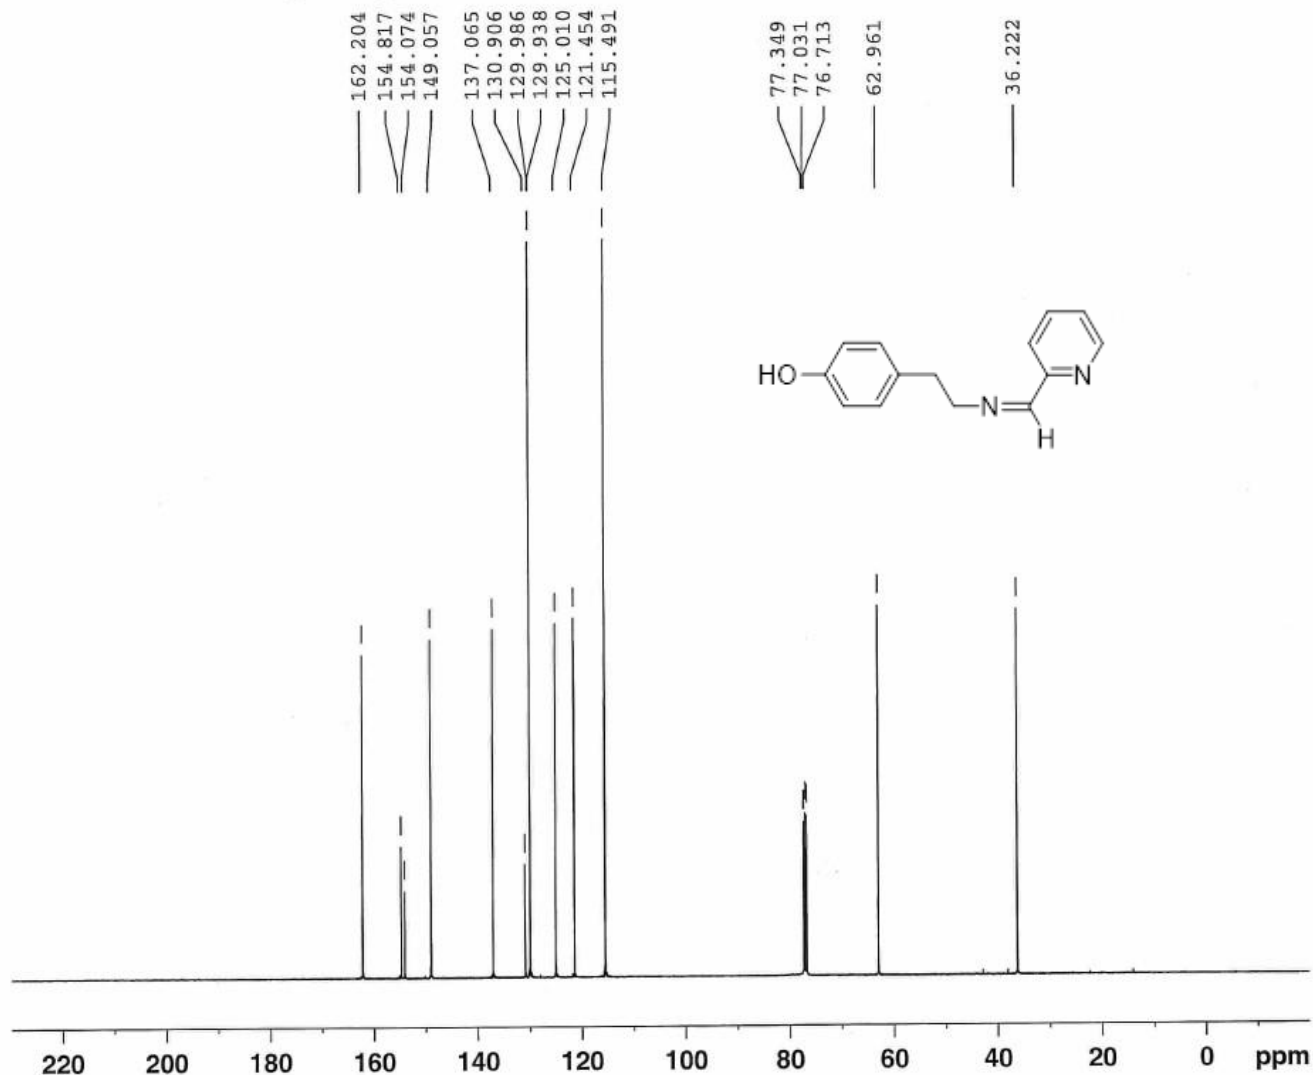

**<sup>13</sup>C**

**JMOD NMR of Compound 2**

<sup>13</sup>C

C13\_JMOD\_H1  
QV14 tyramine + pir-2-carboxaldehyde

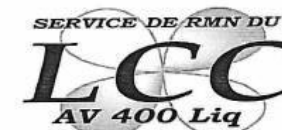

Current Data Parameters  
NAME ltrD0113  
EXPNO 5  
PROCNO 1  
USER majoral

F2 - Acquisition Parameters  
Date\_ 20110515  
Time 4.14  
INSTRUM spect  
PROBHD 5 mm BBO BB/2H  
PULPROG ls\_jmod  
TD 32768  
SOLVENT CDCl3  
NS 1200  
DS 4  
SWH 25125.629 Hz  
FIDRES 0.766773 Hz  
AQ 0.6521332 sec  
RG 26008  
DW 19.900 usec  
DE 10.00 usec  
TE 298.0 K  
CNST2 145.0000000  
CNST11 1.0000000  
d1 2.00000000 sec  
d20 0.00689655 sec  
DELTA 0.00000929 sec  
MCREST 0.00000000 sec  
MCWRK 0.01500000 sec

===== CHANNEL f1 =====  
NUC1 13C  
P1 7.30 usec  
p2 14.60 usec  
PL1 0.00 dB  
SFO1 100.6233333 MHz

===== CHANNEL f2 =====  
CPDPRG2 waltz16  
NUC2 1H  
PCPD2 92.00 usec  
PL2 -1.00 dB  
PL12 17.94 dB  
SFO2 400.1318006 MHz

F2 - Processing parameters  
SI 65536  
SF 100.6127690 MHz  
WDW EM  
SSB 0  
LB 1.00 Hz  
GB 0  
PC 1.40

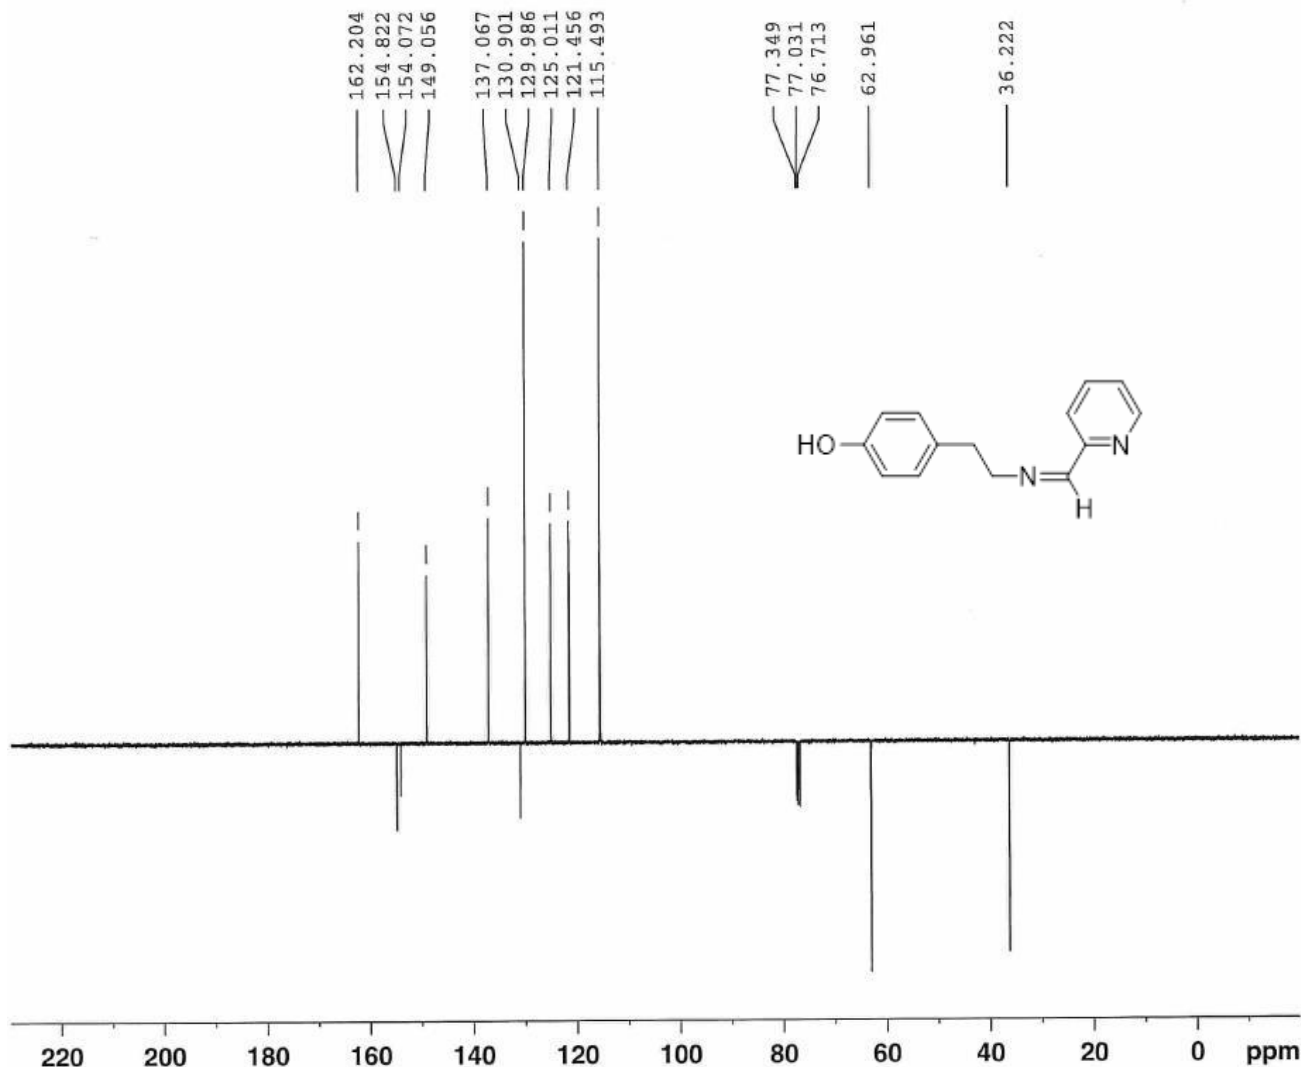

<sup>13</sup>C

DEPT NMR of Compound 2

<sup>13</sup>C

C13\_DEPT135\_H1  
QV14 tyramine + pir-2-carboxaldehyde

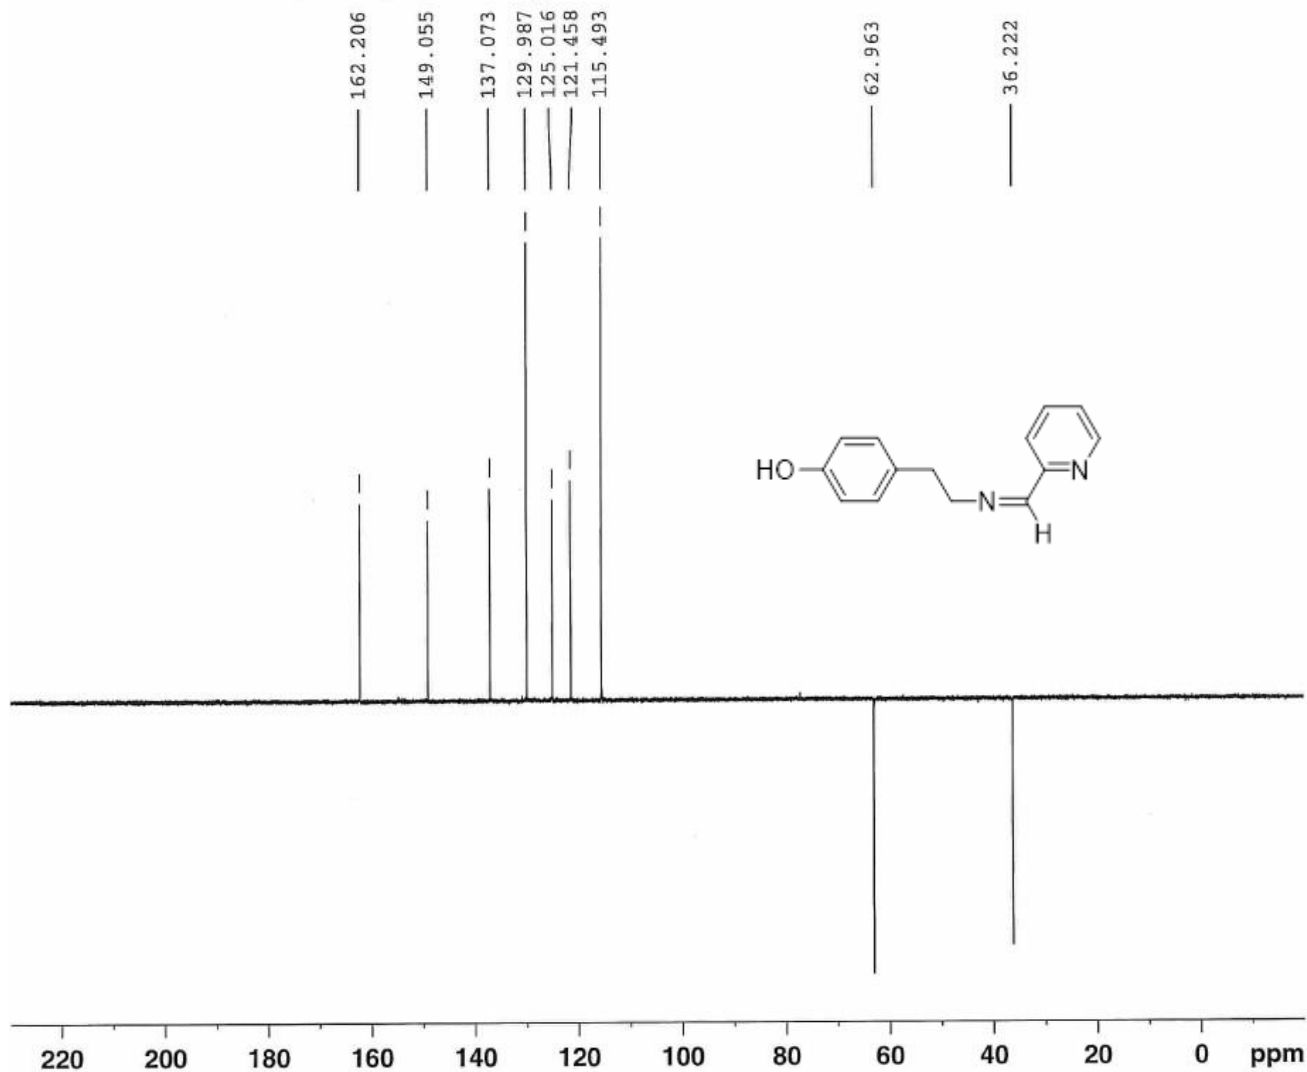

SERVICE DE RMN DU  
**LCC**  
AV 400 Liq

Current Data Parameters  
NAME ltrD0113  
EXPNO 4  
PROCNO 1  
USER majoral

F2 - Acquisition Parameters  
Date\_ 20110515  
Time 3.19  
INSTRUM spect  
PROBHD 5 mm BBO BB/2H  
PULPROG ls\_dept135  
TD 32768  
SOLVENT CDC13  
NS 1200  
DS 4  
SWH 25125.629 Hz  
FIDRES 0.766773 Hz  
AQ 0.6521332 sec  
RG 29193  
DW 19.900 usec  
DE 10.00 usec  
TE 298.0 K  
CNST2 145.0000000  
d1 2.00000000 sec  
d2 0.00344828 sec  
d12 0.00002000 sec  
DELTA 0.00000929 sec  
MCREST 0.00000000 sec  
MCWRK 0.01500000 sec

===== CHANNEL f1 =====  
NUC1 13C  
P1 7.30 usec  
p2 14.60 usec  
PL1 0.00 dB  
SFO1 100.6233333 MHz

===== CHANNEL f2 =====  
CPDPRG2 waltz16  
NUC2 1H  
P3 10.40 usec  
p4 20.80 usec  
PCPD2 92.00 usec  
PL2 -1.00 dB  
PL12 17.94 dB  
SFO2 400.1318006 MHz

F2 - Processing parameters  
SI 65536  
SF 100.6127690 MHz  
WDW EM  
SSB 0  
LB 1.00 Hz  
GB 0  
PC 1.40

# <sup>13</sup>C HMBC NMR of Compound 2

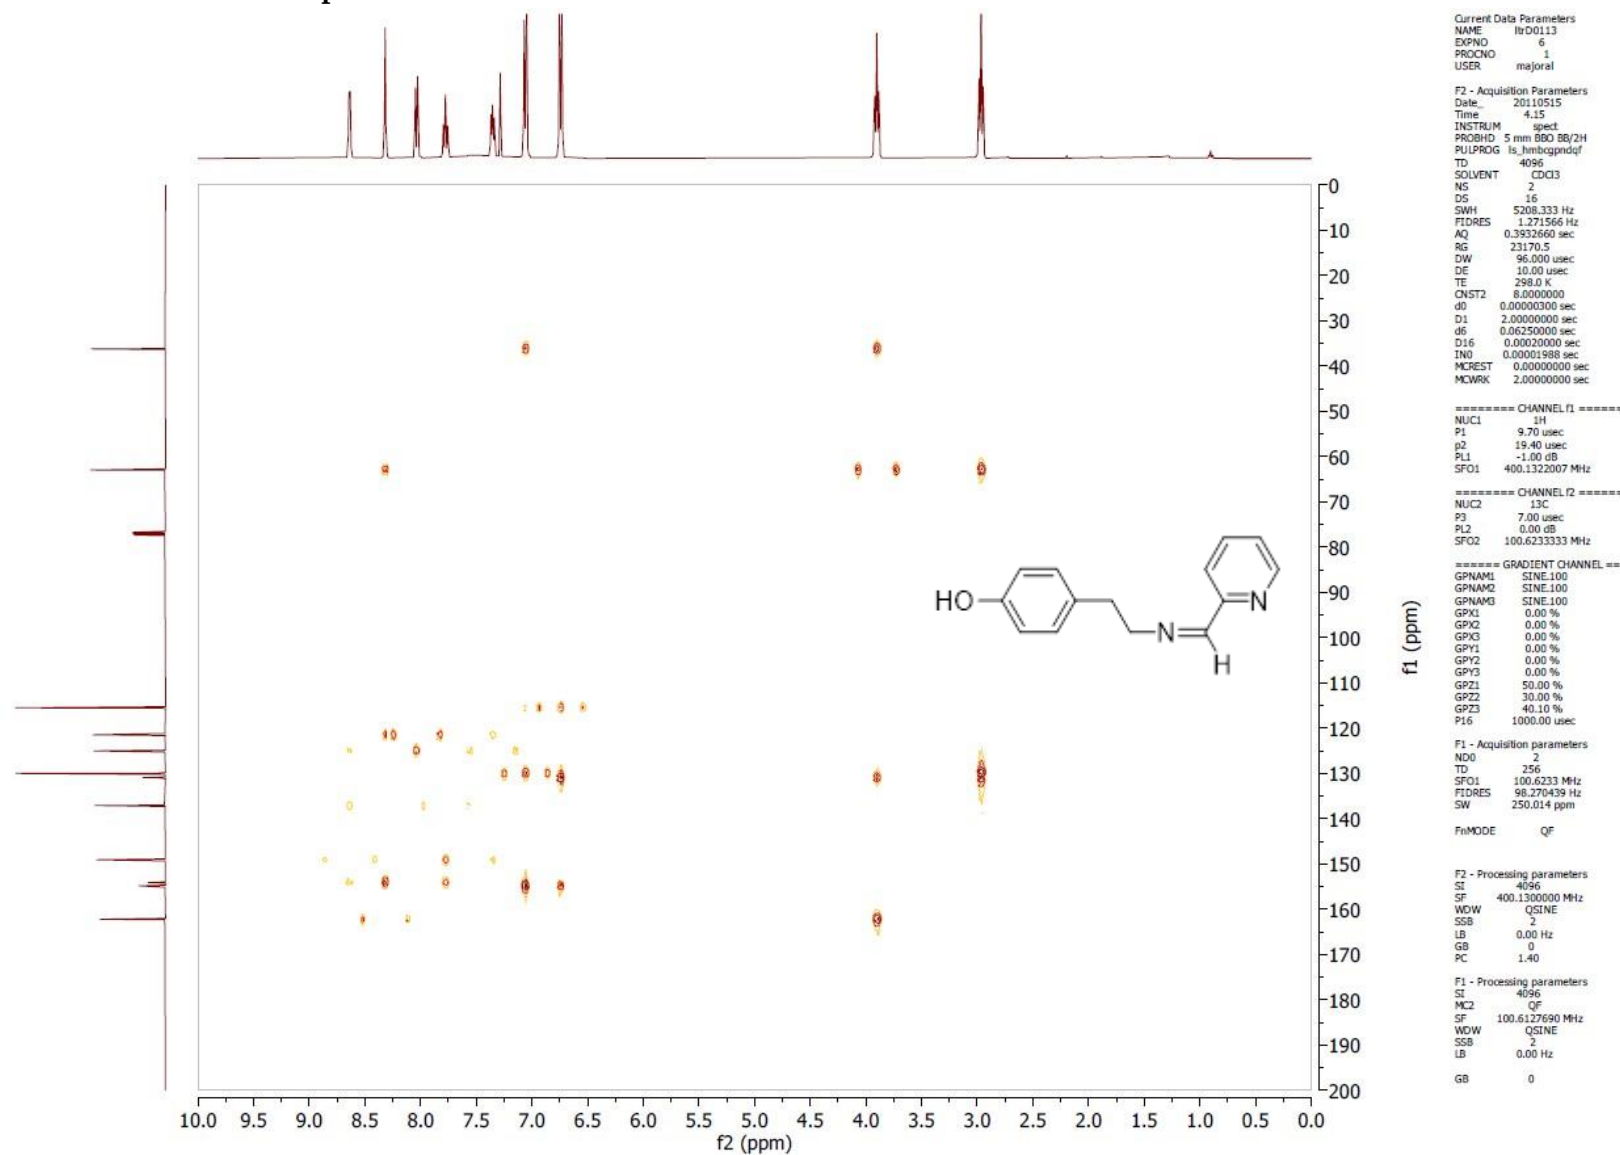



# C HMQC NMR of Compound 2

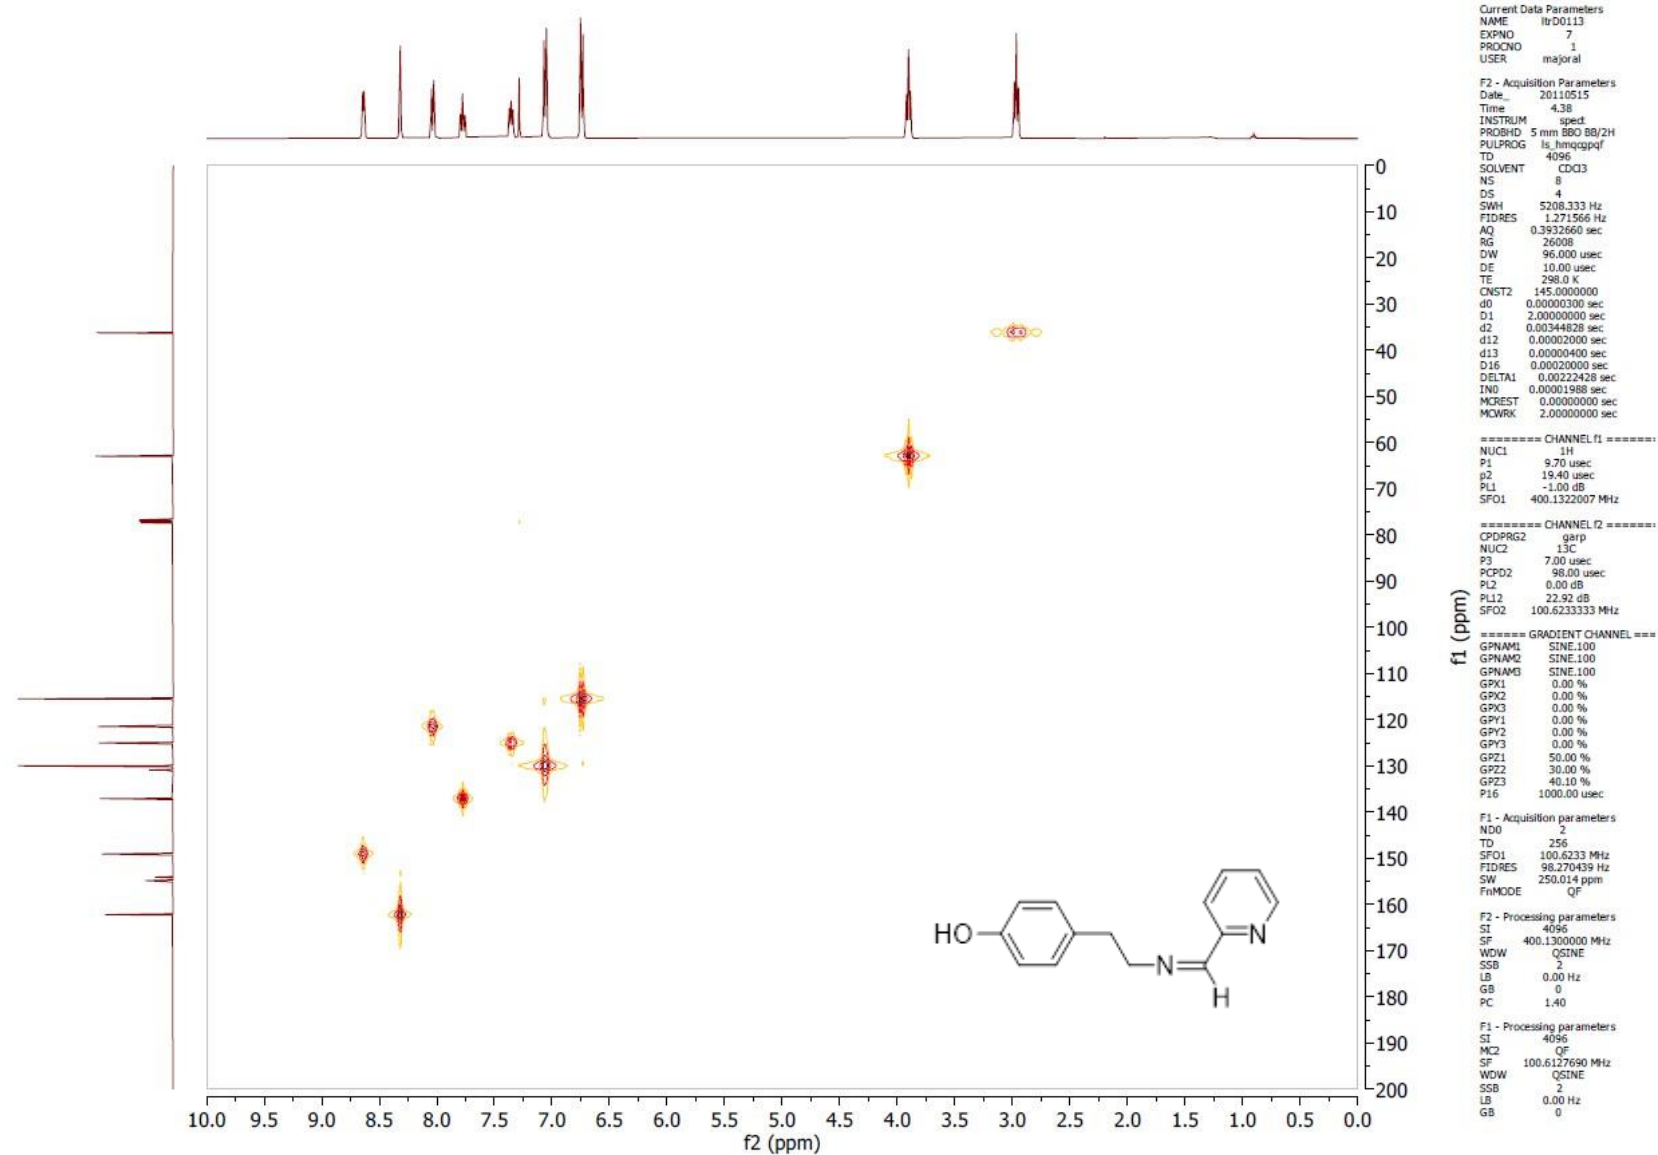

**$^1\text{H}$  NMR of Compound 2a**

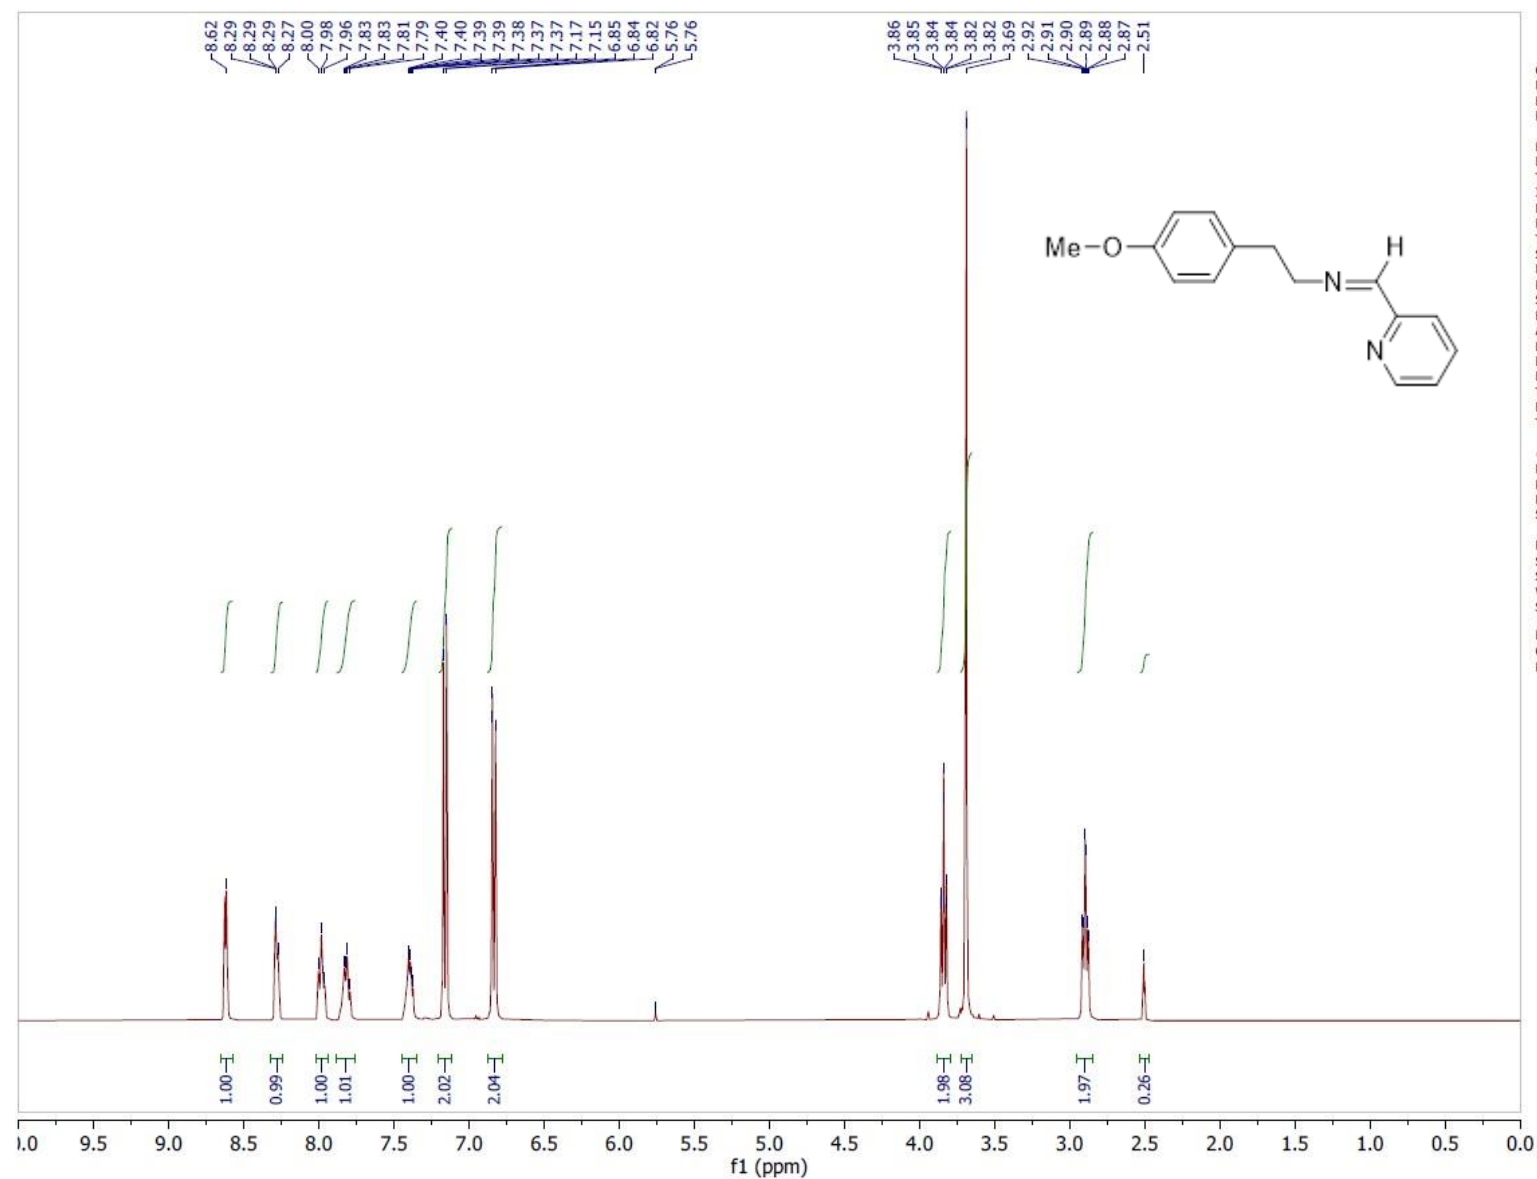

Current Data Parameters  
NAME hmfG0252  
EXPNO 1  
PROCNO 1

F2 - Acquisition Parameters  
Date\_ 20200722  
Time 21.57  
INSTRUM spect  
PROBHD 5 mm PABBO BB  
PULPROG ls\_zg60  
TD 65536  
SOLVENT DMSO  
NS 16  
DS 2  
SWH 7211.539 Hz  
FIDRES 0.110039 Hz  
AQ 4.5438795 sec  
RG 10  
DW 69.333 usec  
DE 6.50 usec  
TE 298.0 K  
D1 20.00000000 sec  
TD0 1

===== CHANNEL f1 =====  
NUC1 <sup>1</sup>H  
P1 14.00 usec  
PLW1 17.00000000 W  
SFO1 400.1628011 MHz

F2 - Processing parameters  
SI 131072  
SF 400.1600000 MHz  
WDW EM  
SSB 0  
LB 0.10 Hz  
GB 0  
PC 1.50

C {<sup>1</sup>H} NMR of Compound 2a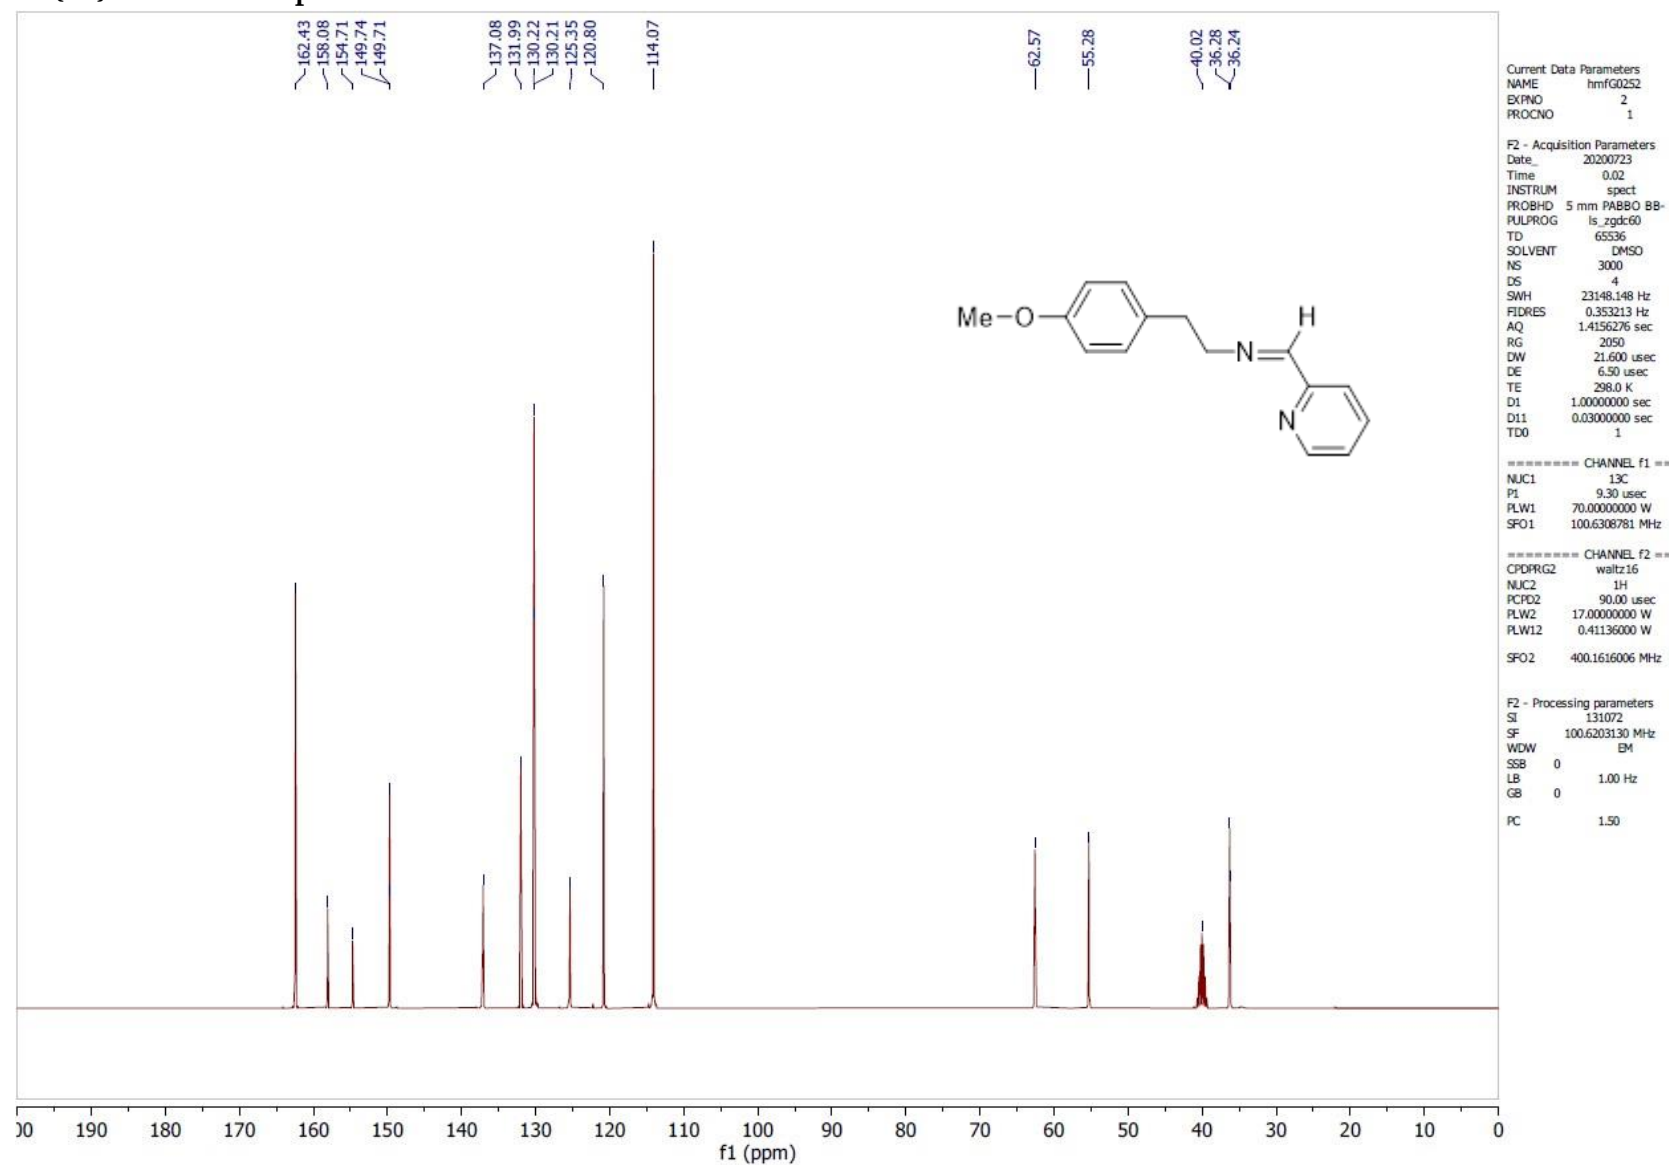

**C JMOD NMR of Compound 2a**

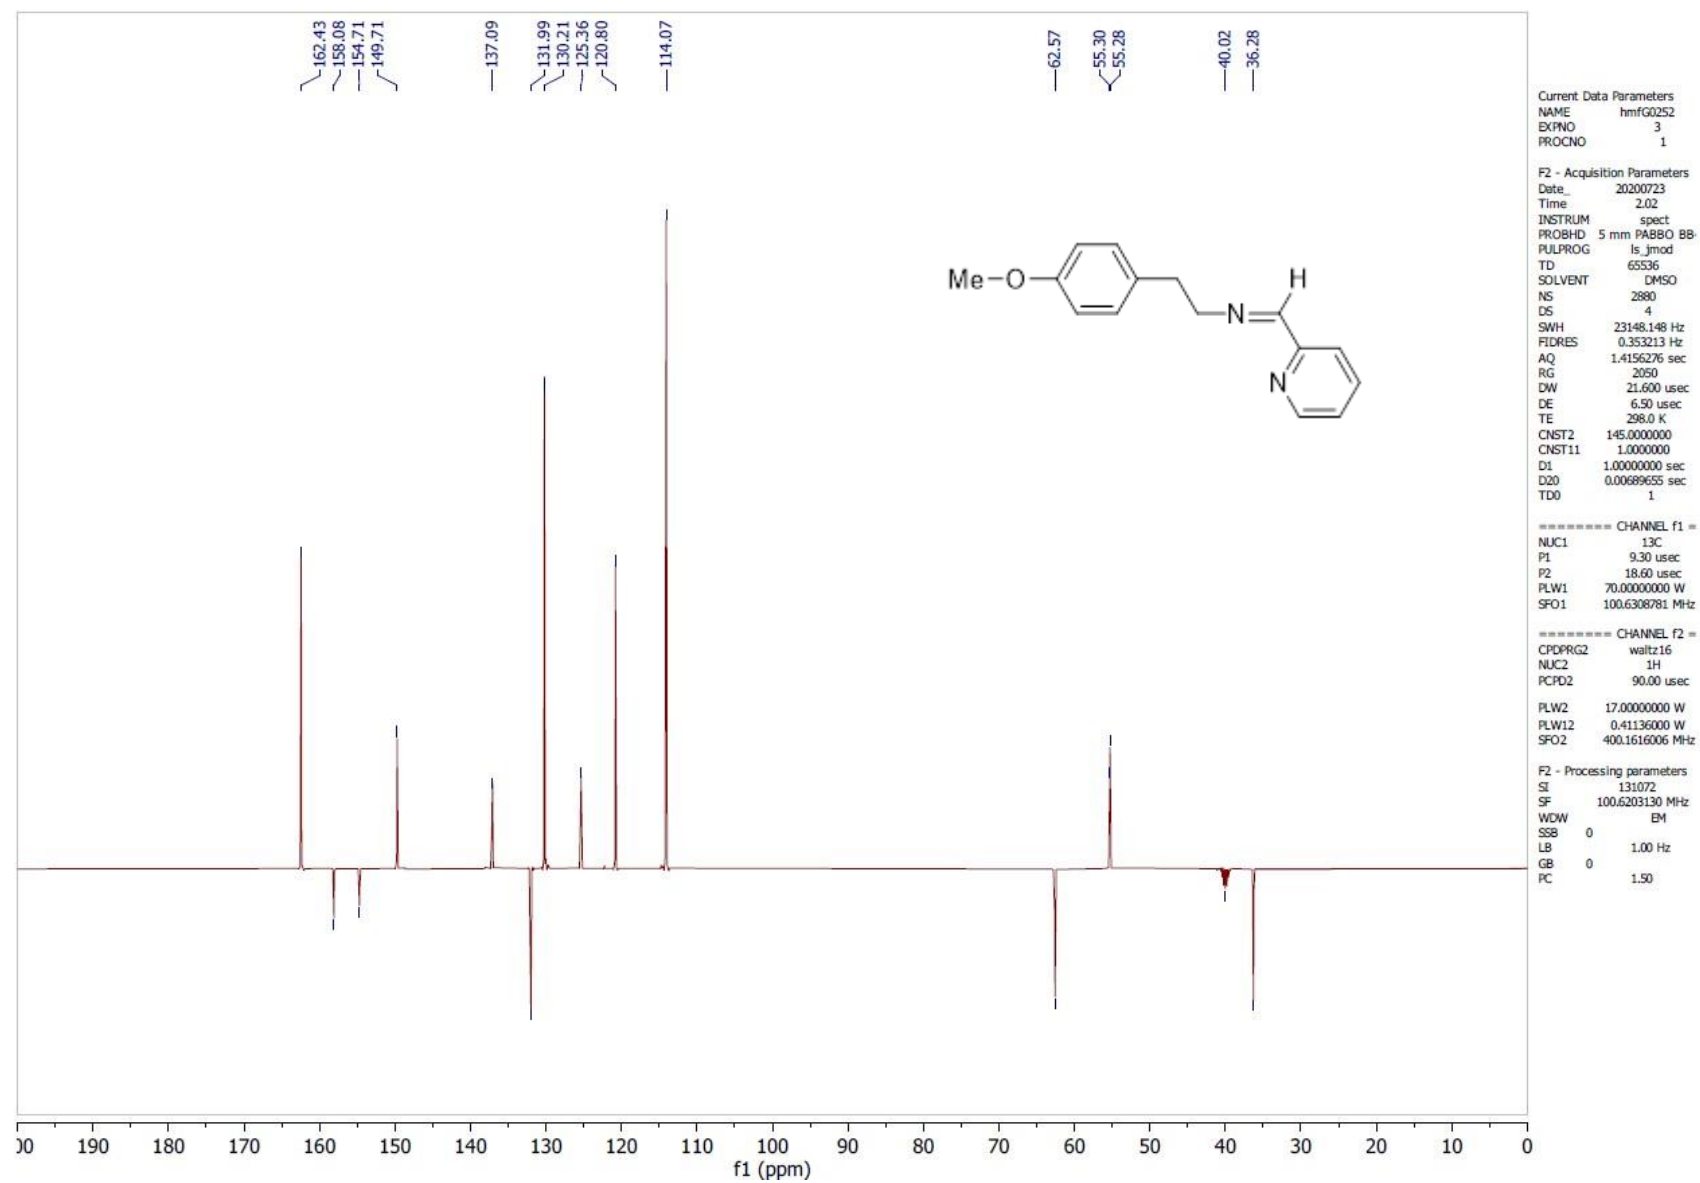

# C HMQC NMR of Compound 2a

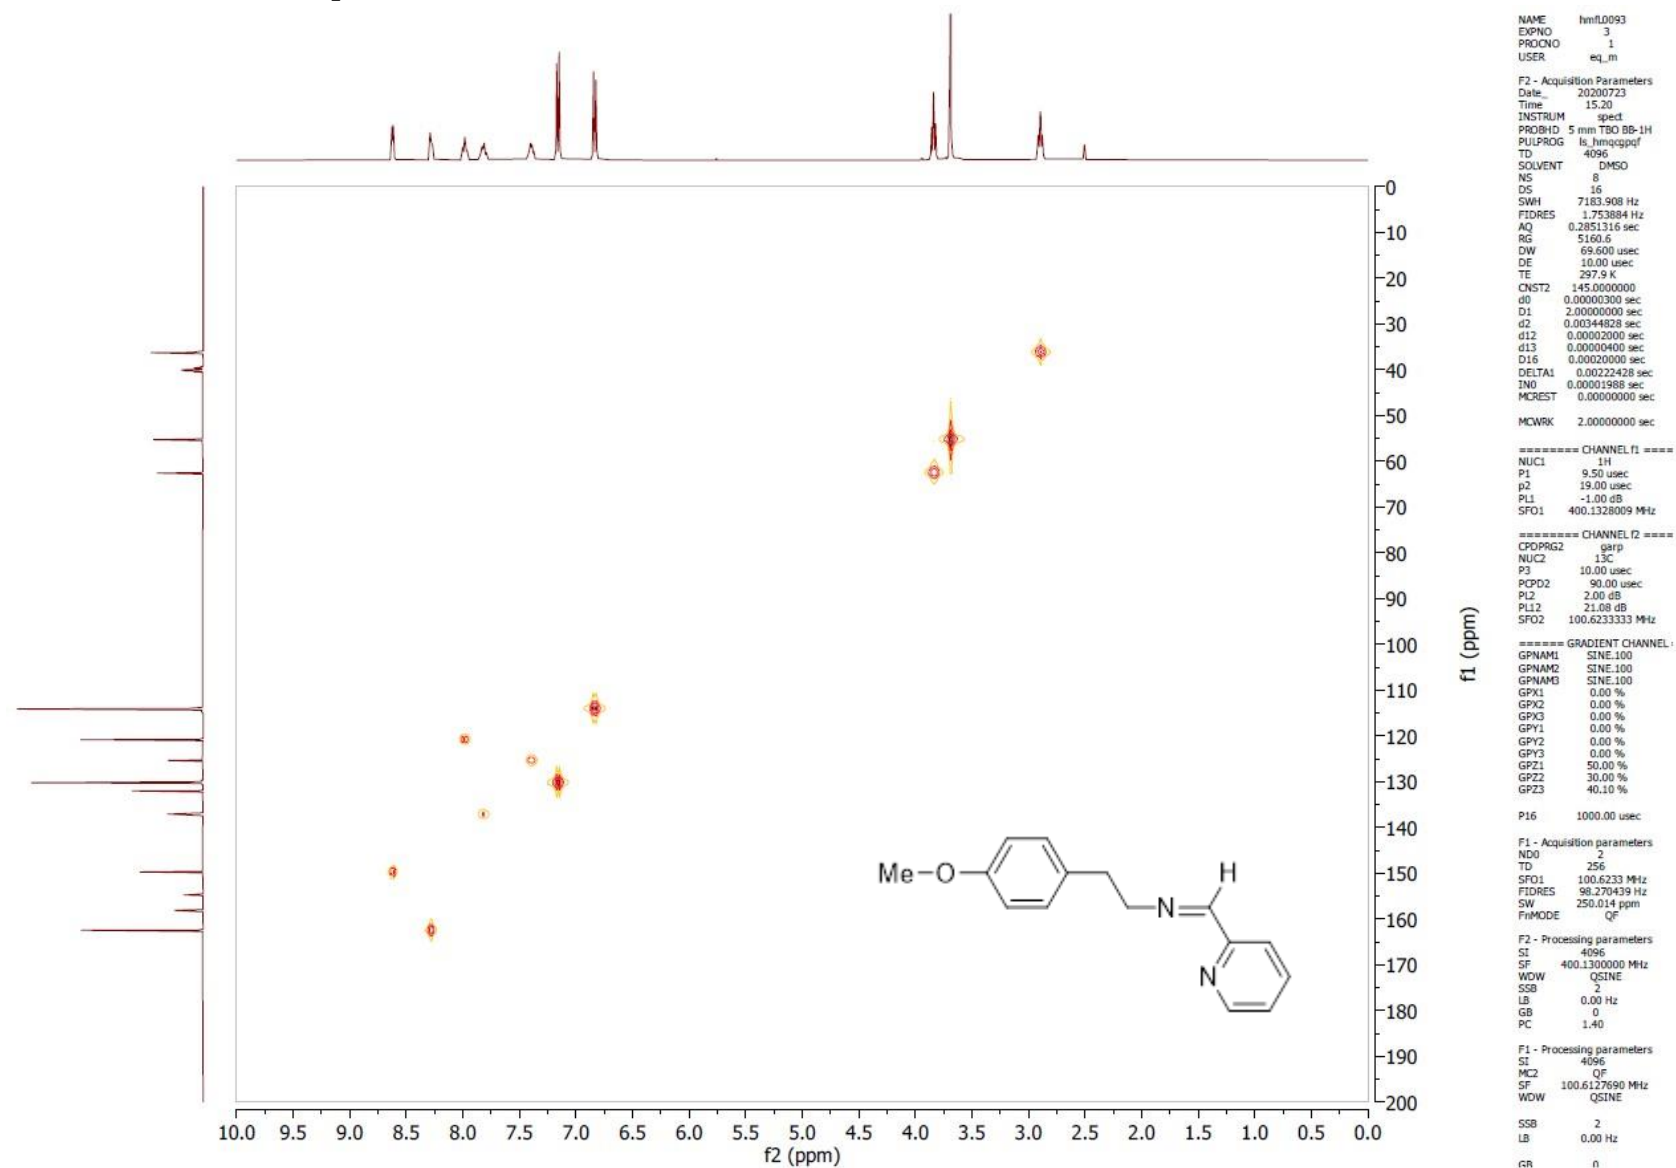

**<sup>1</sup>H NMR of Compound 2a-Pd**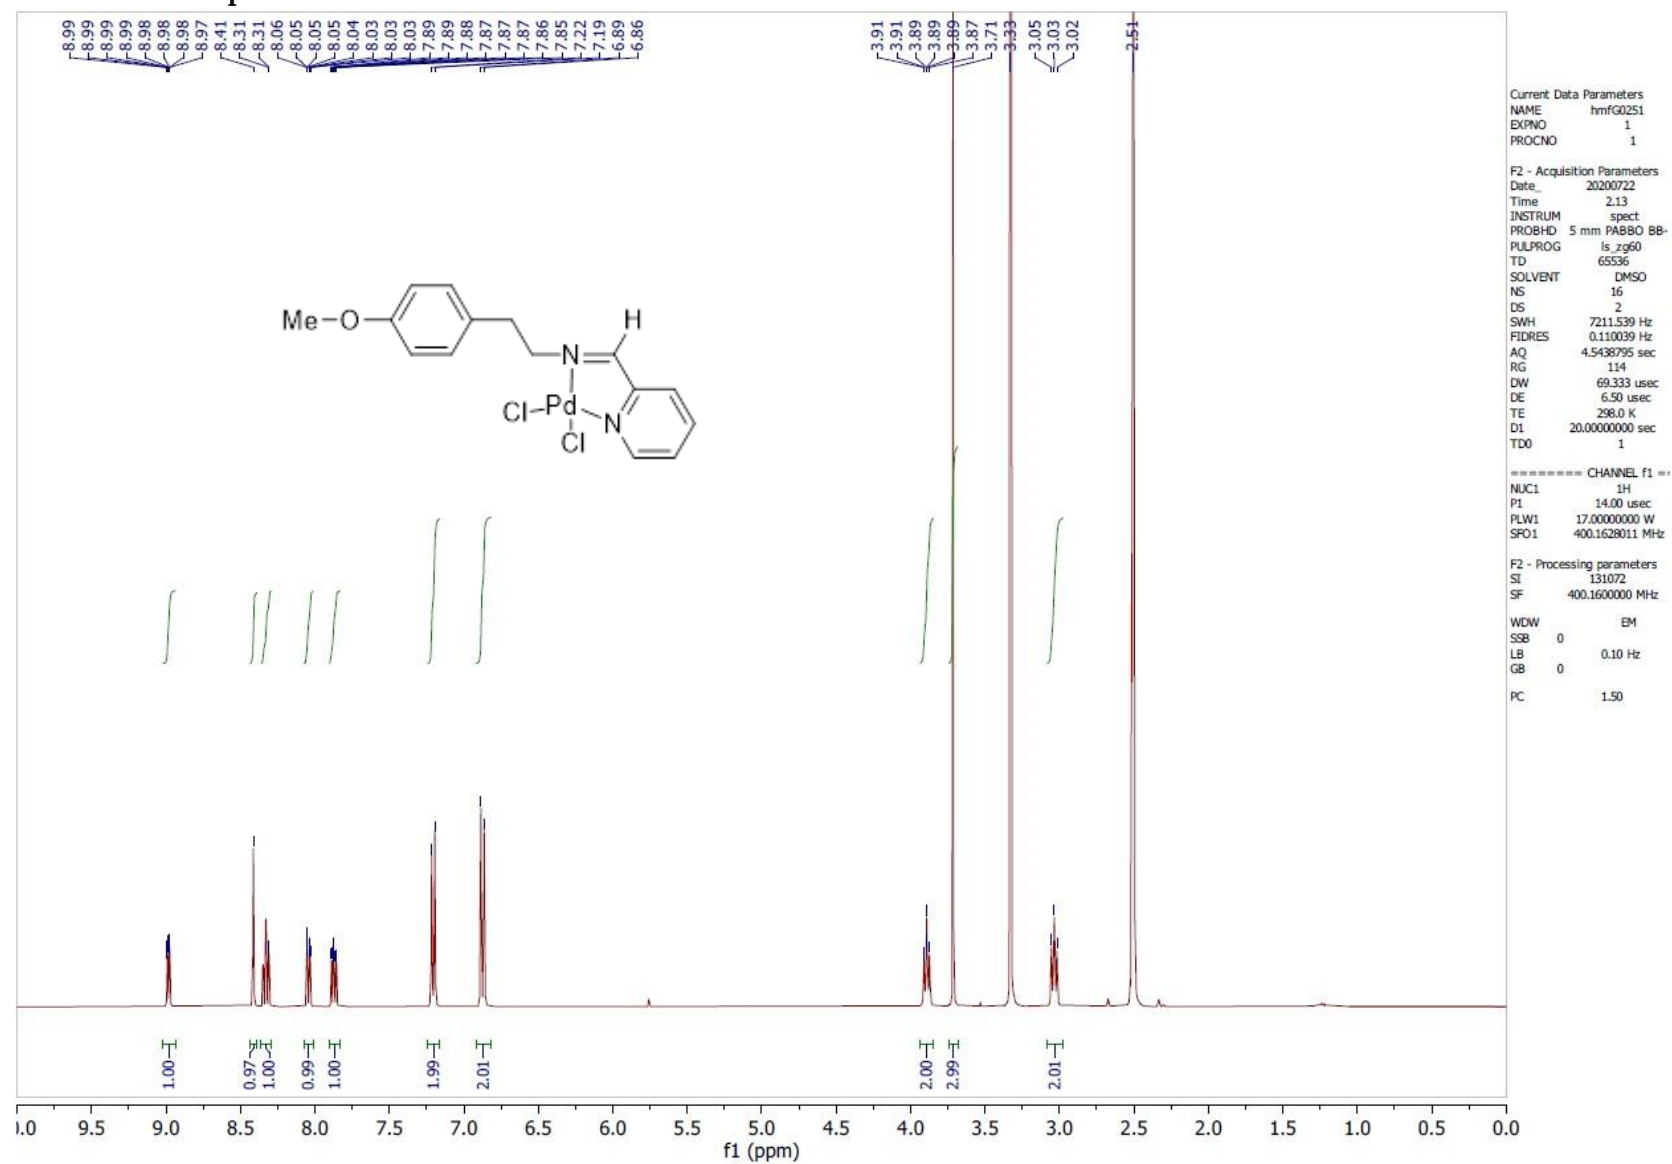



# <sup>13</sup>C {<sup>1</sup>H} NMR of Compound 2a-Pd

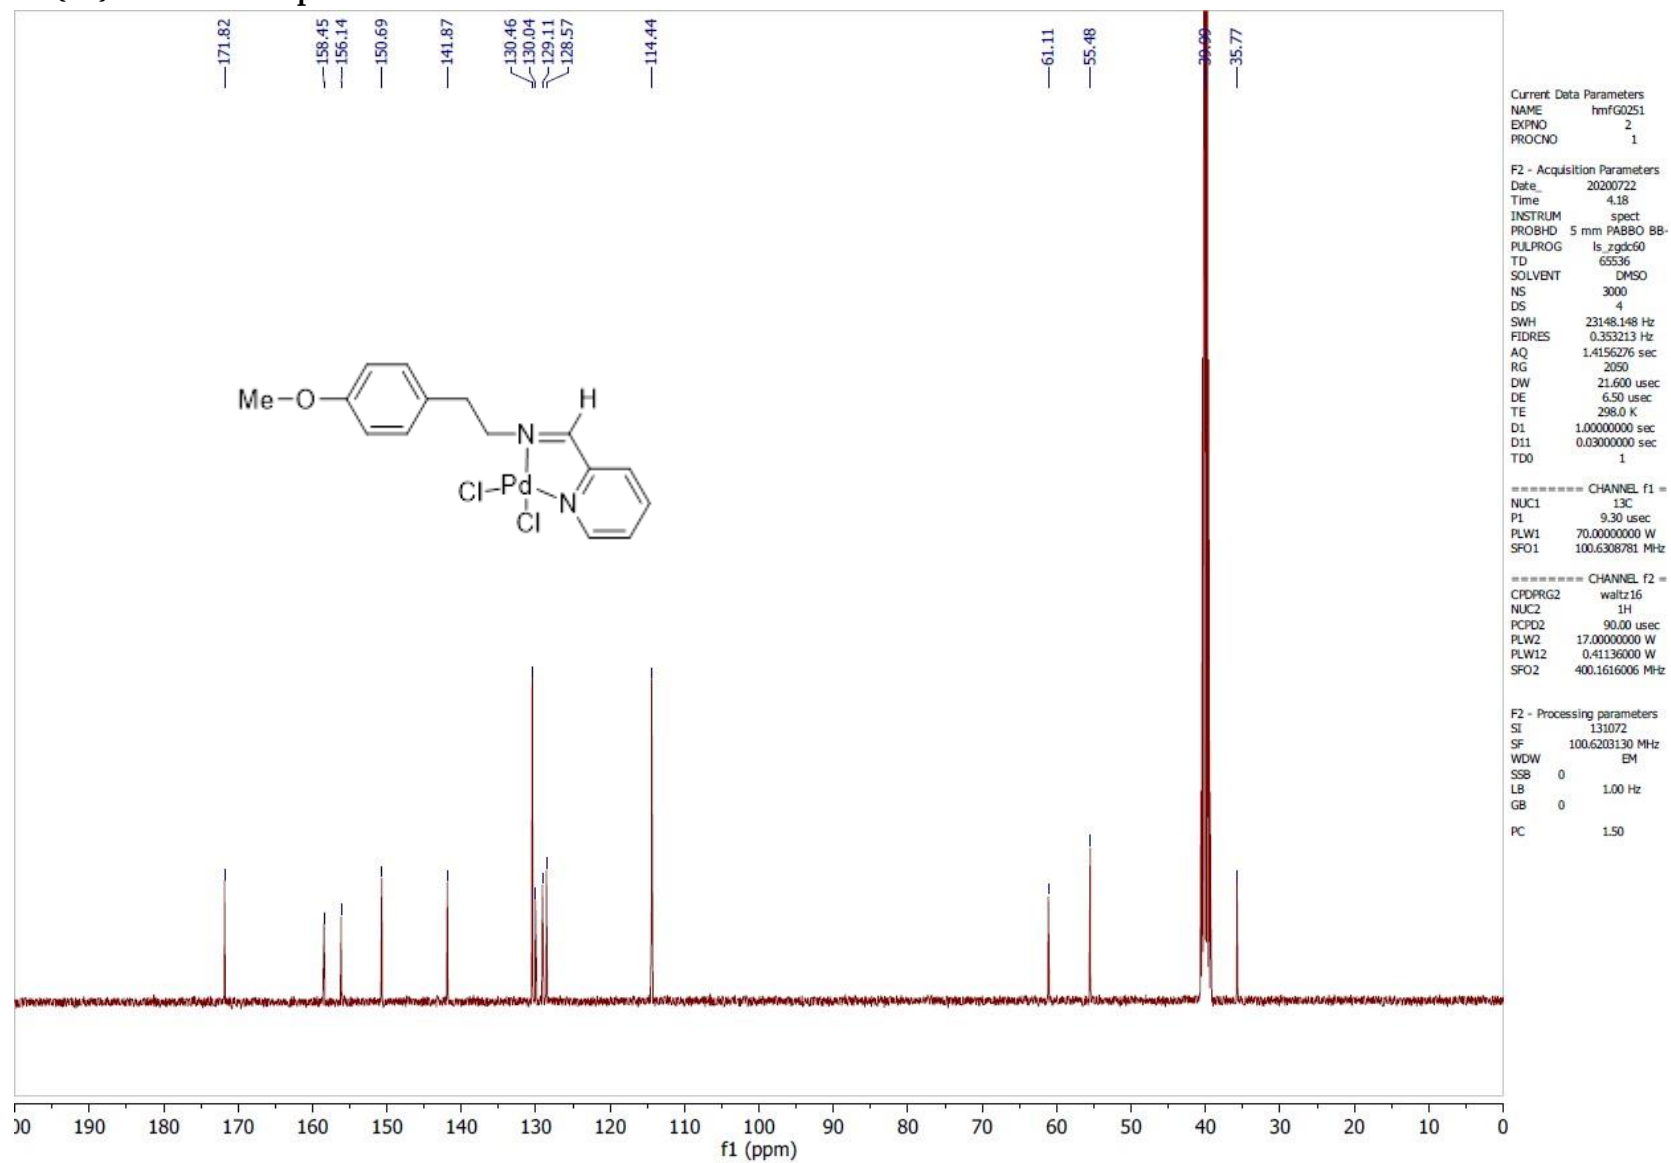

<sup>13</sup>C HMQC NMR of Compound 2a-Pd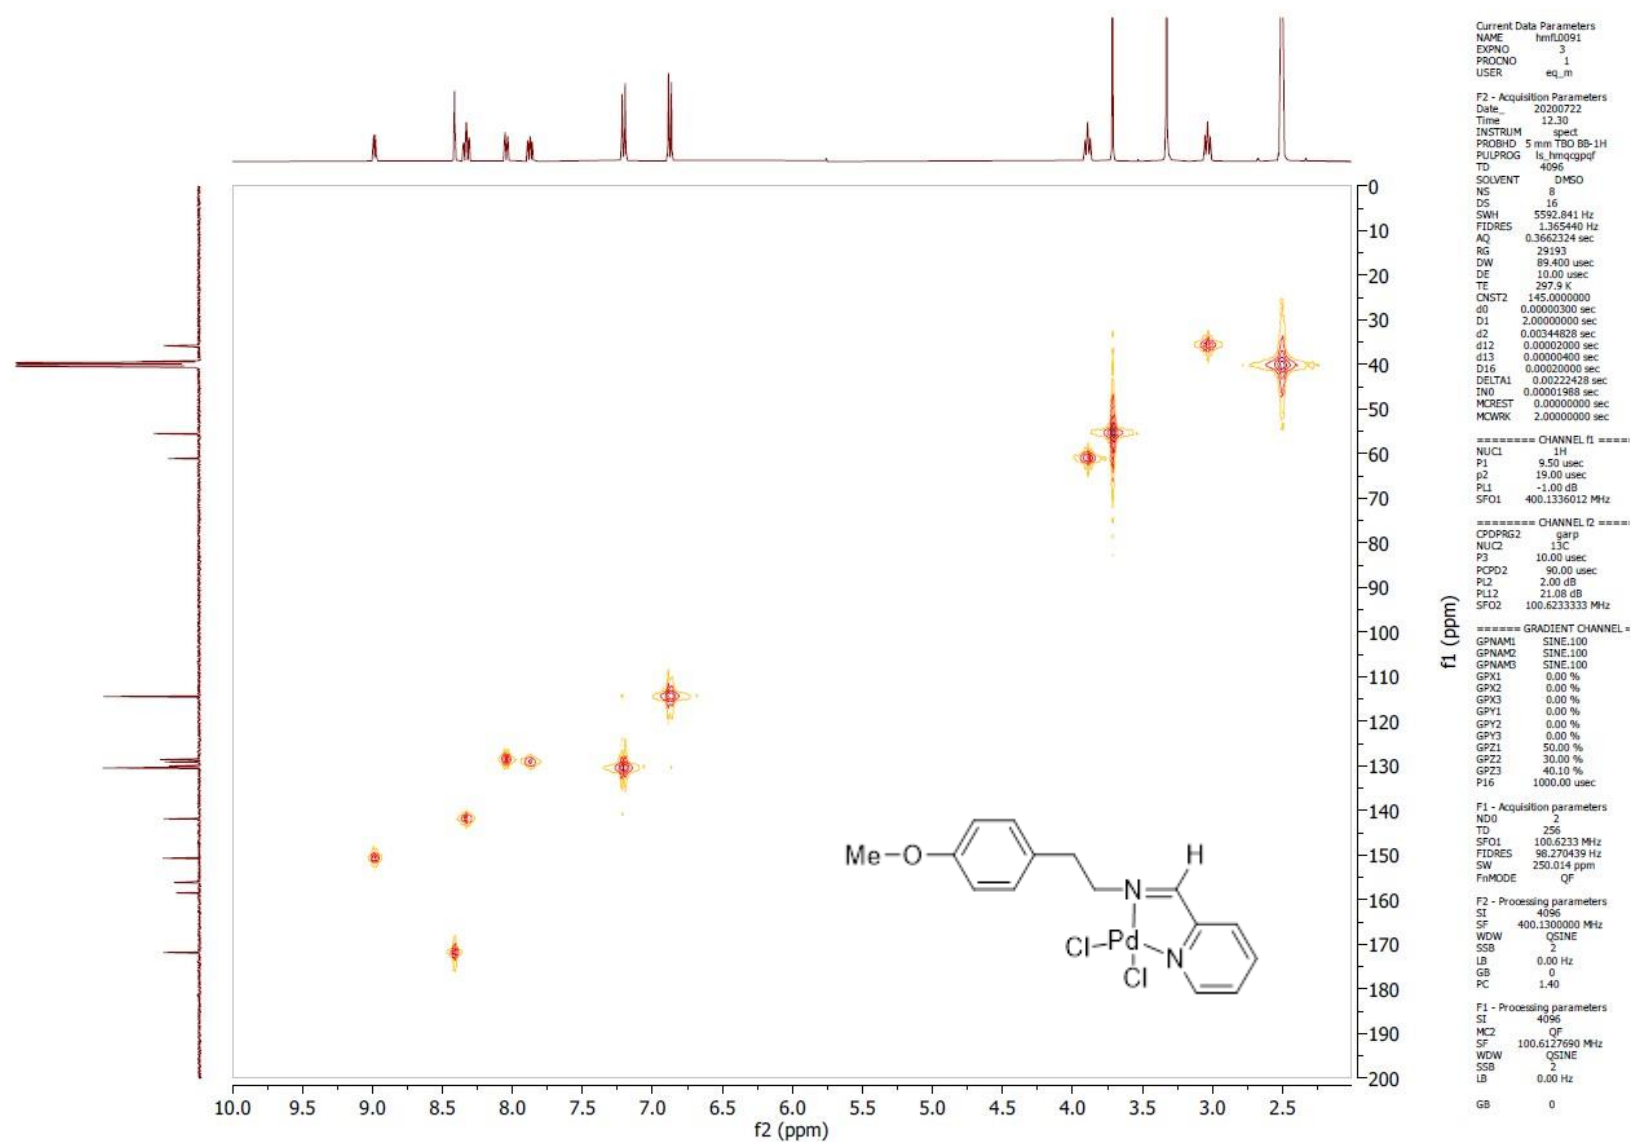

<sup>1</sup>  
**H NMR of Compound 3**

1

ser00022.1.fid — H1\_INT — C-124:2, CDCl3/THF

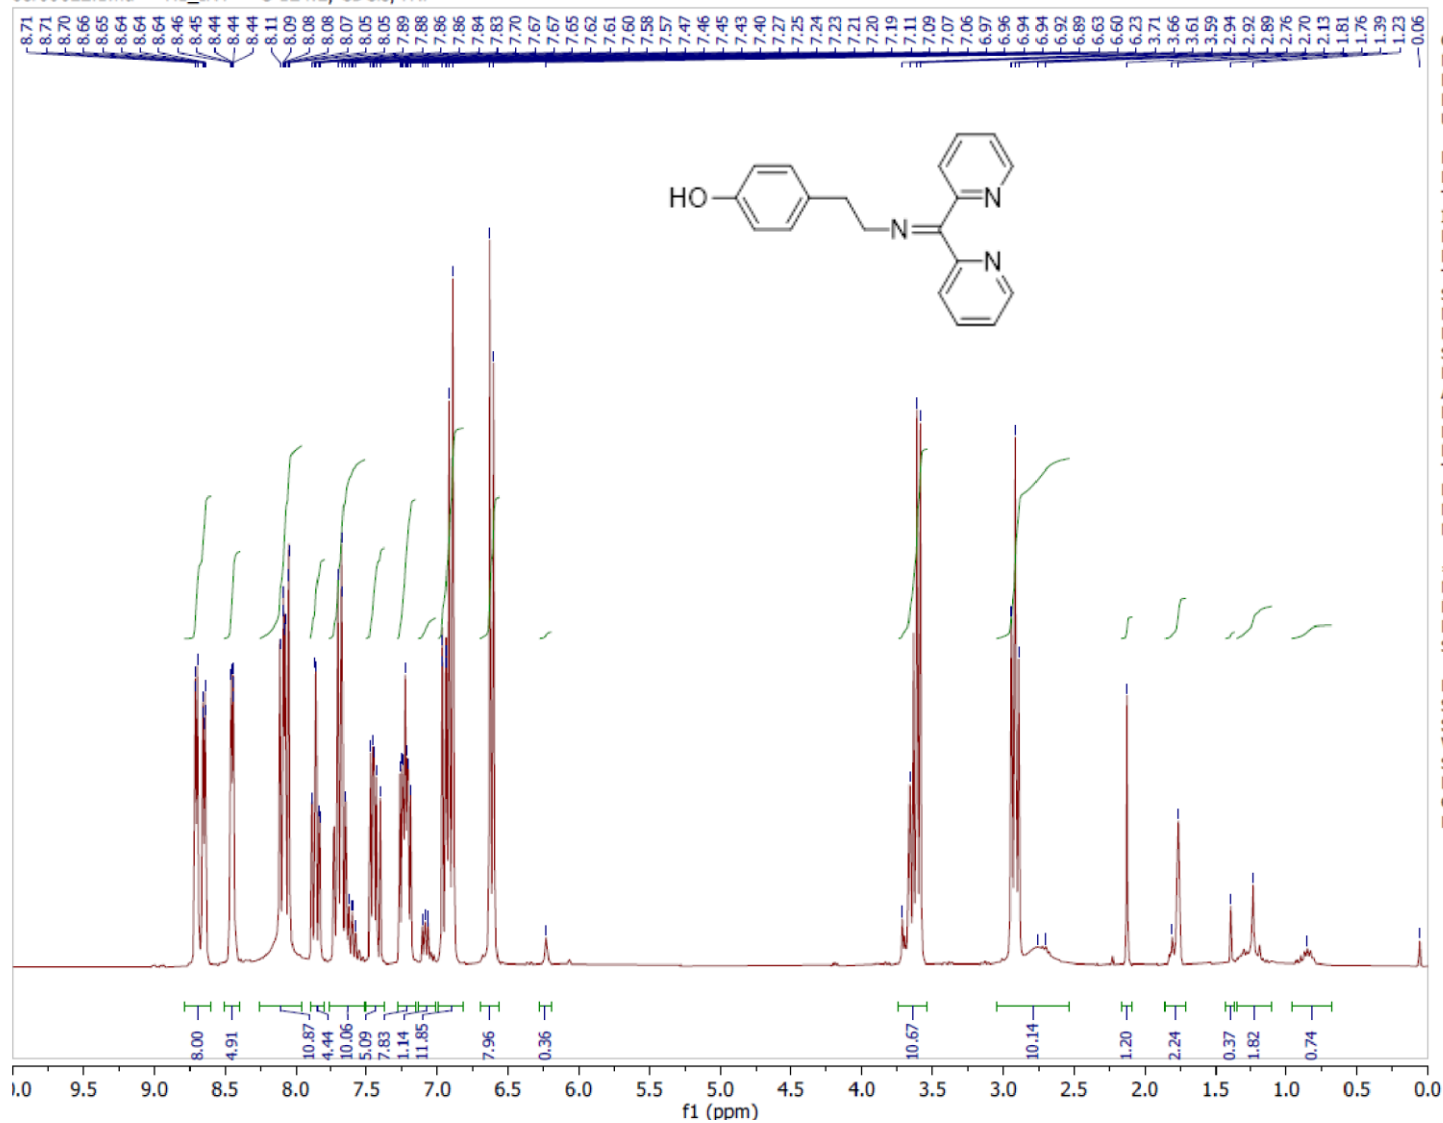

## Current Data Parameters

NAME ser00022  
EXPNO 1  
PROCNO 1  
USER majoral

## F2 - Acquisition Parameters

Date\_ 20061026  
Time 13.04  
INSTRUM spect  
PROBHD 5 mm TXO 31P/1  
PULPROG ls\_zg60  
TD 32768  
SOLVENT THF  
NS 8  
DS 0  
SWH 3591.954 Hz  
FIDRES 0.109618 Hz  
AQ 4.5613556 sec  
RG 114  
DW 139.200 usec  
DE 10.00 usec  
TE 298.0 K  
D1 10.00000000 sec  
MCREST 0.00000000 sec  
MCWRK 0.01500000 sec

## ===== CHANNEL f1 ==

NUC1 1H  
P1 6.10 usec  
PL1 -6.00 dB  
SFO1 300.1315007 MHz

## F2 - Processing parameters

SI 32768  
SF 300.1300000 MHz  
WDW EM  
SSB 0  
LB 0.10 Hz  
GB 0  
PC 1.40

<sup>1</sup>  
**H COSY NMR of Compound 3**

1

H1\_COSY\_GP\_QF  
C-124:2, CDCl<sub>3</sub>/THF

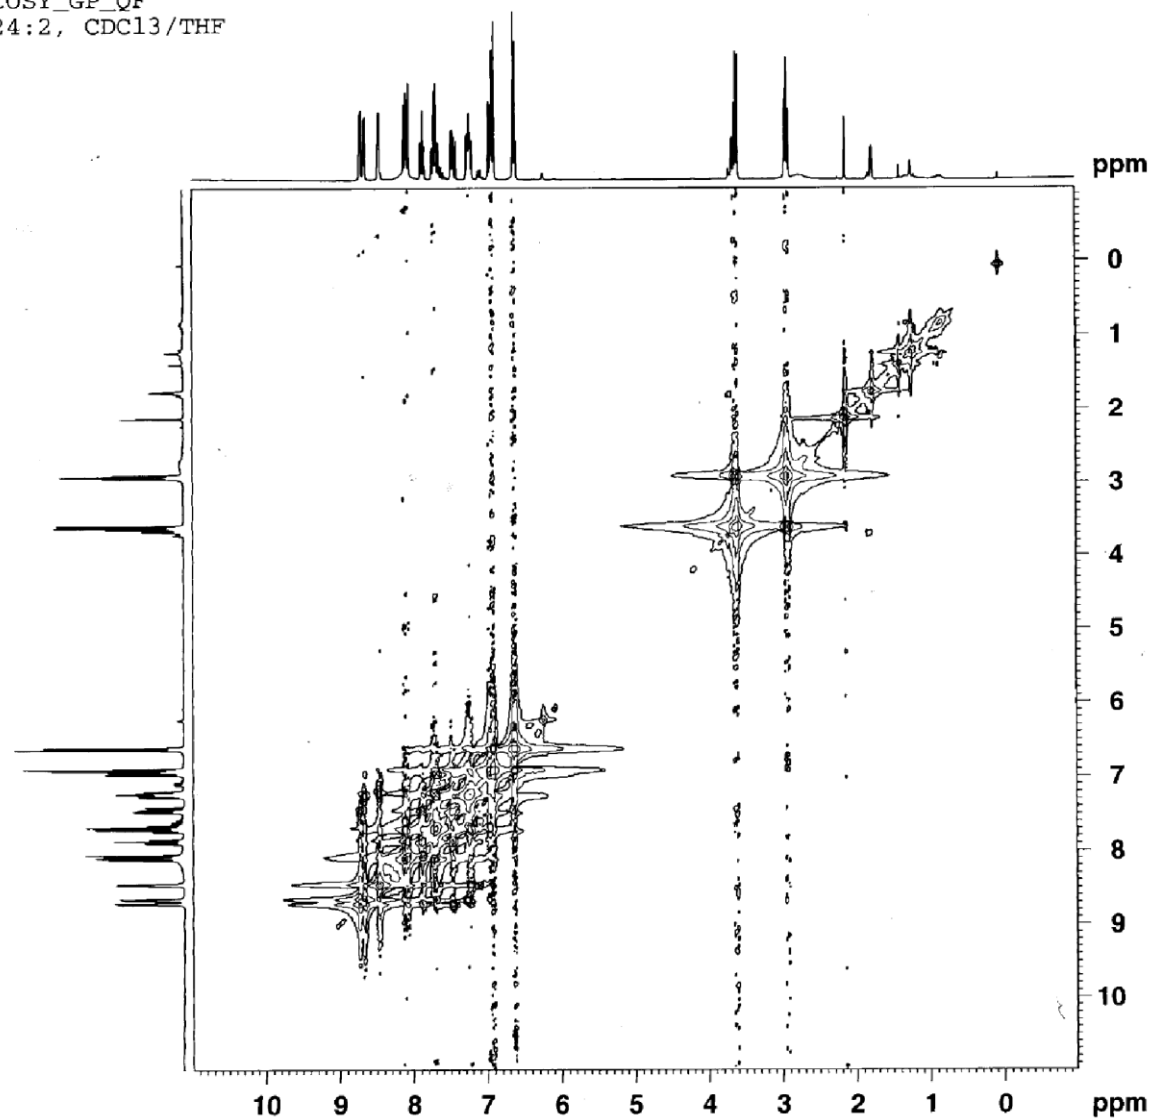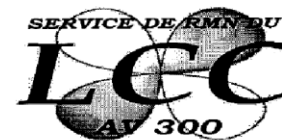

Current Data Parameters  
NAME ser00022  
EXNO 5  
PROCNO 1  
USER majoral

F2 - Acquisition Parameters  
Date 20061025  
Time 13.52  
INSTRUM spect  
PROBHD 5 mm TXO 31P/1  
PULPROG 1s\_cosygpqf  
TD 4096  
SOLVENT THF  
NS 2  
DS 0  
SWH 3591.954 Hz  
FIDRES 0.876942 Hz  
AQ 0.5702132 sec  
RG 128  
DW 139.200 usec  
DE 10.00 usec  
TE 298.0 K  
d0 0.00000300 sec  
d1 2.00000000 sec  
d13 0.00000400 sec  
d16 0.00020000 sec  
INO 0.00027840 sec  
MCREST 0.00000000 sec  
MCWRK 2.00000000 sec

===== CHANNEL f1 =====  
NUC1 1H  
P0 6.10 usec  
P1 6.10 usec  
PL1 -6.00 dB  
SFO1 300.1315007 MHz

===== GRADIENT CHANNEL =====  
GPNAM1 SINE.100  
GPNAM2 SINE.100  
GPX1 0.00 %  
GPX2 0.00 %  
GPY1 0.00 %  
GPY2 0.00 %  
GPZ1 10.00 %  
GPZ2 10.00 %  
P16 1000.00 usec

F1 - Acquisition parameters  
WDW 1  
TD 256  
SFO1 300.1315 MHz  
FIDRES 14.031071 Hz  
SW 11.966 ppm  
FAMODE QF

F2 - Processing parameters  
SI 4096  
SF 300.1300000 MHz  
WDW QSINE  
SSB 2  
LB 0.00 Hz  
GB 0  
PC 1.40

F1 - Processing parameters  
SI 4096  
MC2 QF  
SF 300.1300000 MHz  
WDW QSINE  
SSB 2  
LB 0.00 Hz  
GB 0

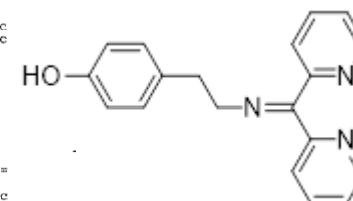

<sup>1</sup>  
**H NOESY NMR of Compound 3**

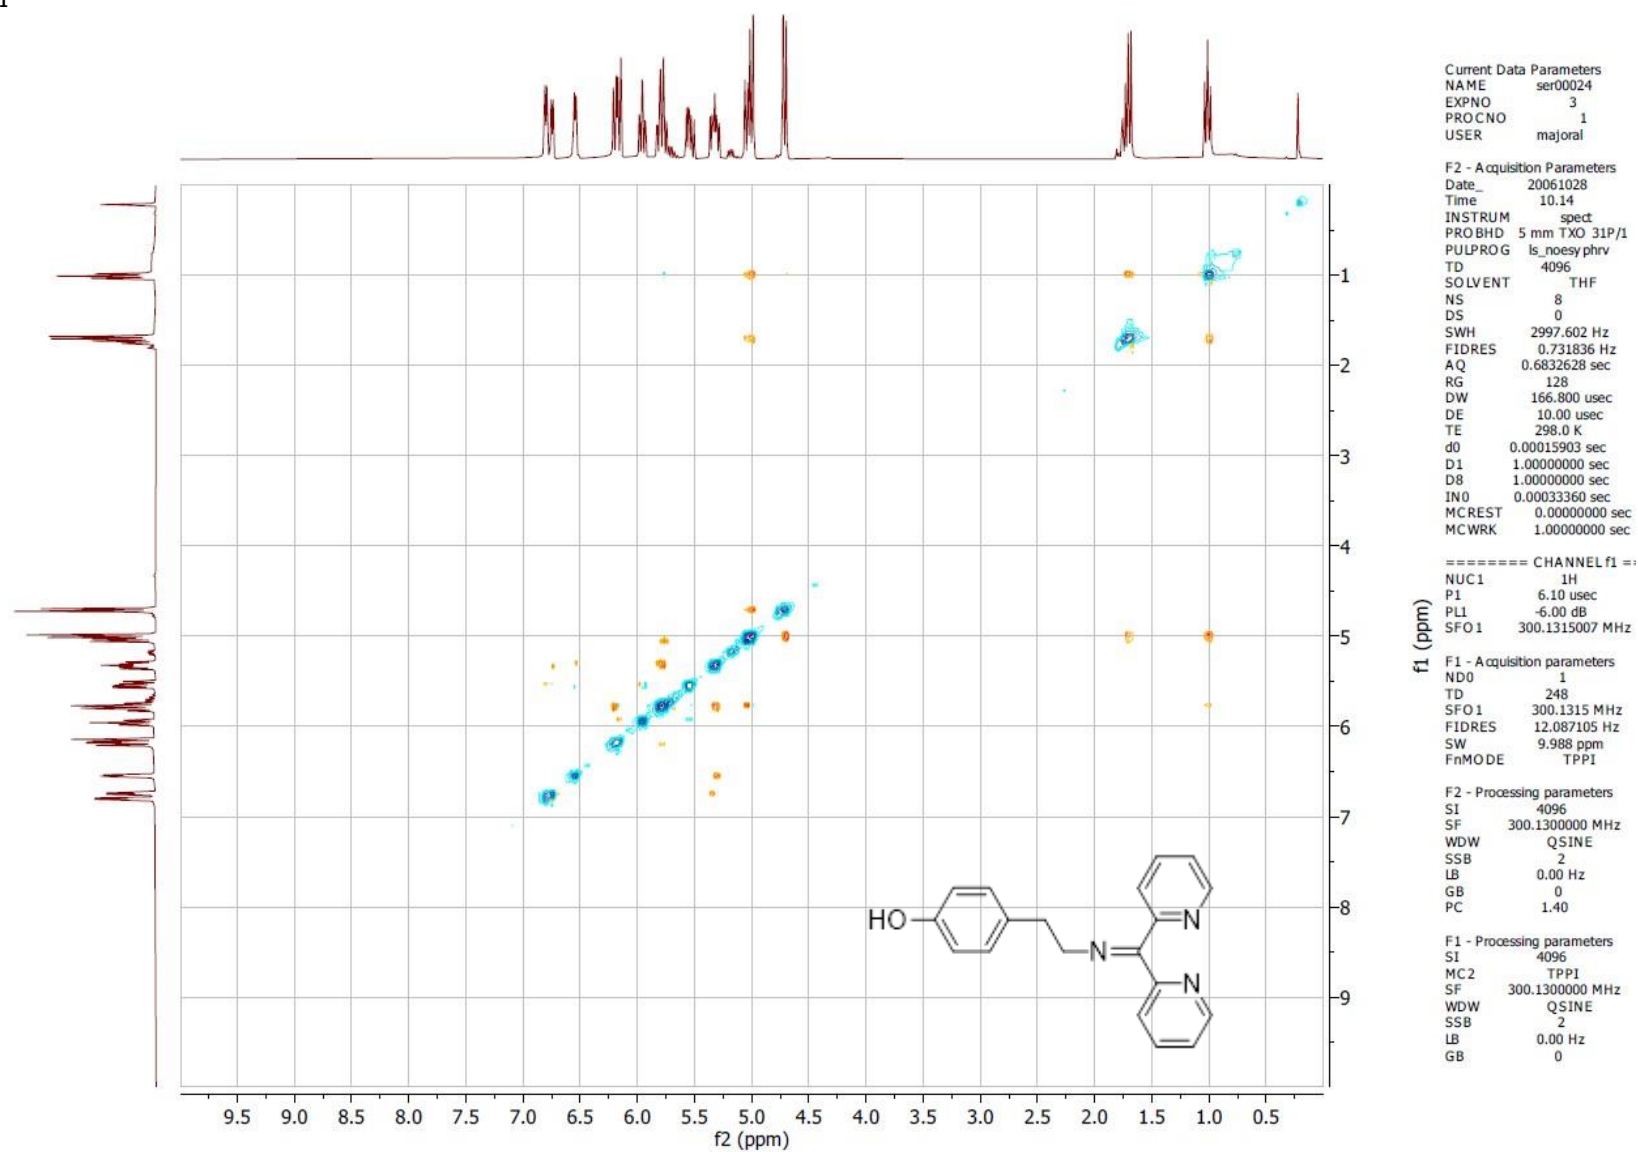



<sup>13</sup>C

{<sup>1</sup>H} NMR of Compound 3

<sup>13</sup>C

ser00022.2.fid — C13\_DECOUPLE\_H1 — C-124:2, CDCl<sub>3</sub>/THF

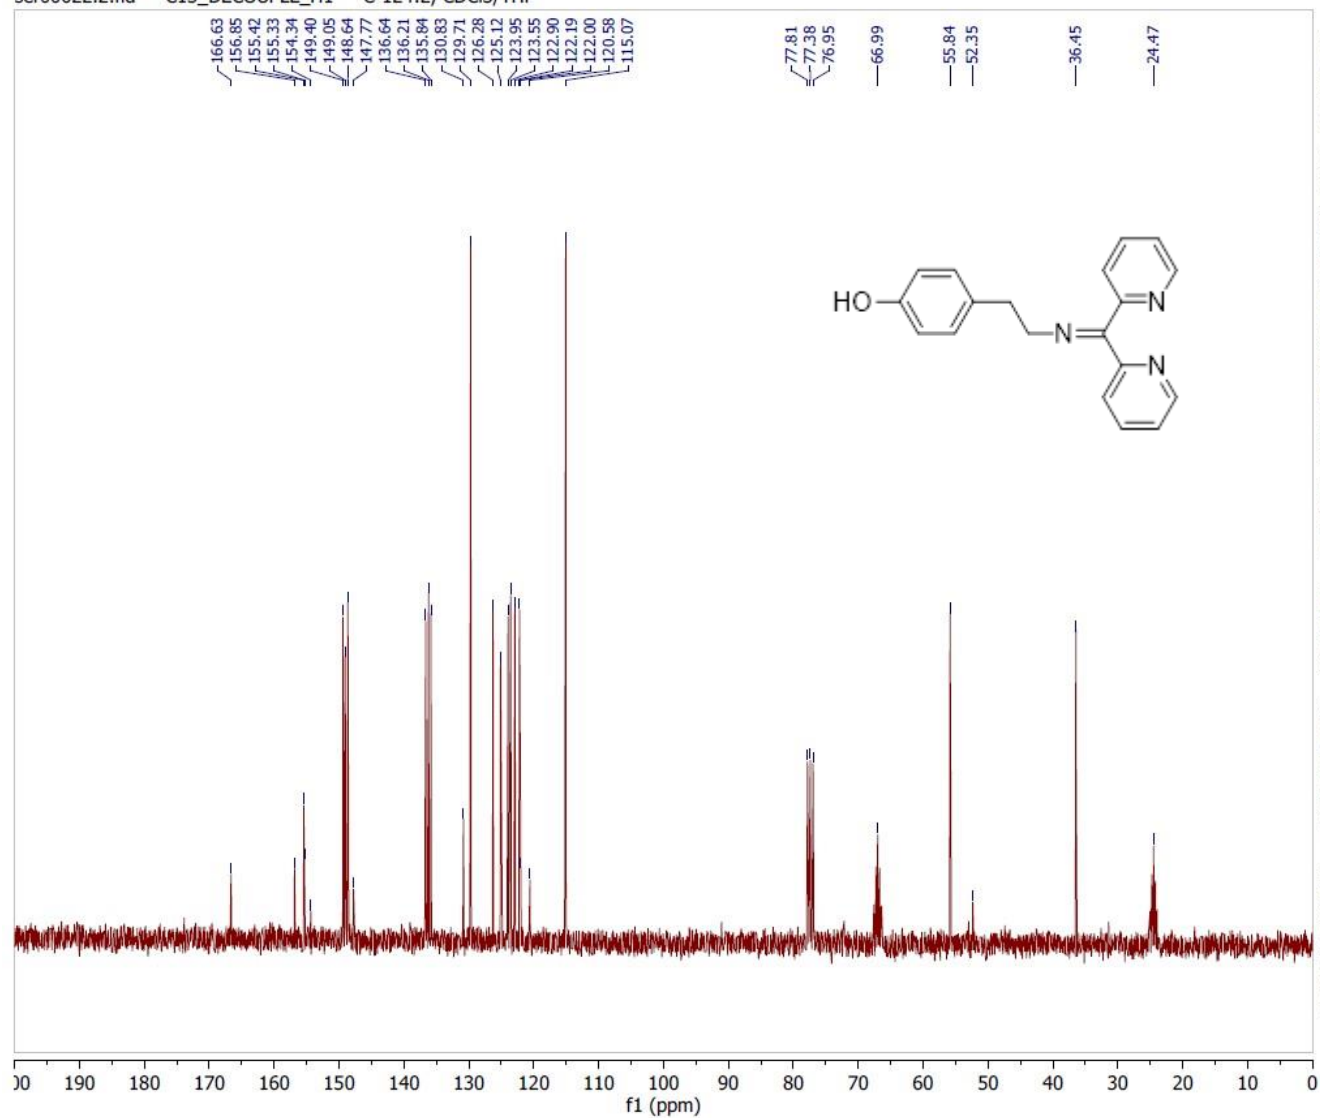

Current Data Parameters

NAME ser00022  
EXPNO 2  
PROCNO 1  
USER majoral

F2 - Acquisition Parameters

Date\_ 20061026  
Time 13.16  
INSTRUM spect  
PROBHD 5 mm TXO 31P/1  
PULPROG ls\_zg60dc  
TD 32768  
SOLVENT THF  
NS 280  
DS 0  
SWH 18832.393 Hz  
FIDRES 0.574719 Hz  
AQ 0.8700404 sec  
RG 26008  
DW 26.550 usec  
DE 10.00 usec  
TE 297.9 K  
D1 1.00000000 sec  
d11 0.03000000 sec  
MCREST 0.00000000 sec  
MCWRK 0.01500000 sec

===== CHANNEL f1 =====

NUC1 <sup>13</sup>C  
P1 7.20 usec  
PL1 -6.00 dB  
SFO1 75.4756731 MHz

===== CHANNEL f2 =====

CPDPRG2 waltz16  
NUC2 <sup>1</sup>H  
PCPD2 88.00 usec  
PL2 -6.00 dB  
PL12 17.62 dB  
SFO2 300.1312005 MHz

F2 - Processing parameters

SI 65536  
SF 75.4677490 MHz  
WDW EM  
SSB 0  
LB 1.00 Hz  
GB 0  
PC 1.40

<sup>13</sup>C

JMOD NMR of Compound 3

<sup>13</sup>C

ser00022.3.fid — C13\_JMOD\_H1 — C-124:2, CDCl<sub>3</sub>/THF

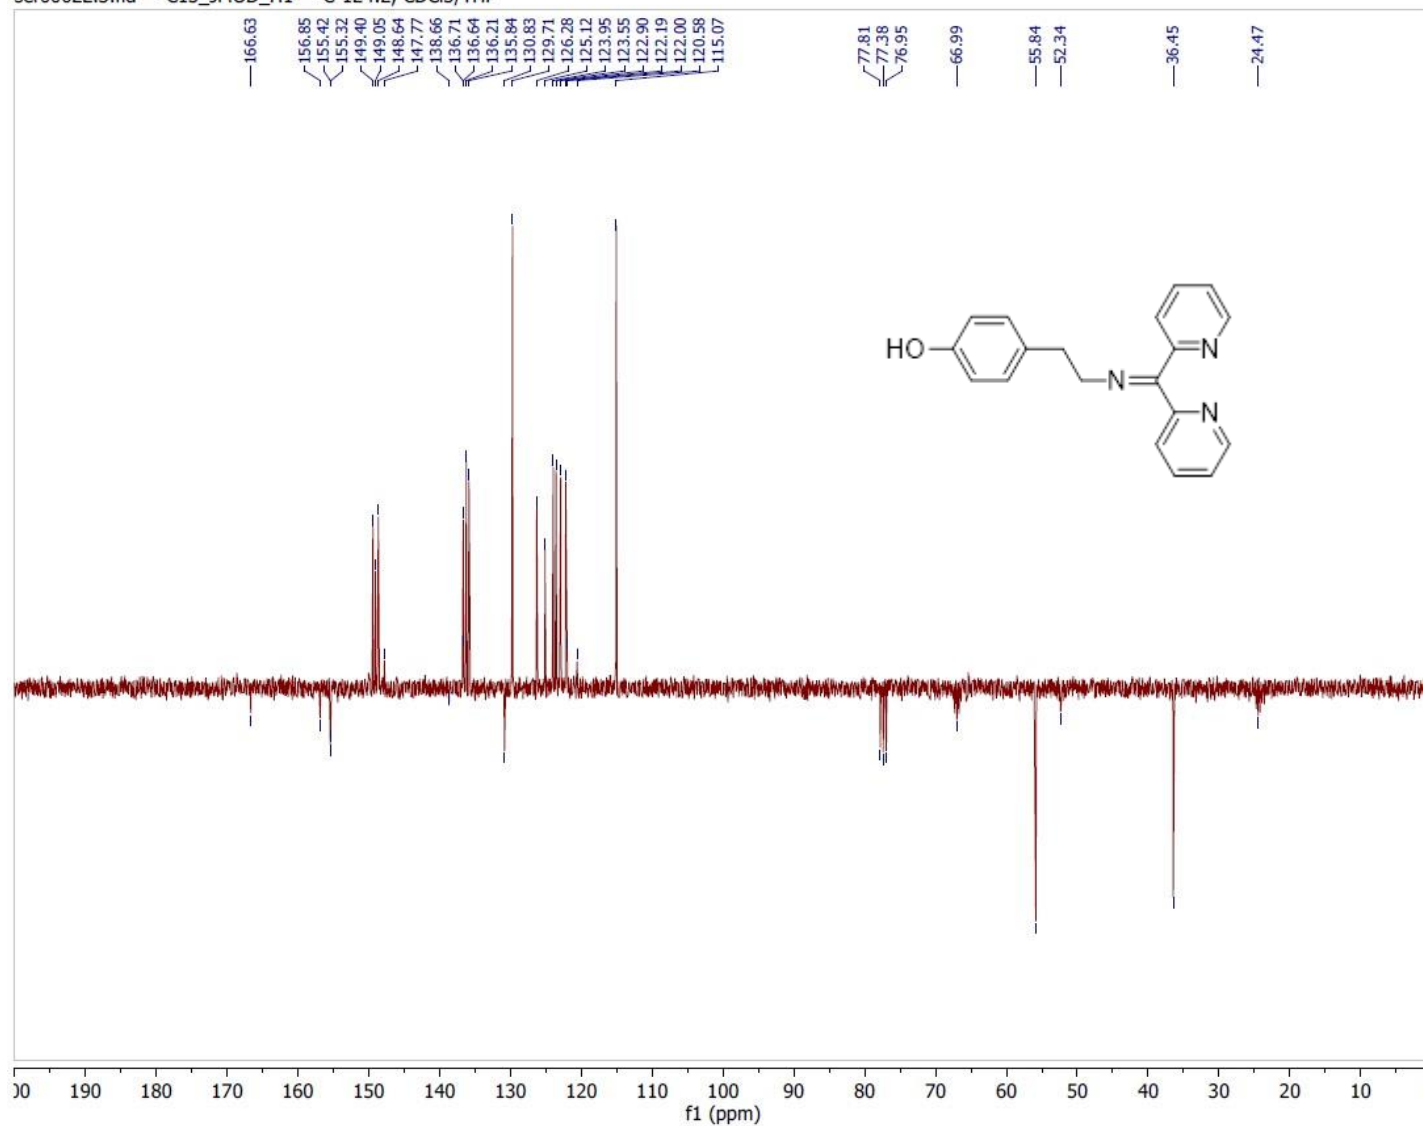

Current Data Parameters

NAME ser00022  
EXPNO 3  
PROCNO 1  
USER majoral

F2 - Acquisition Parameters

Date\_ 20061026  
Time 13.21  
INSTRUM spect  
PROBHD 5 mm TXO 31P/1  
PULPROG ls\_jmod  
TD 32768  
SOLVENT THF  
NS 251  
DS 0  
SWH 18832.393 Hz  
FIDRES 0.574719 Hz  
AQ 0.8700404 sec  
RG 32768  
DW 26.550 usec  
DE 10.00 usec  
TE 297.9 K  
CNST2 145.0000000  
CNST11 1.0000000  
D1 1.0000000 sec  
d20 0.00689655 sec  
DELTA 0.00000917 sec  
MCREST 0.00000000 sec  
MCWRK 0.01500000 sec

===== CHANNEL f1 ==

NUC1 13C  
P1 7.20 usec  
p2 14.40 usec  
PL1 -6.00 dB  
SFO1 75.4756731 MHz

===== CHANNEL f2 ==

CPDPRG2 waltz16  
NUC2 1H  
PCPD2 88.00 usec  
PL2 -6.00 dB  
PL12 17.62 dB  
SFO2 300.1312005 MHz

F2 - Processing parameters

SI 65536  
SF 75.4677490 MHz  
WDW EM  
SSB 0  
LB 1.00 Hz  
GB 0  
PC 1.40

<sup>13</sup>C

HMQC NMR of Compound 3

<sup>13</sup>C

ser00022.4.ser — C13\_HMQC\_GP\_QF — C-124:2, CDCl<sub>3</sub>/THF

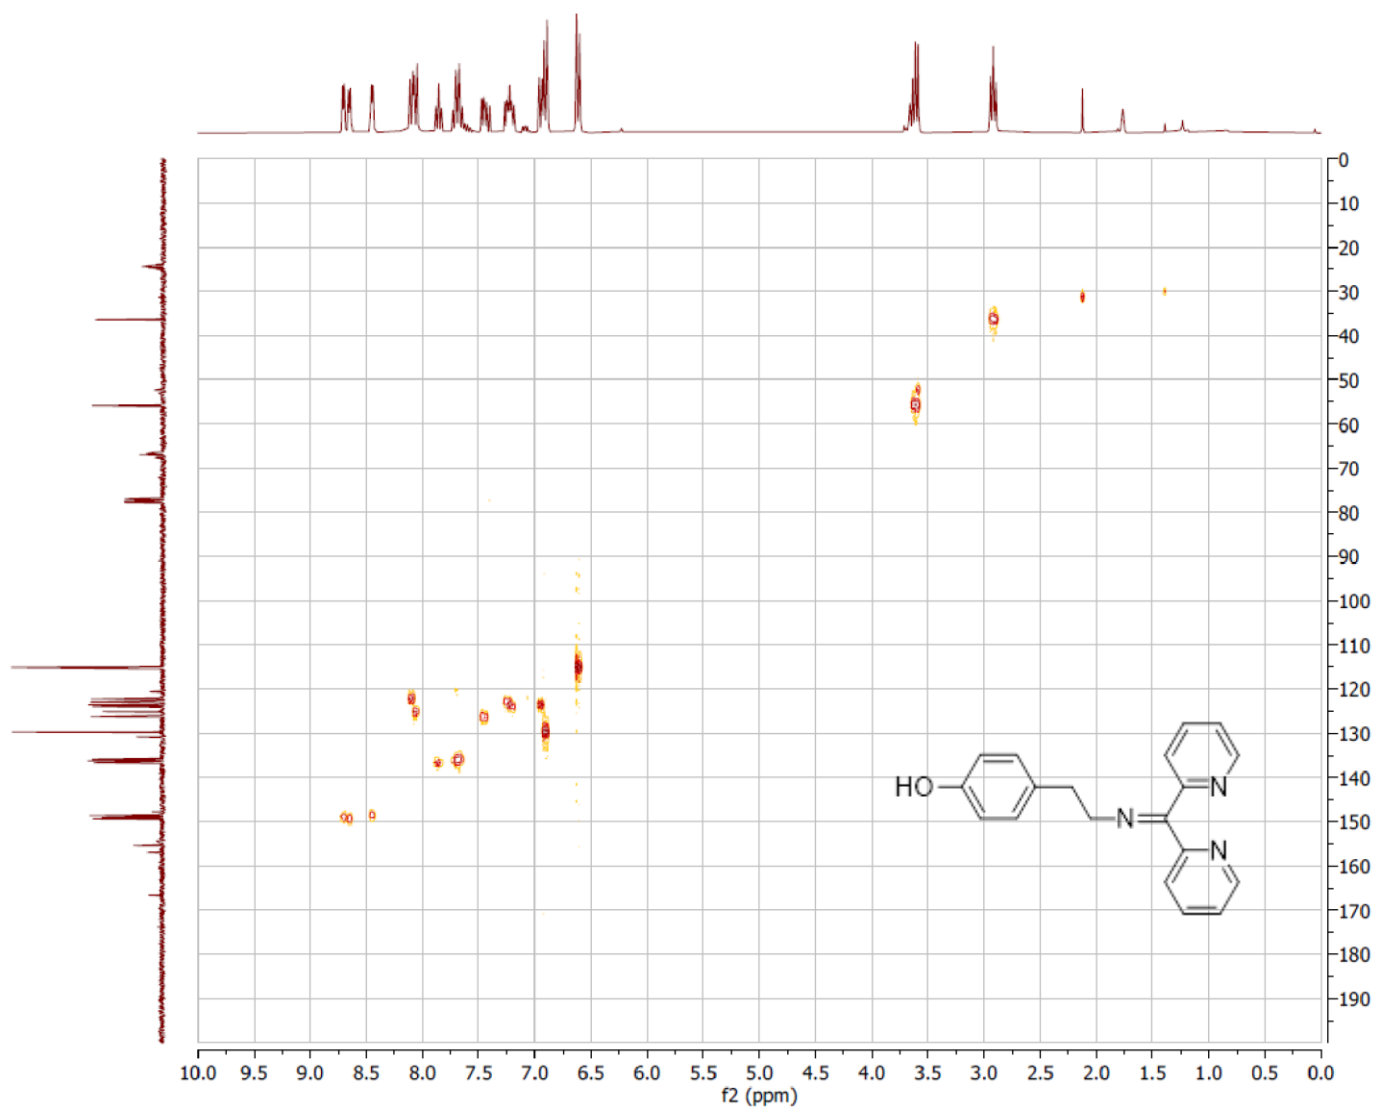

Current Data Parameters  
NAME ser00022  
EXPNO 4  
PROCNO 1  
USER majoral

F2 - Acquisition Parameters  
Date\_ 20061026  
Time 13:29  
INSTRUM spect  
PROBHD 5 mm TXO 31P/1  
PULPROG ls\_hmqcgpqf  
TD 4096  
SOLVENT THF  
NS 2  
DS 0  
SWH 3591.954 Hz  
FIDRES 0.876942 Hz  
AQ 0.5702132 sec  
RG 128  
DW 139.200 usec  
DE 10.00 usec  
TE 297.9 K  
CNST2 145.0000000  
d0 0.00000300 sec  
D1 2.00000000 sec  
d2 0.00344828 sec  
d12 0.00002000 sec  
d13 0.00000400 sec  
D16 0.00020000 sec  
DELTA1 0.00222428 sec  
IN0 0.00002650 sec  
MCREST 0.00000000 sec  
MCWRK 2.00000000 sec

===== CHANNEL f1 =====  
NUC1 1H  
P1 6.10 usec  
p2 12.20 usec  
PL1 -6.00 dB  
SFO1 300.1315007 MHz

===== CHANNEL f2 =====  
CPDPRG2 garp  
NUC2 13C  
P3 6.50 usec  
PCPD2 84.00 usec  
PL2 -6.00 dB  
PL12 16.00 dB  
SFO2 75.4756731 MHz

===== GRADIENT CHANNEL =====  
GPNAM1 SINE.100  
GPNAM2 SINE.100  
GPNAM3 SINE.100  
GPX1 0.00 %  
GPX2 0.00 %  
GPX3 0.00 %  
GPY1 0.00 %  
GPY2 0.00 %  
GPY3 0.00 %  
GPZ1 50.00 %  
GPZ2 30.00 %  
GPZ3 40.10 %  
P16 1000.00 usec

F1 - Acquisition parameters  
ND0 2  
TD 256  
SFO1 75.47567 MHz  
FIDRES 73.702827 Hz  
SW 249.987 ppm  
FIRMODE QF

F2 - Processing parameters  
SI 4096  
SF 300.1300000 MHz  
WDW QF  
SSB 2  
LB 0.00 Hz  
GB 0  
PC 1.40

F1 - Processing parameters  
SI 4096  
MC2 QF  
SF 75.4677490 MHz  
WDW QF  
SSB 2  
LB 0.00 Hz  
GB 0

$^{13}\text{C}\{^1\text{H}\}$  NMR of Compound 3

a

# <sup>1</sup>H NMR of Compound 3

hmfG0194.1.fid — AC01. Lavge DCM/Pentane — Day\_H1\_int\_MED CDCl3 /x/av400pas/data/eq\_m/nmr r.laurent 29

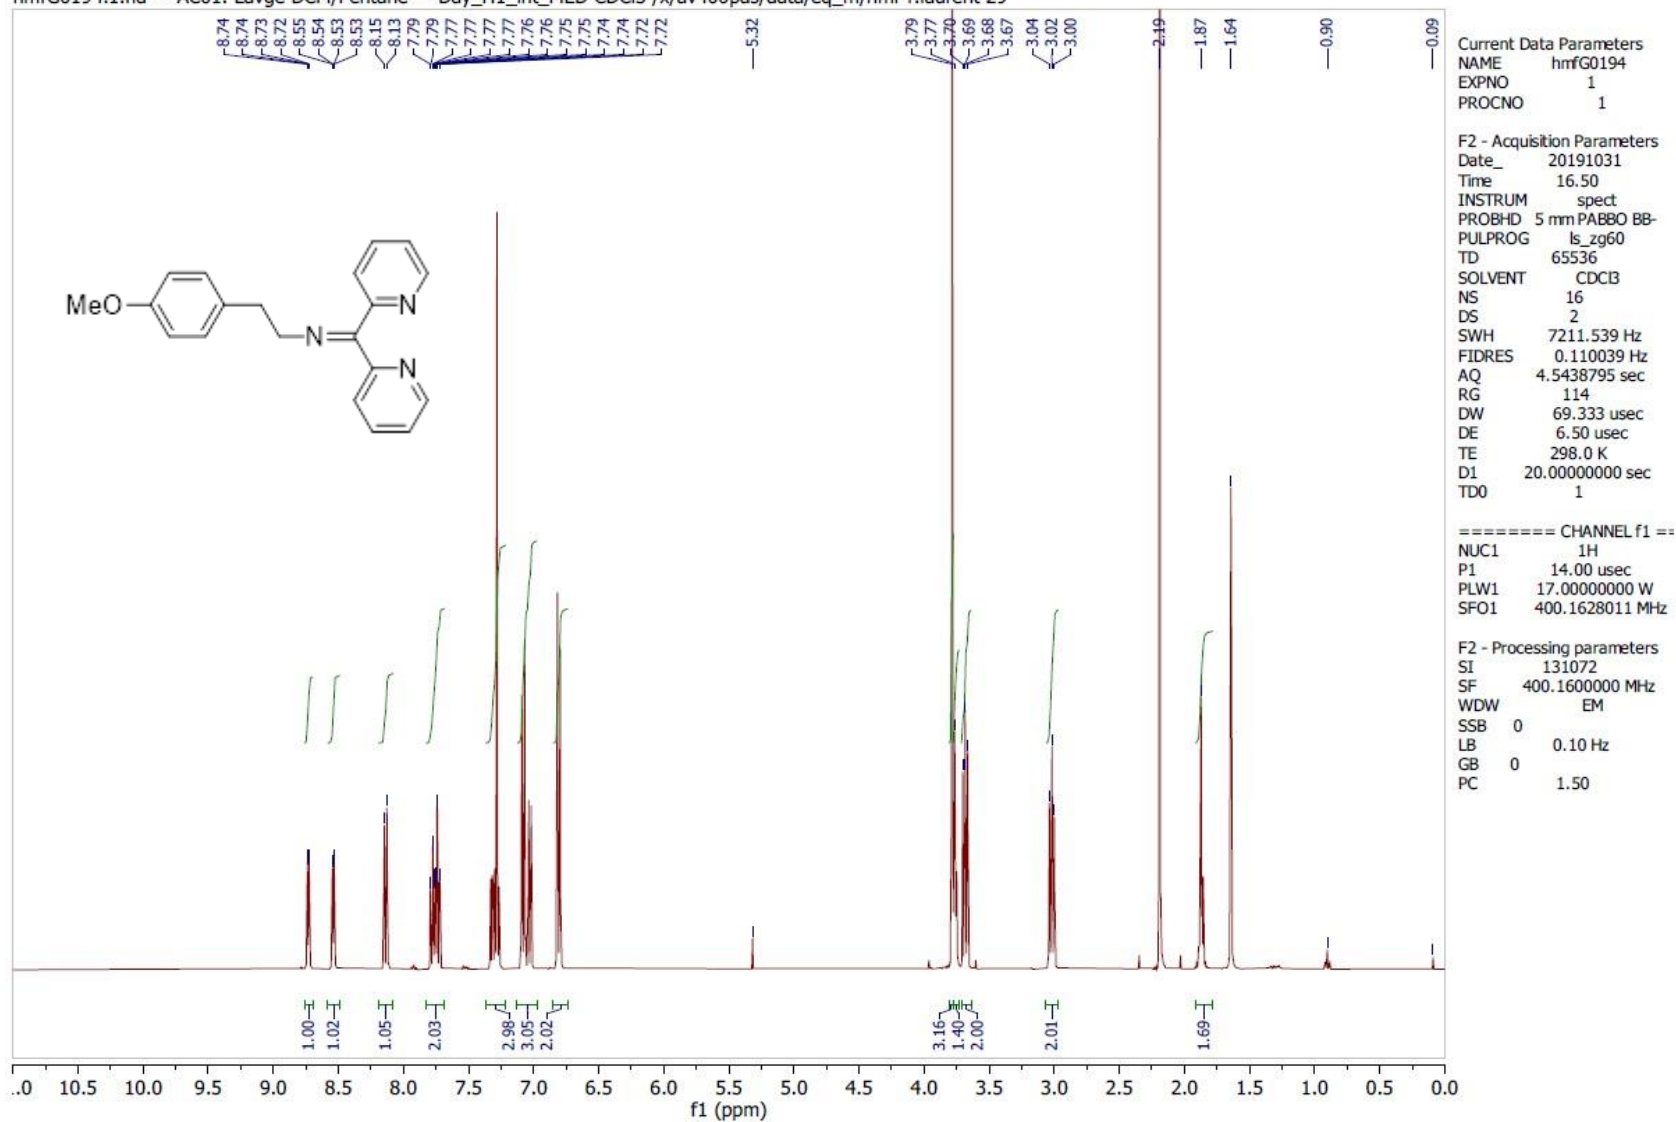



$^{13}\text{C}\{^1\text{H}\}$  NMR of Compound 3

a

# <sup>1</sup>H NMR of Compound 3

hmfG0194.2.fid — AC01. Lavge DCM/Pentane — Night\_C13\_DECOUPLE\_H1\_LONG CDCl3 /x/av400pas/data/eq\_m/nmr r.laurent 29

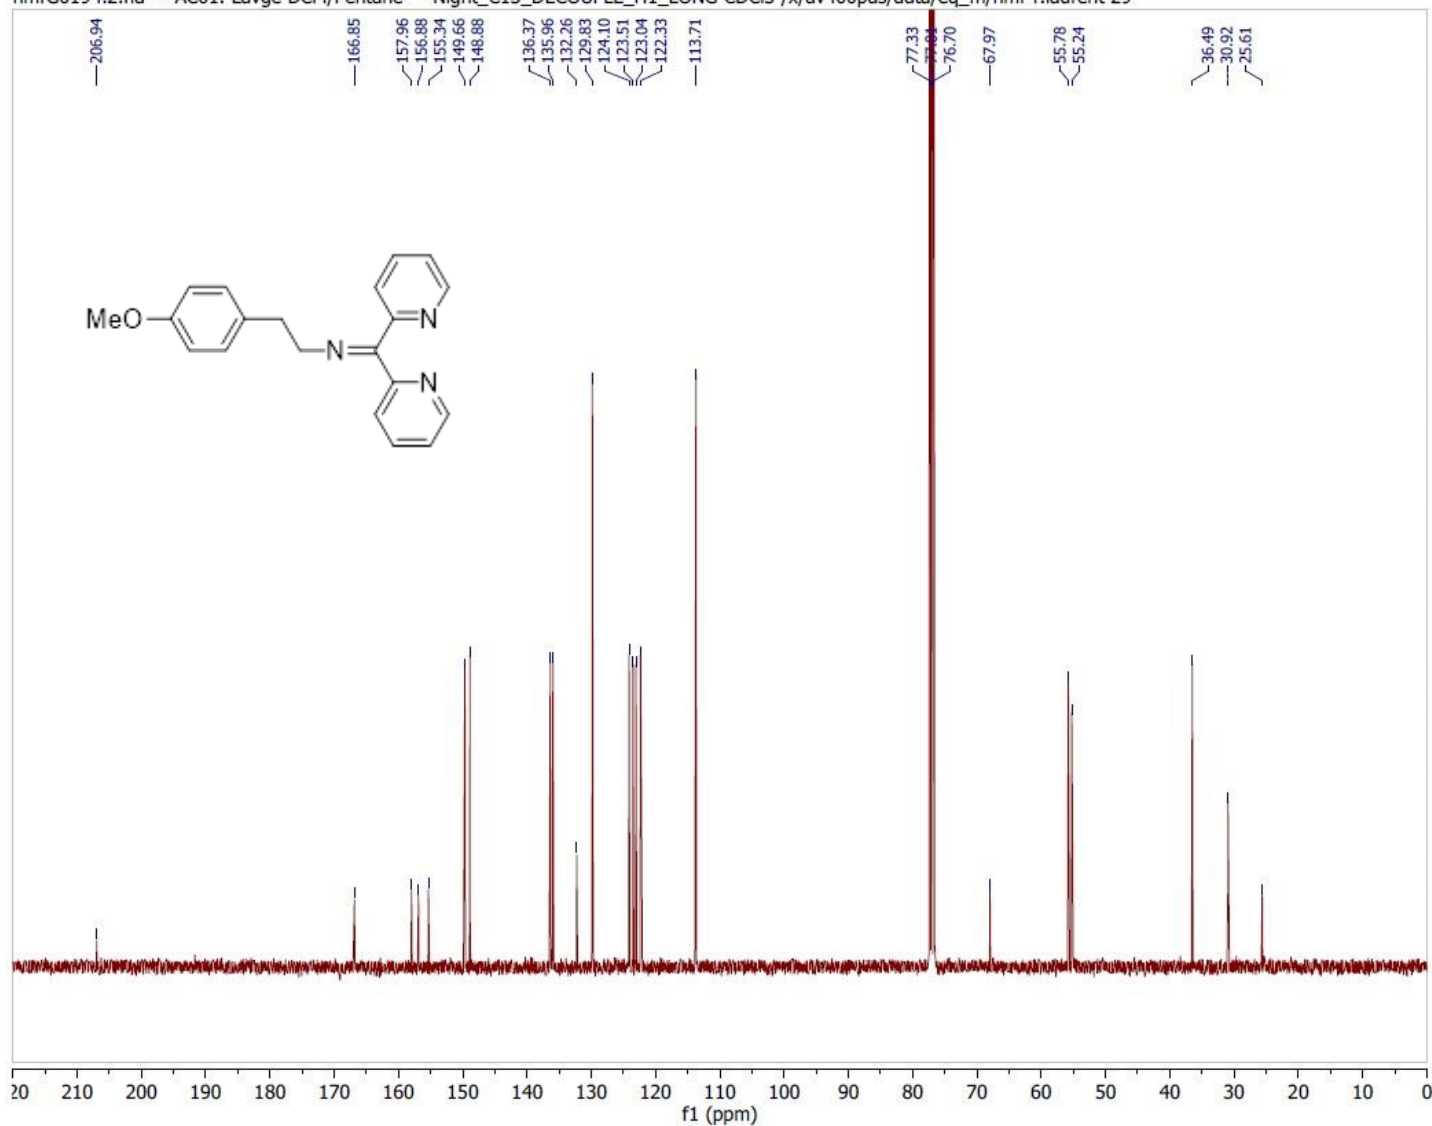

Current Data Parameters  
NAME hmfG0194  
EXPNO 2  
PROCNO 1

F2 - Acquisition Parameters  
Date\_ 20191101  
Time 3.31  
INSTRUM spect  
PROBHD 5 mm PABBO BB-  
PULPROG ls\_zgdc60  
TD 65536  
SOLVENT CDCl3  
NS 3000  
DS 4  
SWH 23148.148 Hz  
FIDRES 0.353213 Hz  
AQ 1.4156276 sec  
RG 2050  
DW 21.600 usec  
DE 6.50 usec  
TE 298.0 K  
D1 1.00000000 sec  
D11 0.03000000 sec  
TD0 1

===== CHANNEL f1 ==  
NUC1 13C  
P1 9.30 usec  
PLW1 70.00000000 W  
SFO1 100.6308781 MHz

===== CHANNEL f2 ==  
CPDPRG2 waltz16  
NUC2 1H  
PCPD2 90.00 usec  
PLW2 17.00000000 W  
PLW12 0.41136000 W  
SFO2 400.1616006 MHz

F2 - Processing parameters  
SI 131072  
SF 100.6203130 MHz  
WDW EM  
SSB 0  
LB 1.00 Hz  
GB 0  
PC 1.50

$^{13}\text{C}\{^1\text{H}\}$  NMR of Compound 3  
-Pd

<sup>1</sup>H NMR of Compound 3

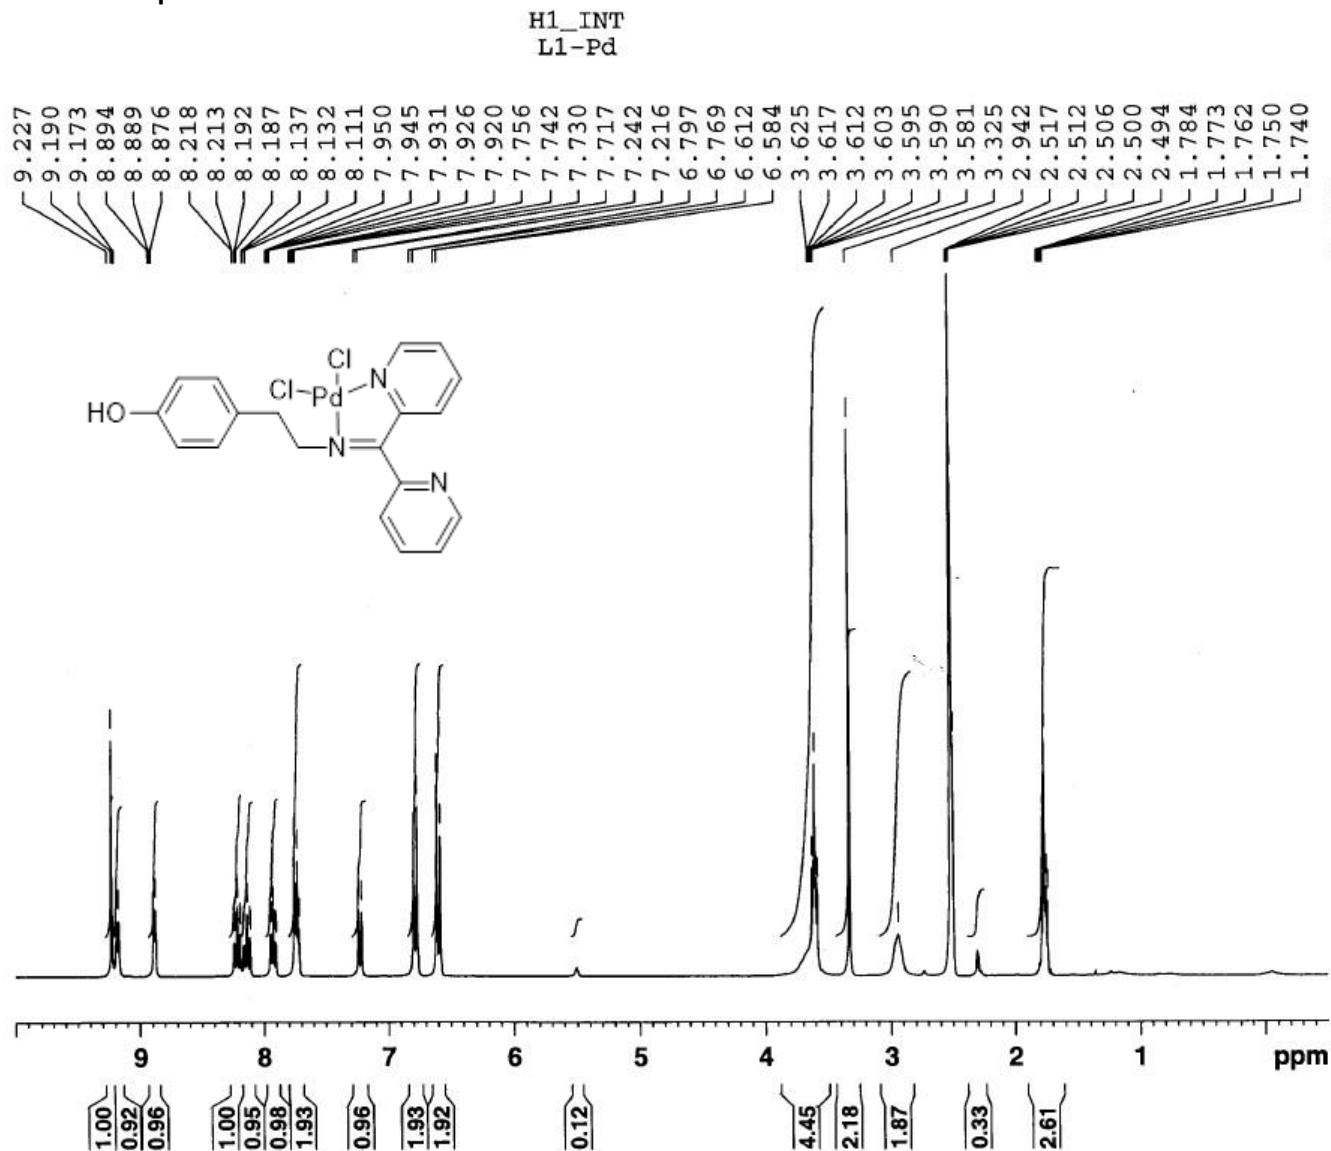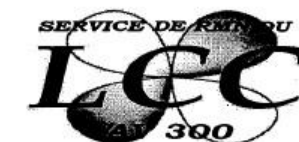

Current Data Parameters  
NAME hmfC0077  
EXPNO 3  
PROCNO 1  
USER majoral

F2 - Acquisition Parameters  
Date\_ 20080403  
Time 8.29  
INSTRUM spect  
PROBHD 5 mm TXO 31P/1  
PULPROG ls\_zg60  
TD 32768  
SOLVENT DMSO  
NS 16  
DS 2  
SWH 5411.255 Hz  
FIDRES 0.165138 Hz  
AQ 3.0278132 sec  
RG 287.4  
DW 92.400 usec  
DE 10.00 usec  
TE 298.0 K  
D1 10.00000000 sec  
MCREST 0.00000000 sec  
MCWRK 0.01500000 sec

===== CHANNEL f1 =====  
NUC1 1H  
P1 10.20 usec  
PL1 -2.00 dB  
SFO1 300.1318008 MHz

F2 - Processing parameters  
SI 32768  
SF 300.1300000 MHz  
WDW EM  
SSB 0  
LB 0.10 Hz  
GB 0  
PC 1.40

$^{13}\text{C}\{^1\text{H}\}$  NMR of Compound 3  
-Pd

<sup>1</sup>H NMR of Compound 3

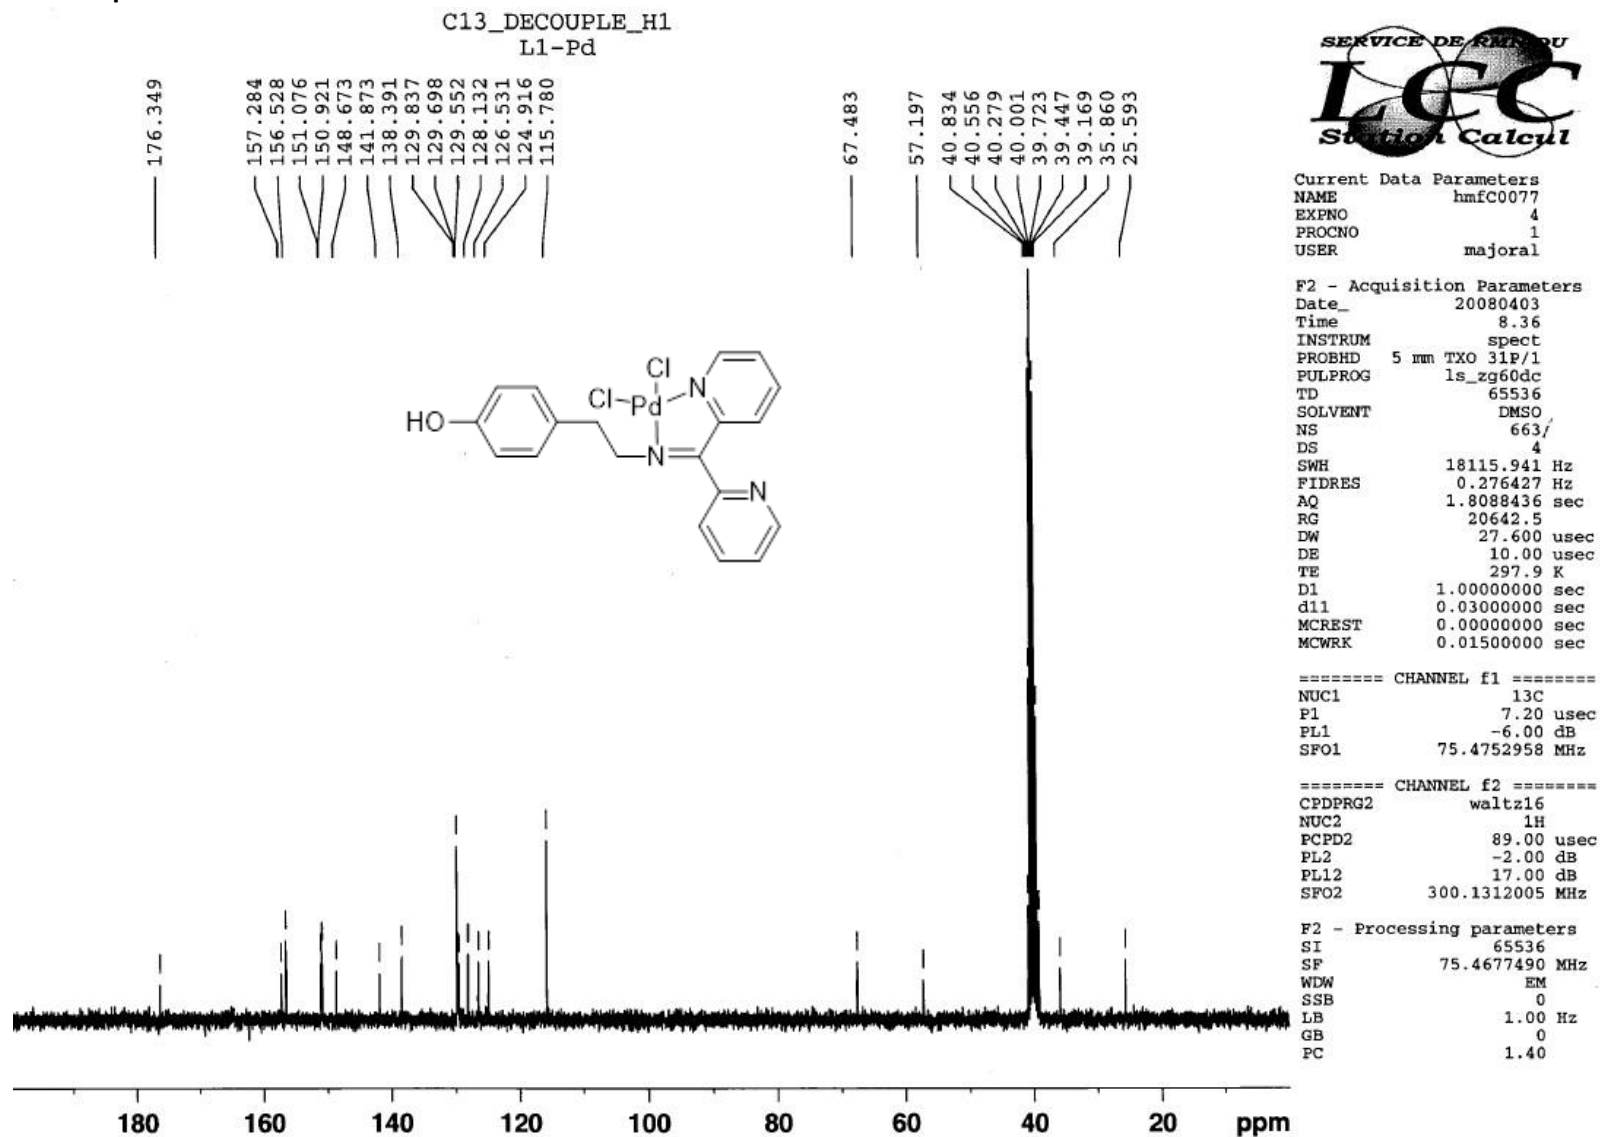

**$^{13}\text{C}\{^1\text{H}\}$  NMR of Compound 3**  
**a-Pd**

# <sup>1</sup>H NMR of Compound 3

hmfL0087.1.fid — H1\_INT — AC03

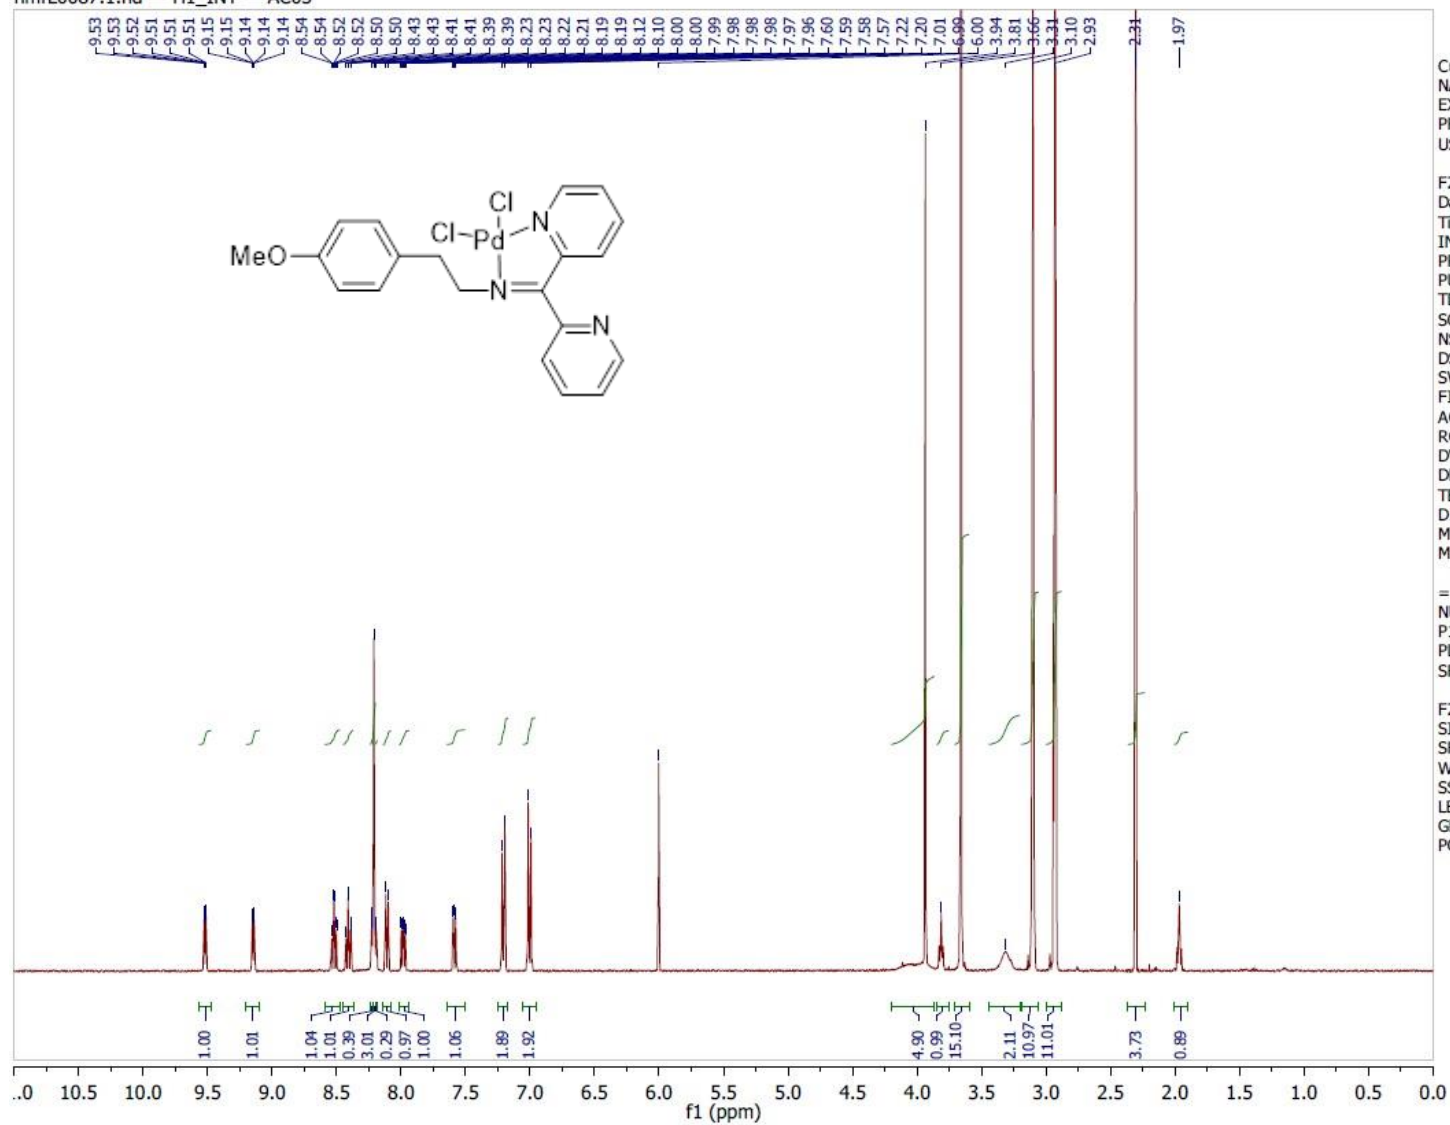

Current Data Parameters  
NAME hmfL0087  
EXPNO 1  
PROCNO 1  
USER eq\_m

F2 - Acquisition Parameters  
Date\_ 20191118  
Time 18.05  
INSTRUM spect  
PROBHD 5 mm TBO BB-1H  
PULPROG ls\_zg60  
TD 32768  
SOLVENT DMF  
NS 8  
DS 0  
SWH 7183.908 Hz  
FIDRES 0.219235 Hz  
AQ 2.2807028 sec  
RG 512  
DW 69.600 usec  
DE 10.00 usec  
TE 298.0 K  
D1 20.00000000 sec  
MCREST 0.00000000 sec  
MCWRK 0.01500000 sec

===== CHANNEL f1 =====  
NUC1 1H  
P1 9.50 usec  
PL1 -1.00 dB  
SFO1 400.1324008 MHz

F2 - Processing parameters  
SI 65536  
SF 400.1300000 MHz  
WDW EM  
SSB 0  
LB 0.10 Hz  
GB 0  
PC 1.40



**$^{13}\text{C}\{^1\text{H}\}$  NMR of Compound 3**  
**a-Pd**

# <sup>1</sup>H NMR of Compound 3

hmfL0087.2.fid — C13\_DECOUPLE\_H1 — AC03

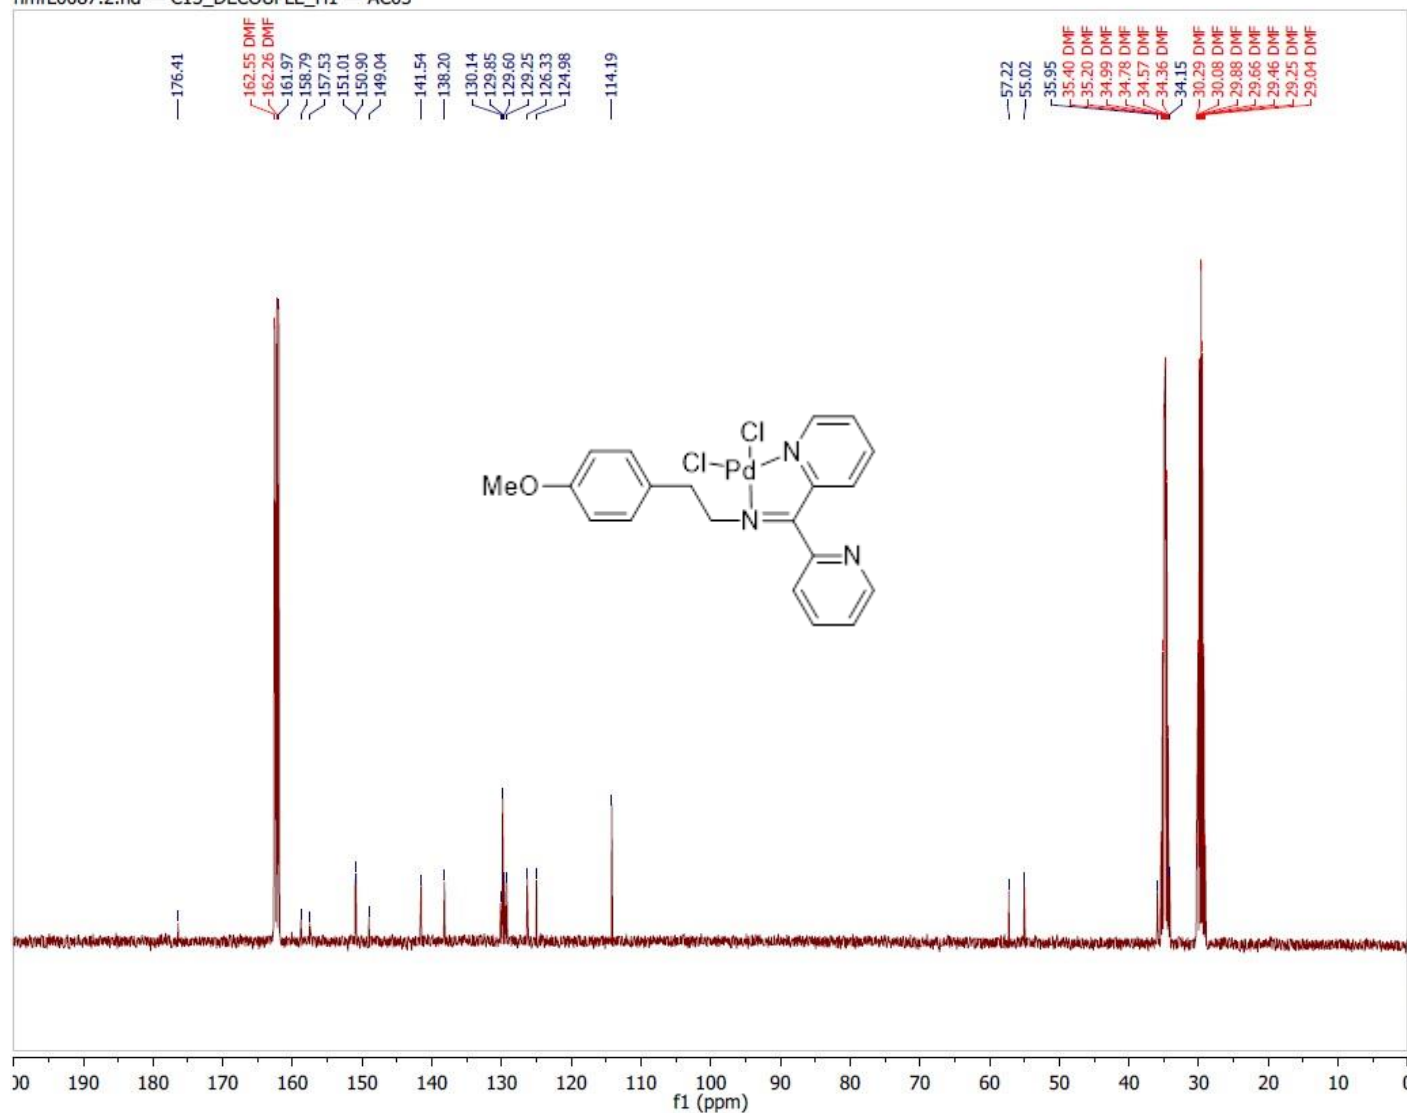

## Current Data Parameters

NAME hmfL0087  
EXPNO 2  
PROCNO 1  
USER eq\_m

## F2 - Acquisition Parameters

Date\_ 20191118  
Time 21.09  
INSTRUM spect  
PROBHD 5 mm TBO BB-1H  
PULPROG ls\_zg60dc  
TD 32768  
SOLVENT DMF  
NS 6400  
DS 4  
SWH 25125.629 Hz  
FIDRES 0.766773 Hz  
AQ 0.6521332 sec  
RG 26008  
DW 19.900 usec  
DE 10.00 usec  
TE 297.9 K  
D1 1.00000000 sec  
d11 0.03000000 sec  
MCREST 0.00000000 sec  
MCWRK 0.01500000 sec

## ===== CHANNEL f1 =====

NUC1 13C  
P1 10.00 usec  
PL1 2.00 dB  
SFO1 100.6233333 MHz

## ===== CHANNEL f2 =====

CPDPRG2 waltz16  
NUC2 1H  
PCPD2 92.00 usec  
PL2 -1.00 dB  
PL12 18.45 dB  
SFO2 400.1318006 MHz

## F2 - Processing parameters

SI 65536  
SF 100.6127690 MHz  
WDW EM  
SSB 0  
LB 1.00 Hz  
GB 0  
PC 0.30

## H NMR of Compound 4

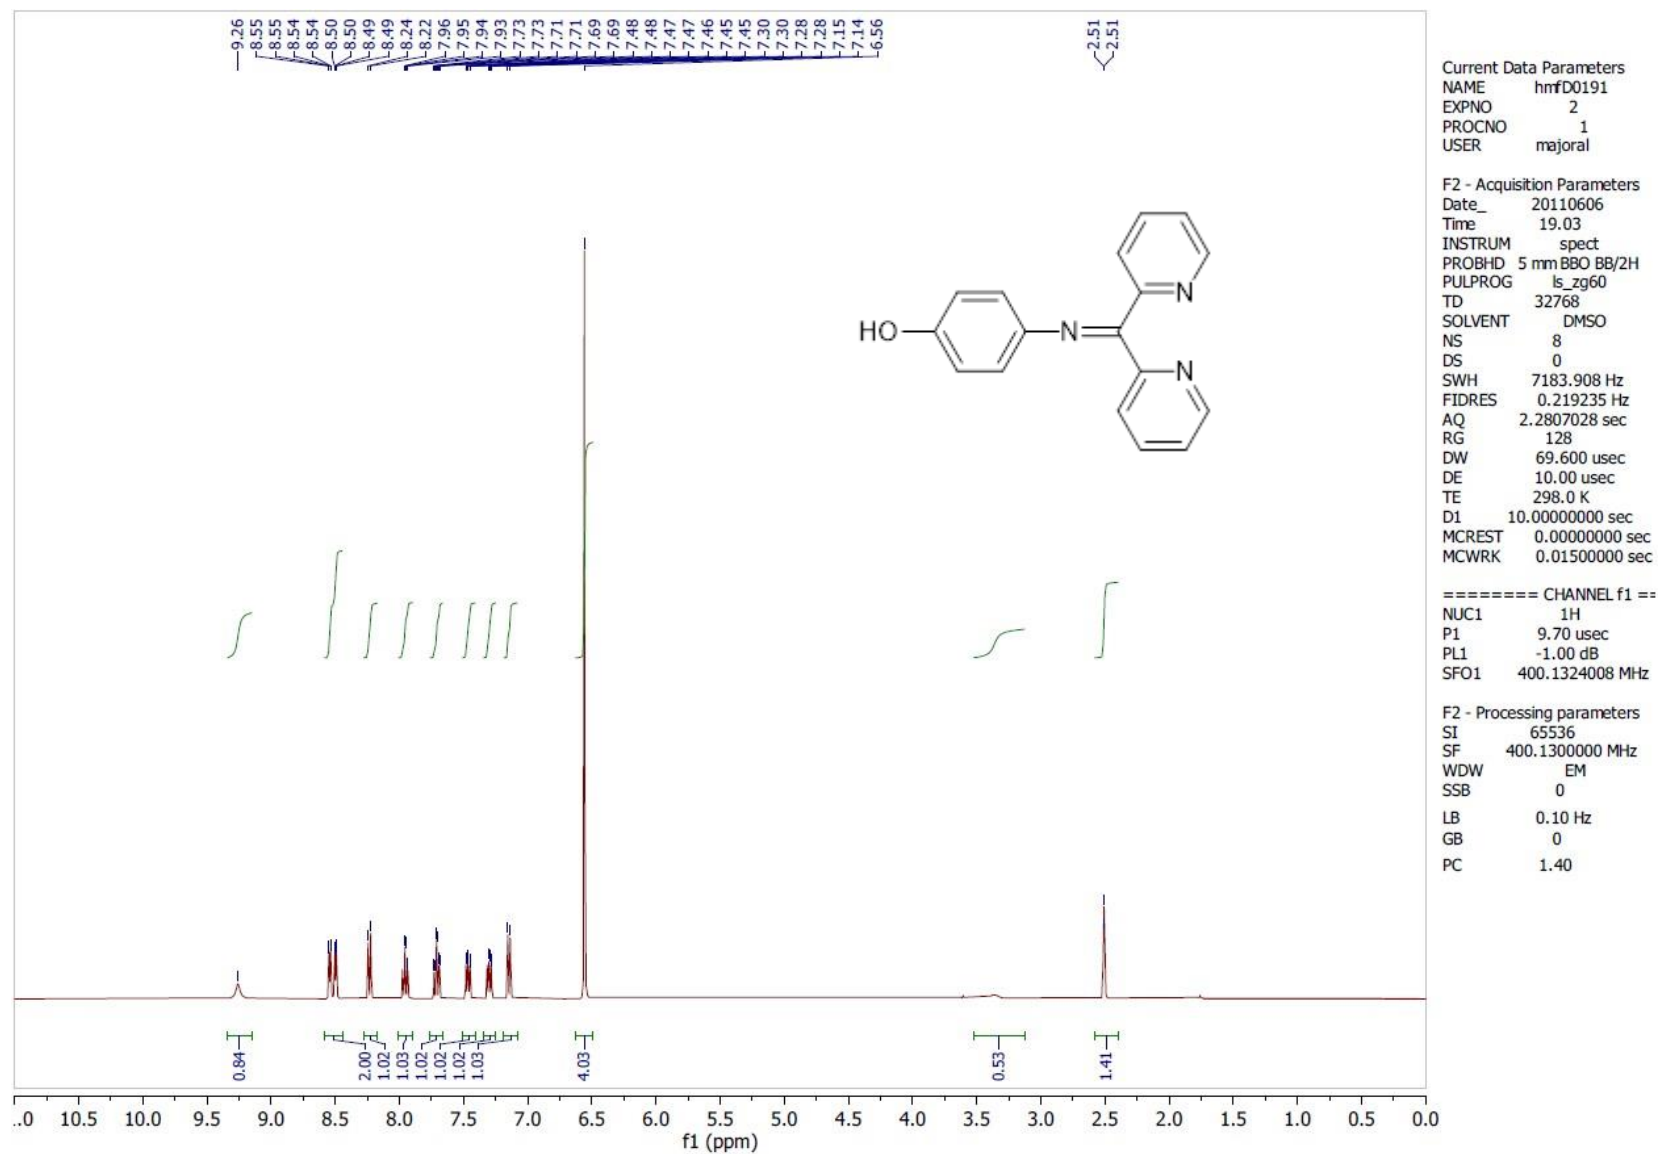

# <sup>1</sup>H COSY NMR of Compound 4

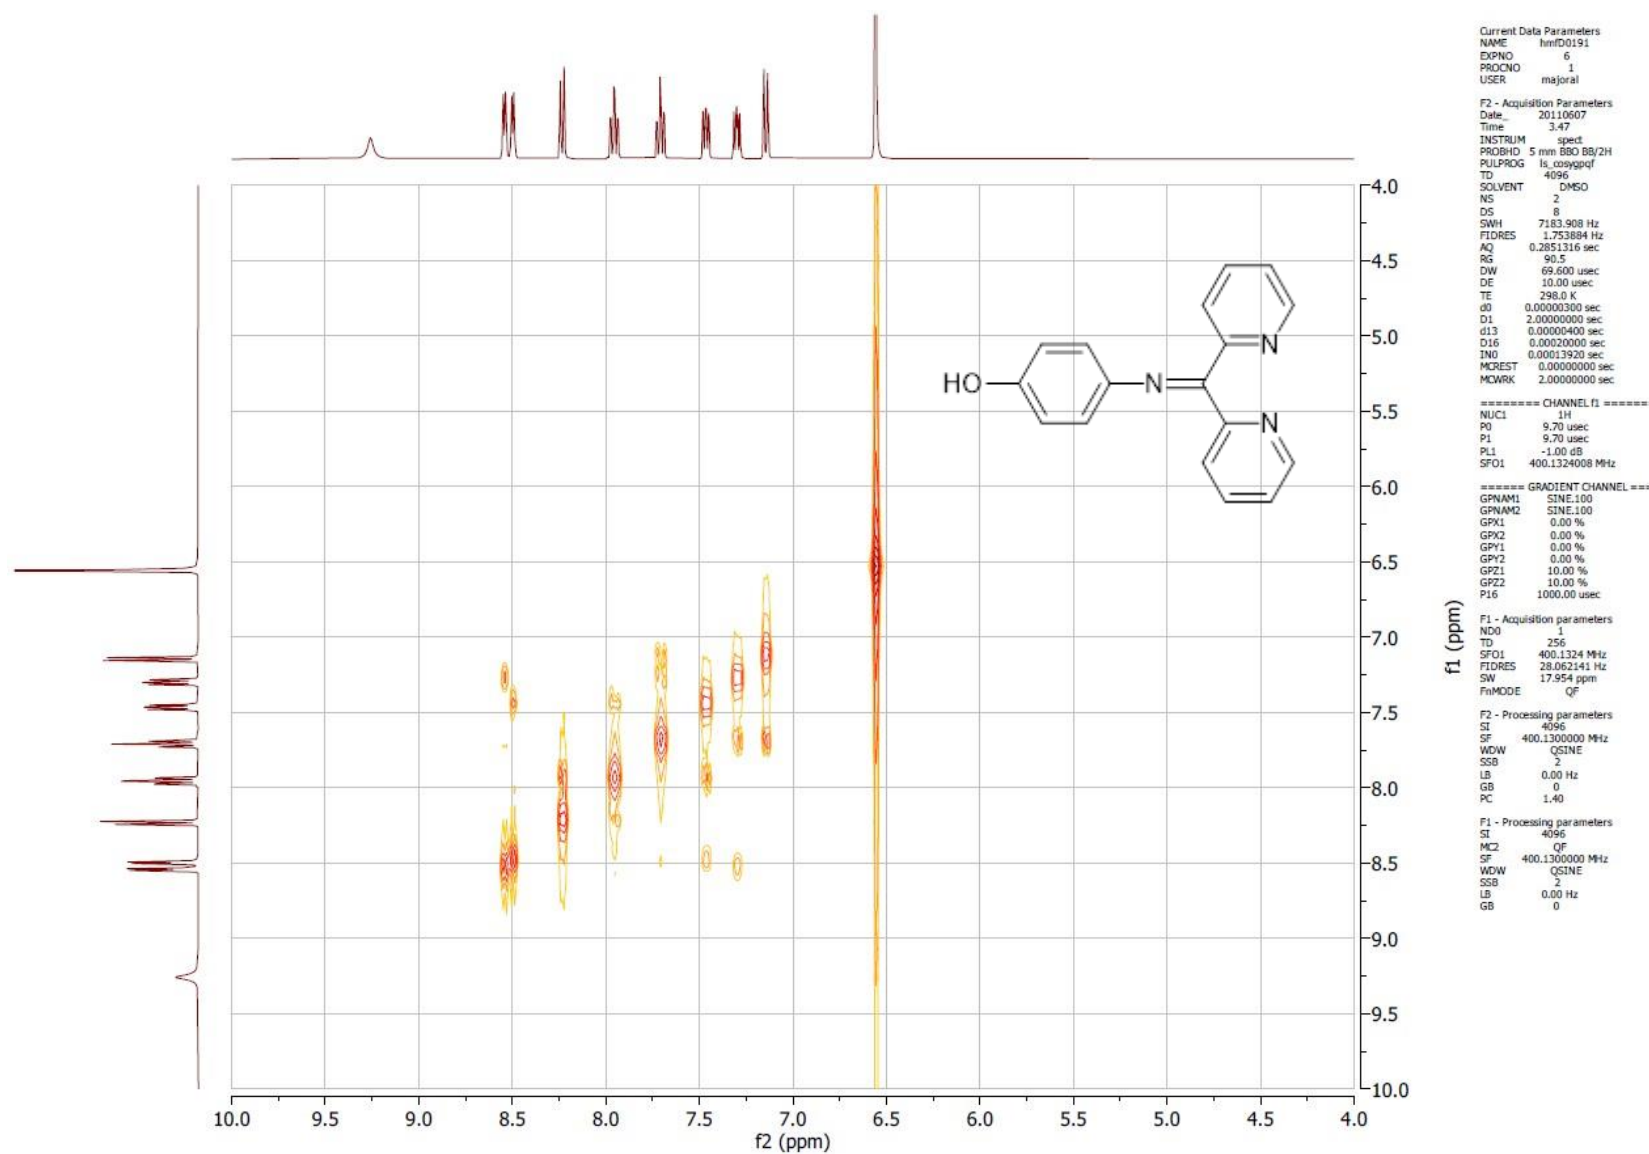

<sup>13</sup>C{<sup>1</sup>H} NMR of Compound 4

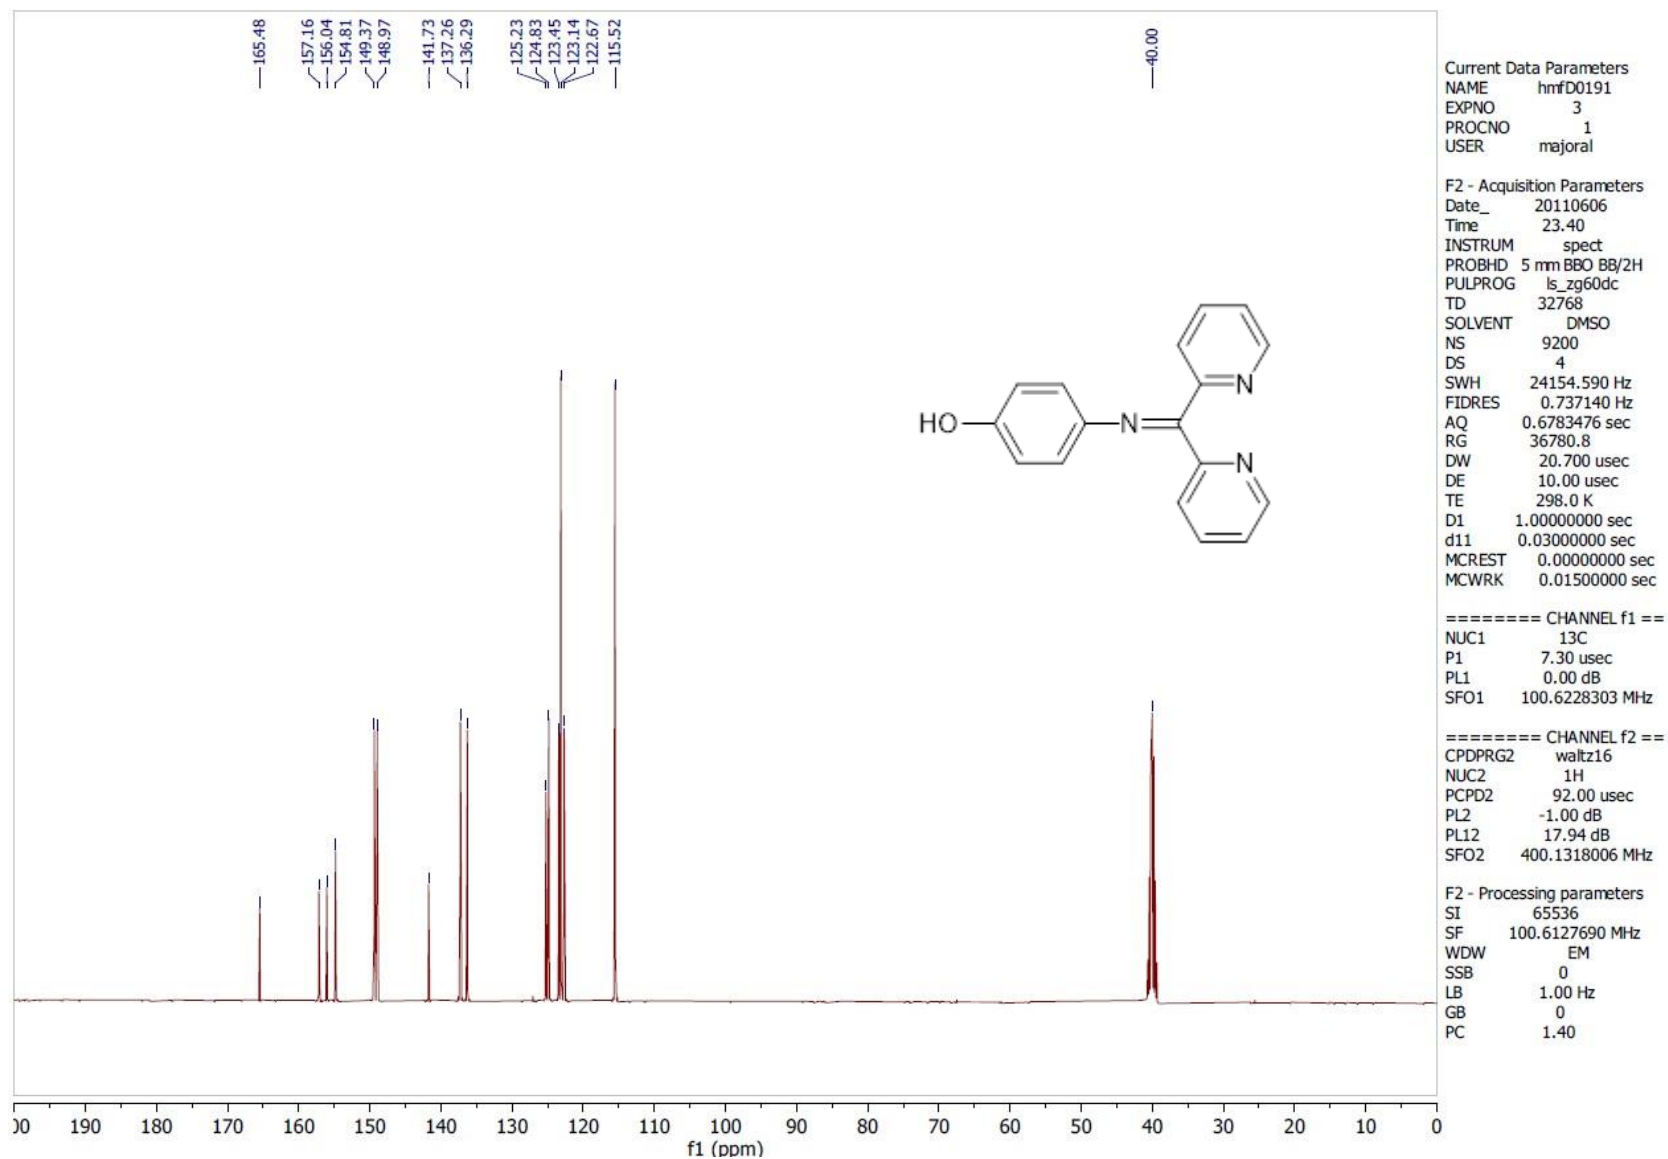

<sup>13</sup>C HMQC NMR of Compound 4

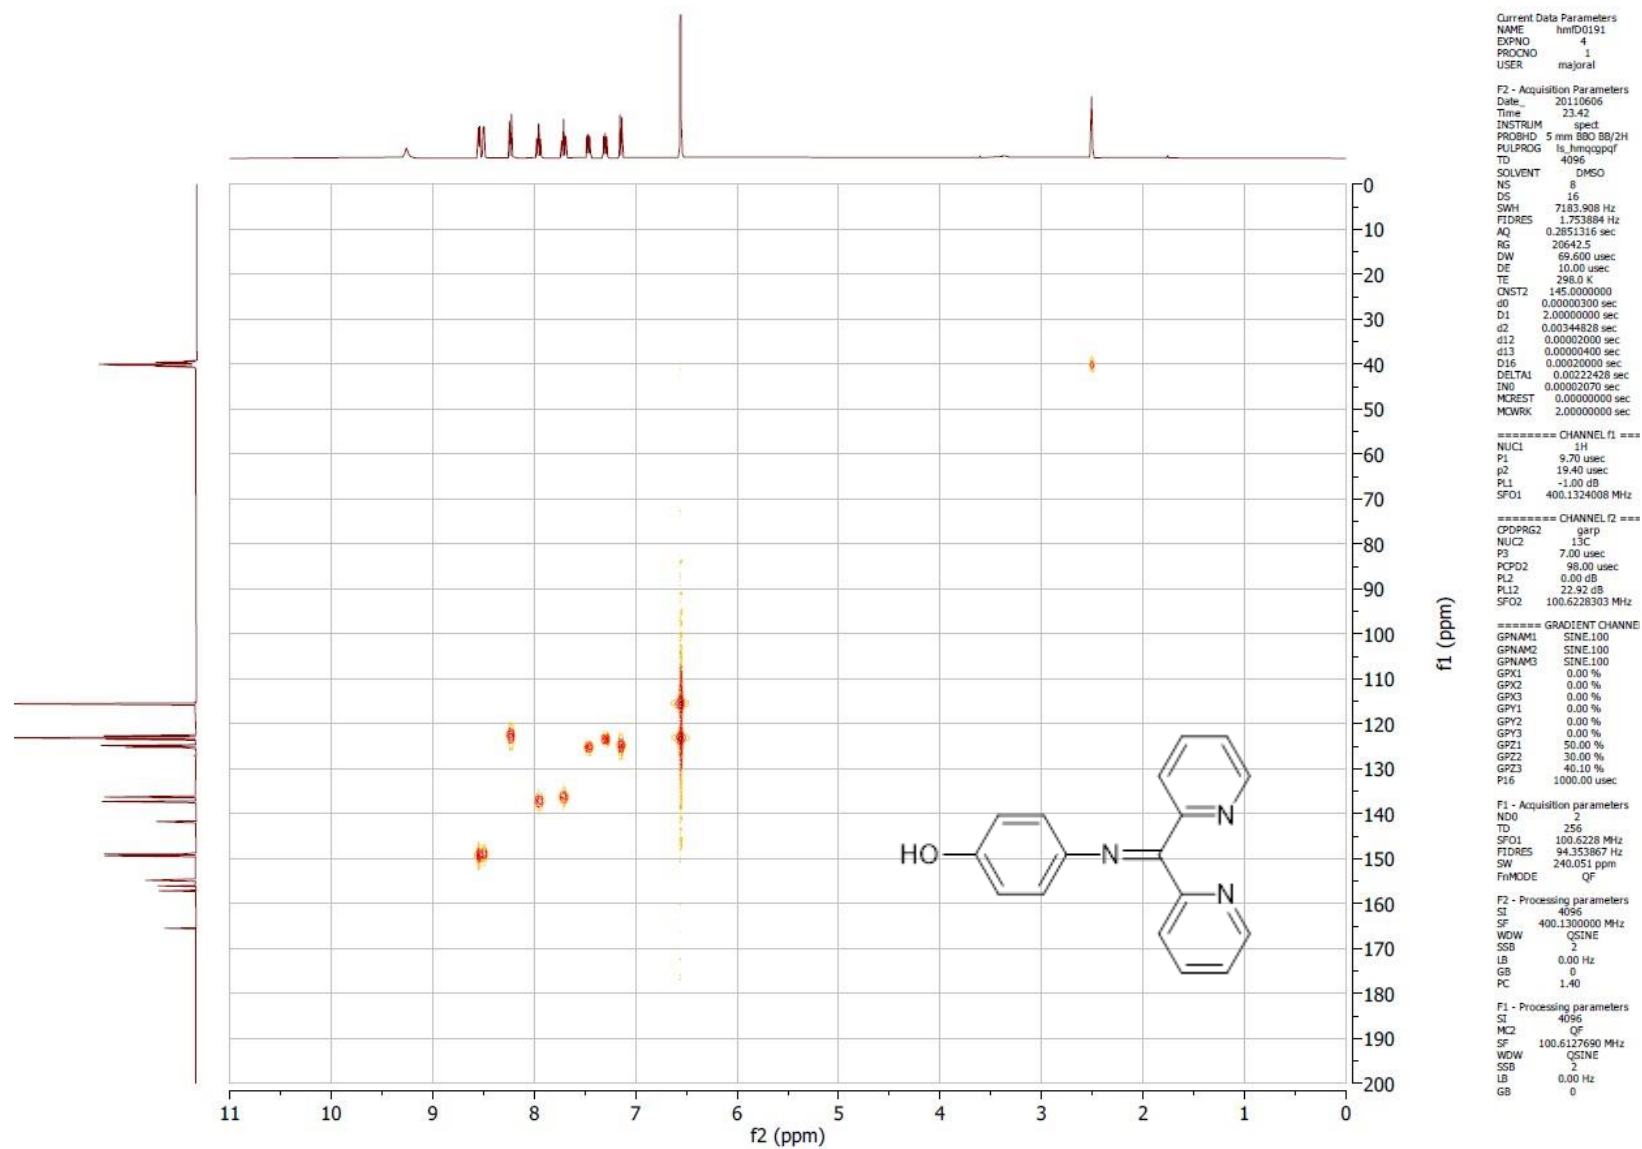

<sup>13</sup>C HMQC long range NMR of Compound 4

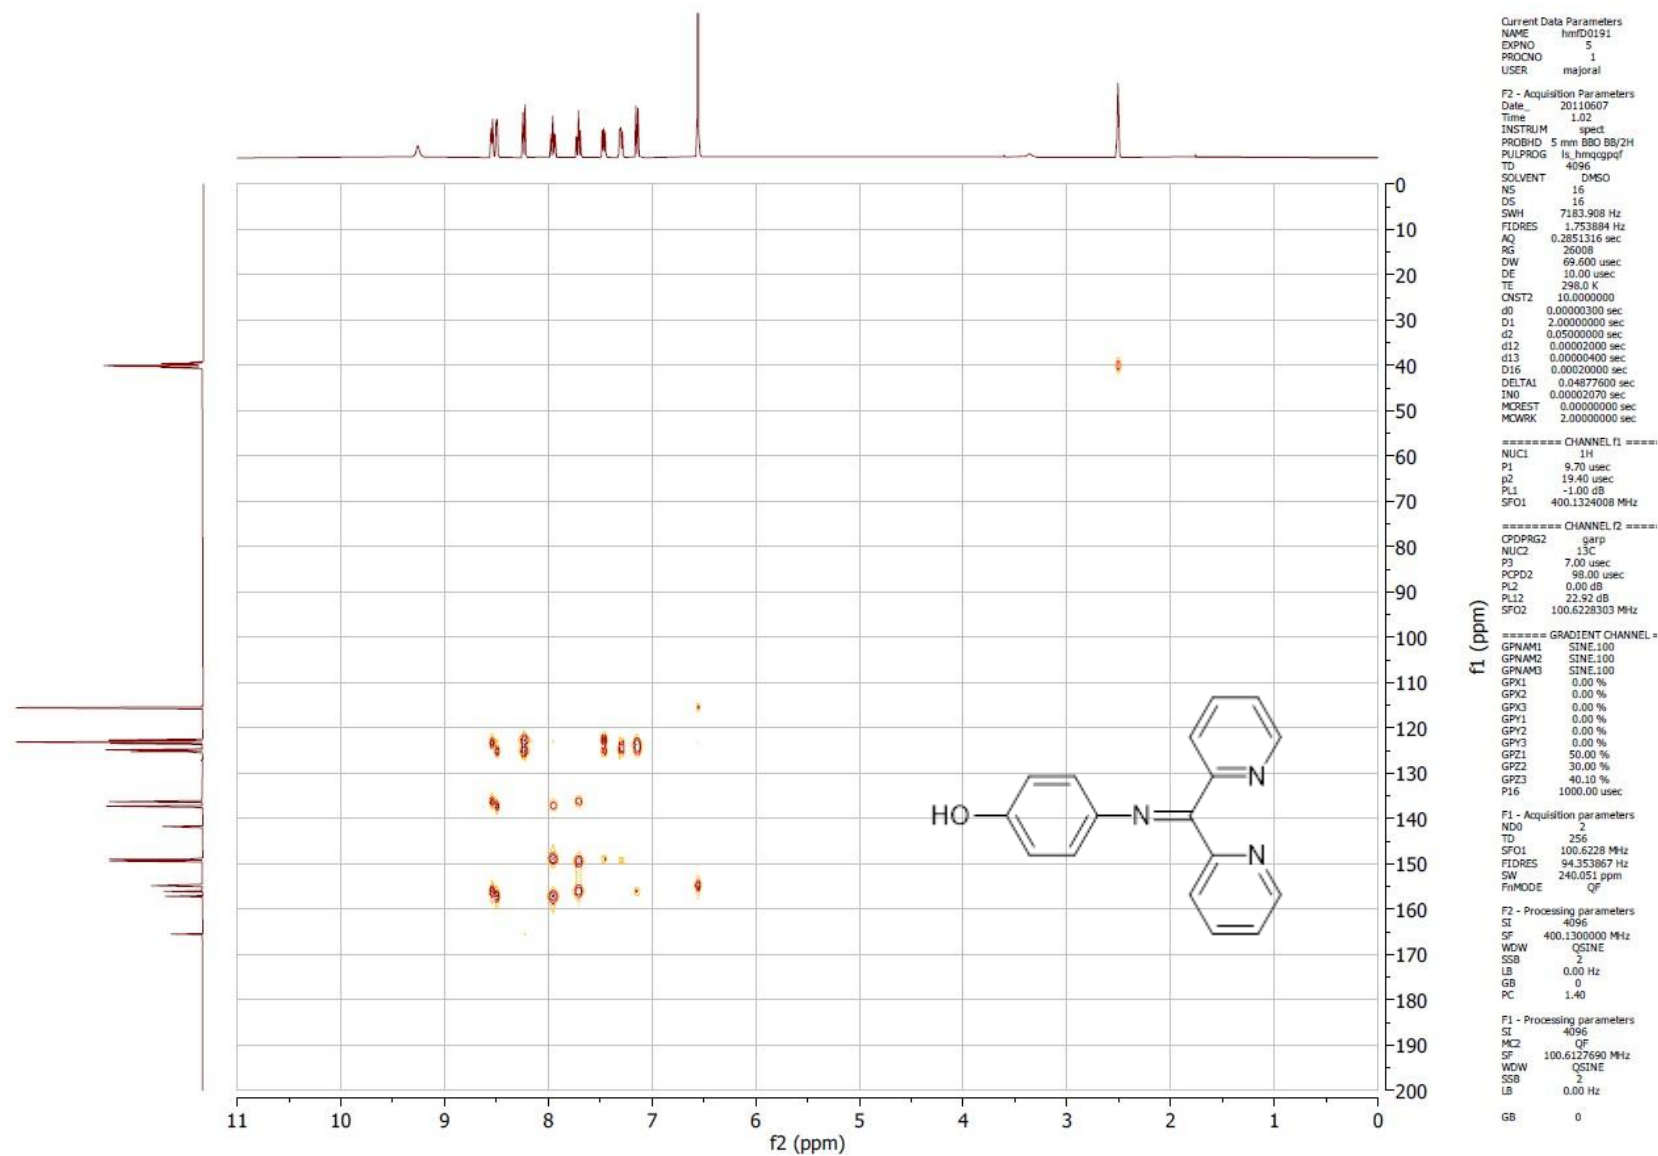

# <sup>1</sup>H NMR of Compound 5

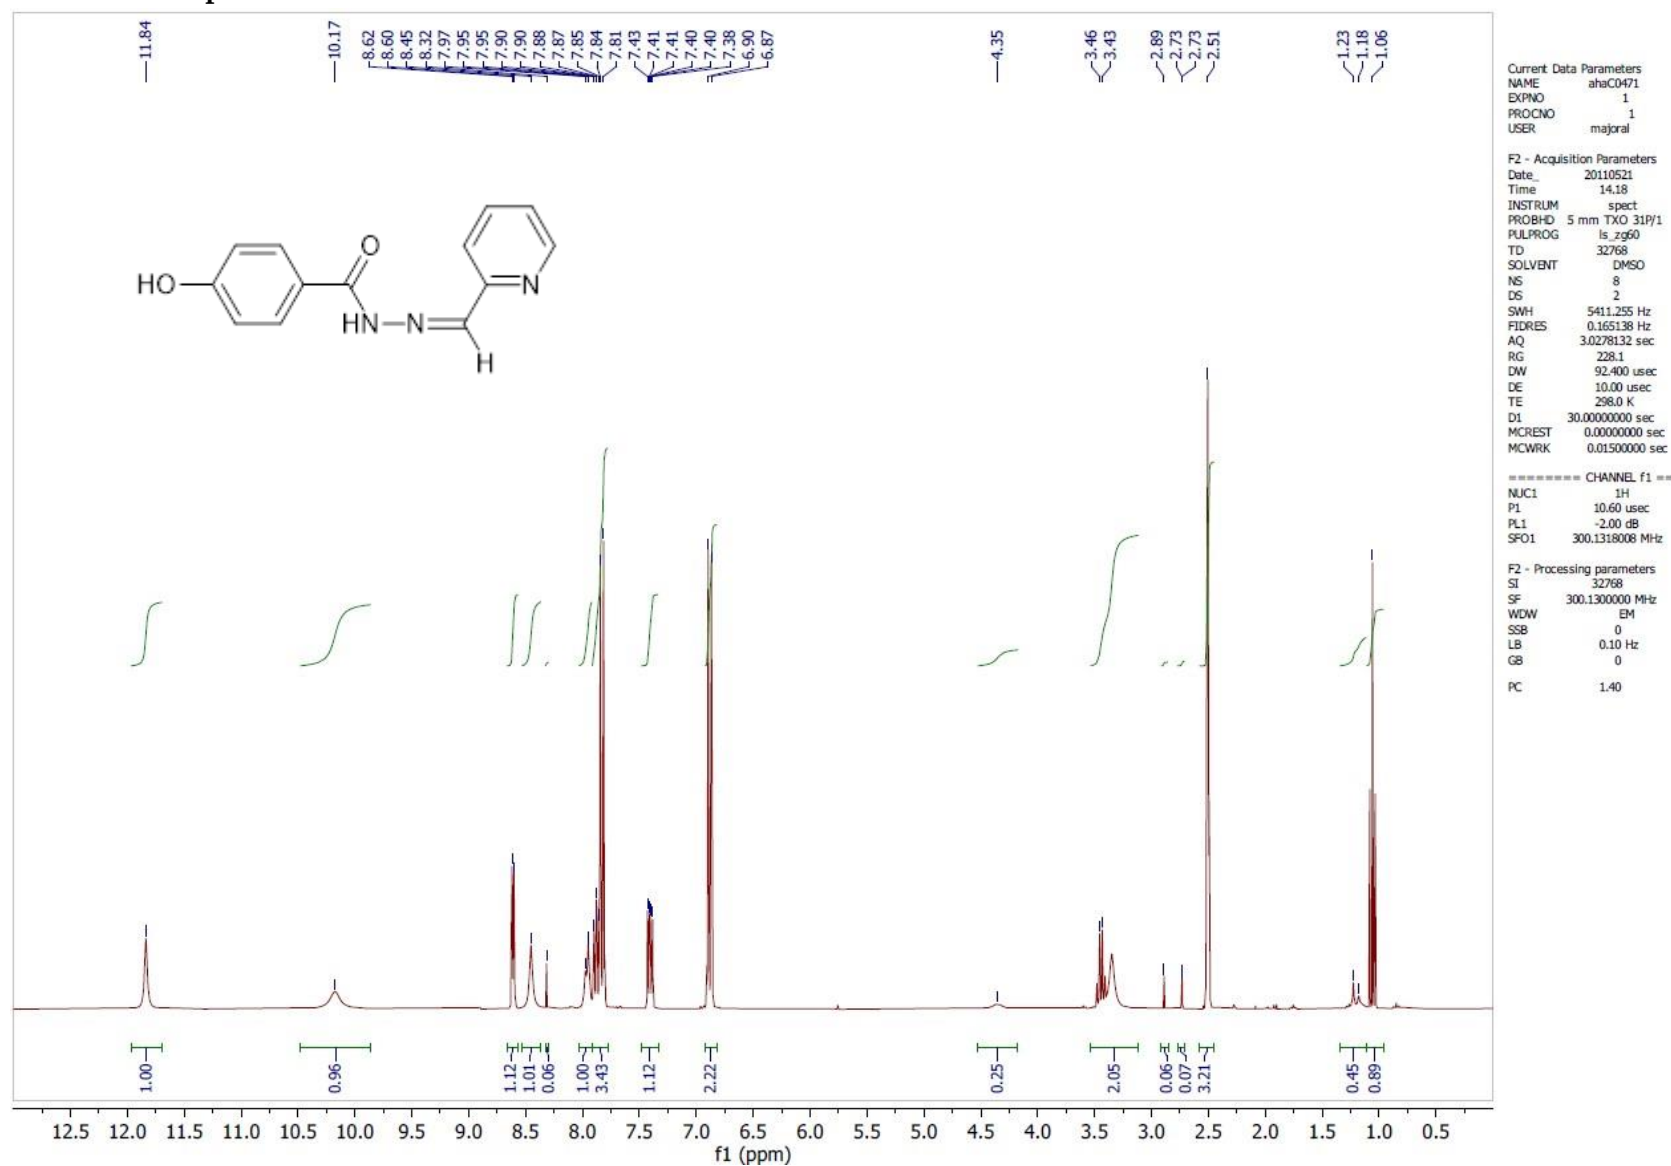



# <sup>1</sup>H COSY NMR of Compound 5

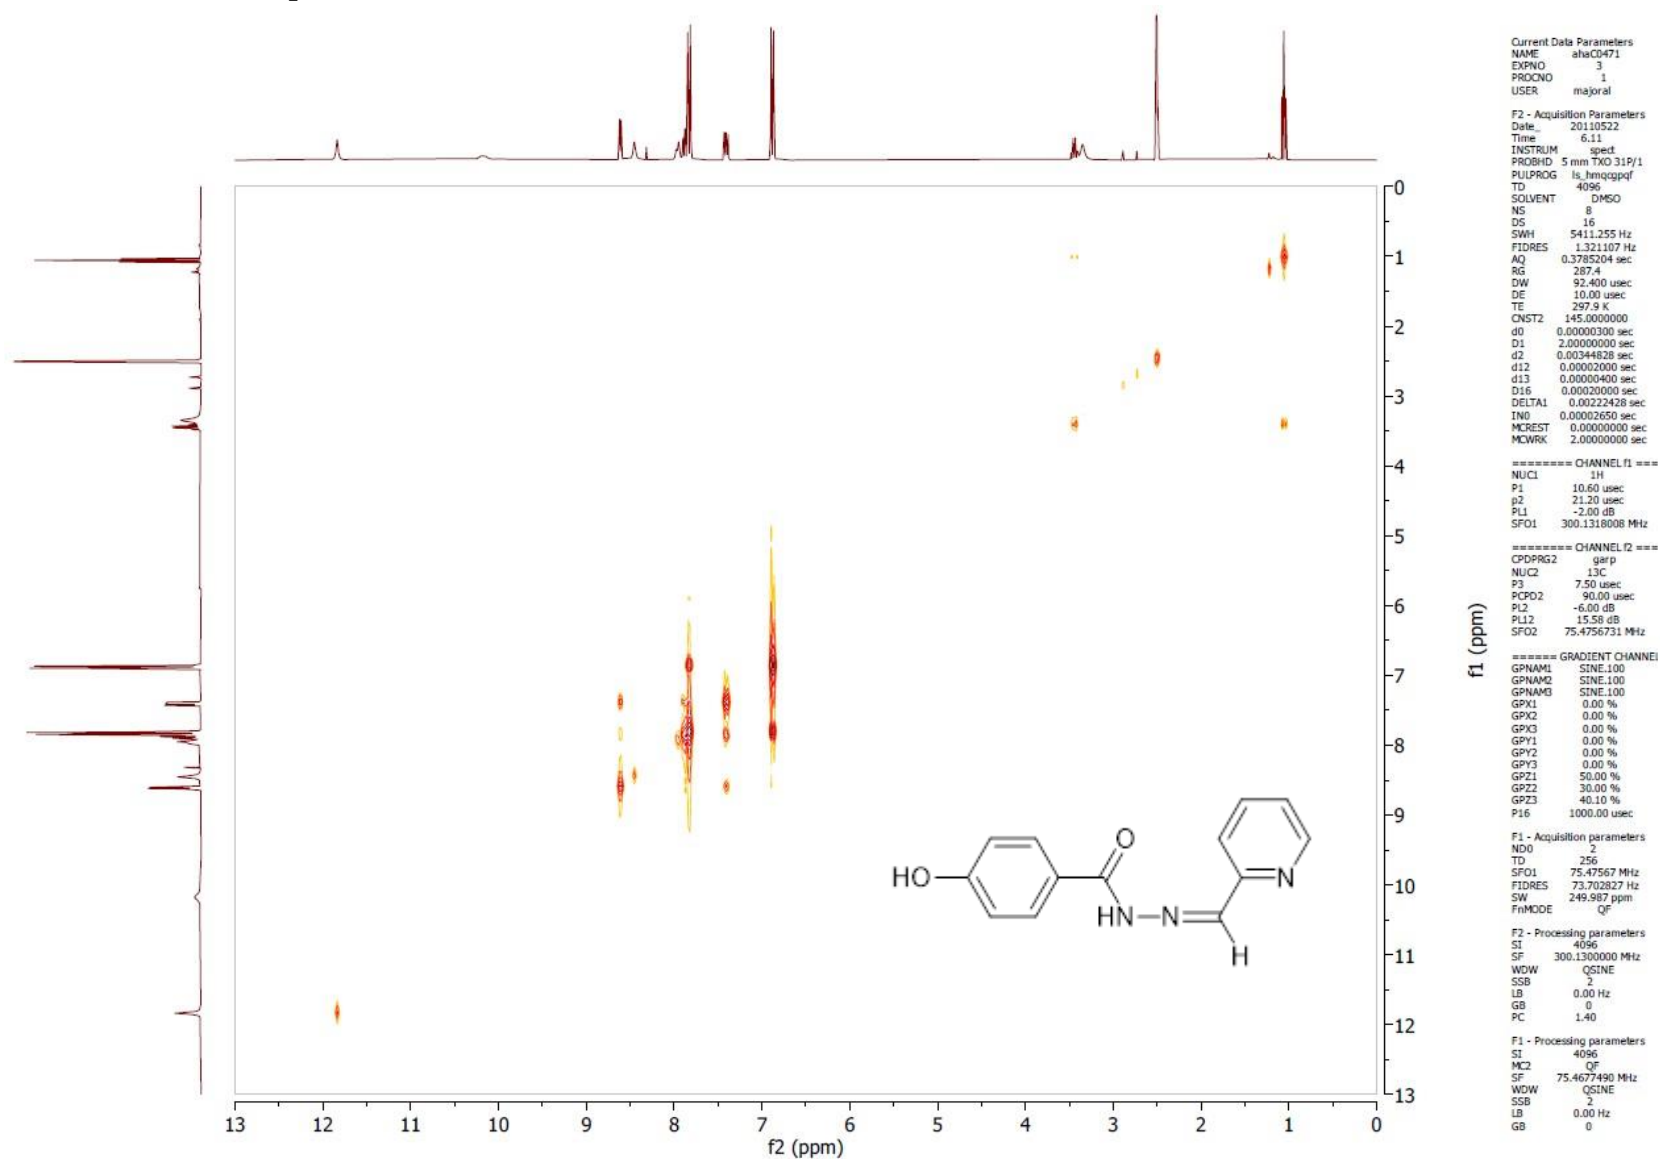

# <sup>13</sup>C{<sup>1</sup>H} NMR of Compound 5

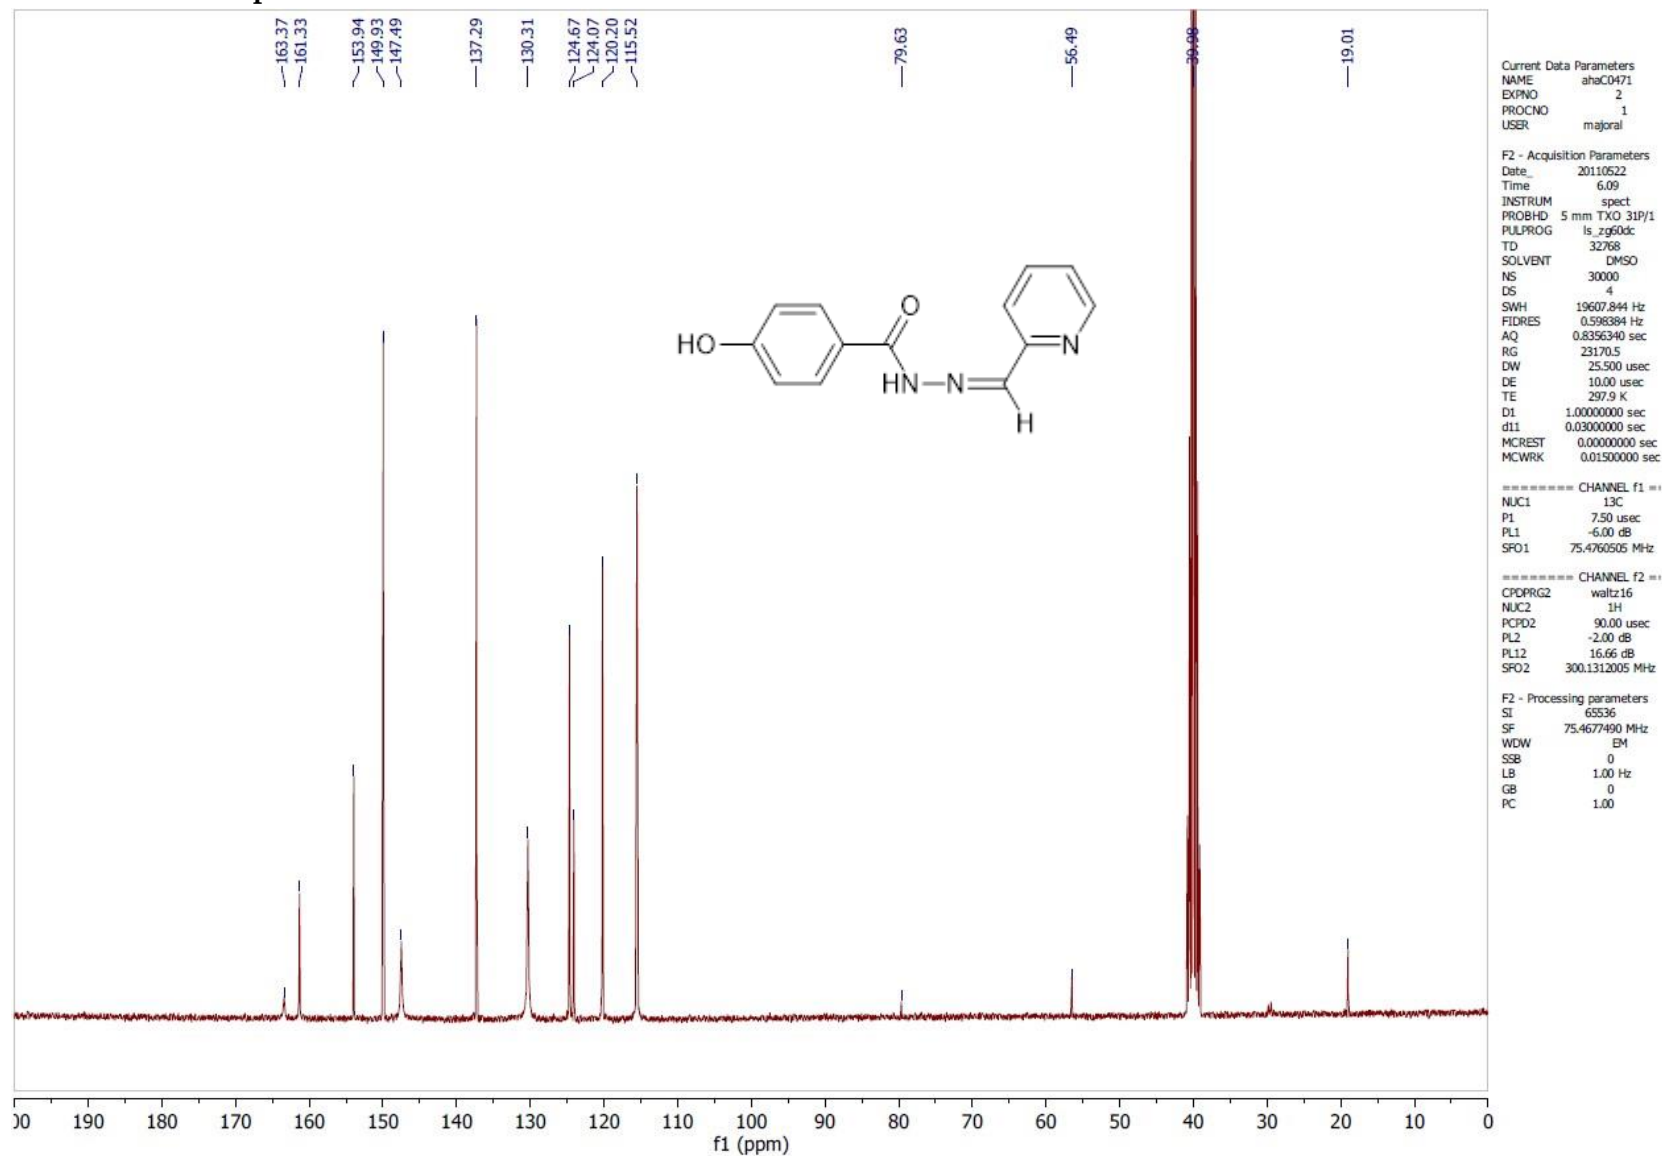

# <sup>13</sup>C HMBC NMR of Compound 5

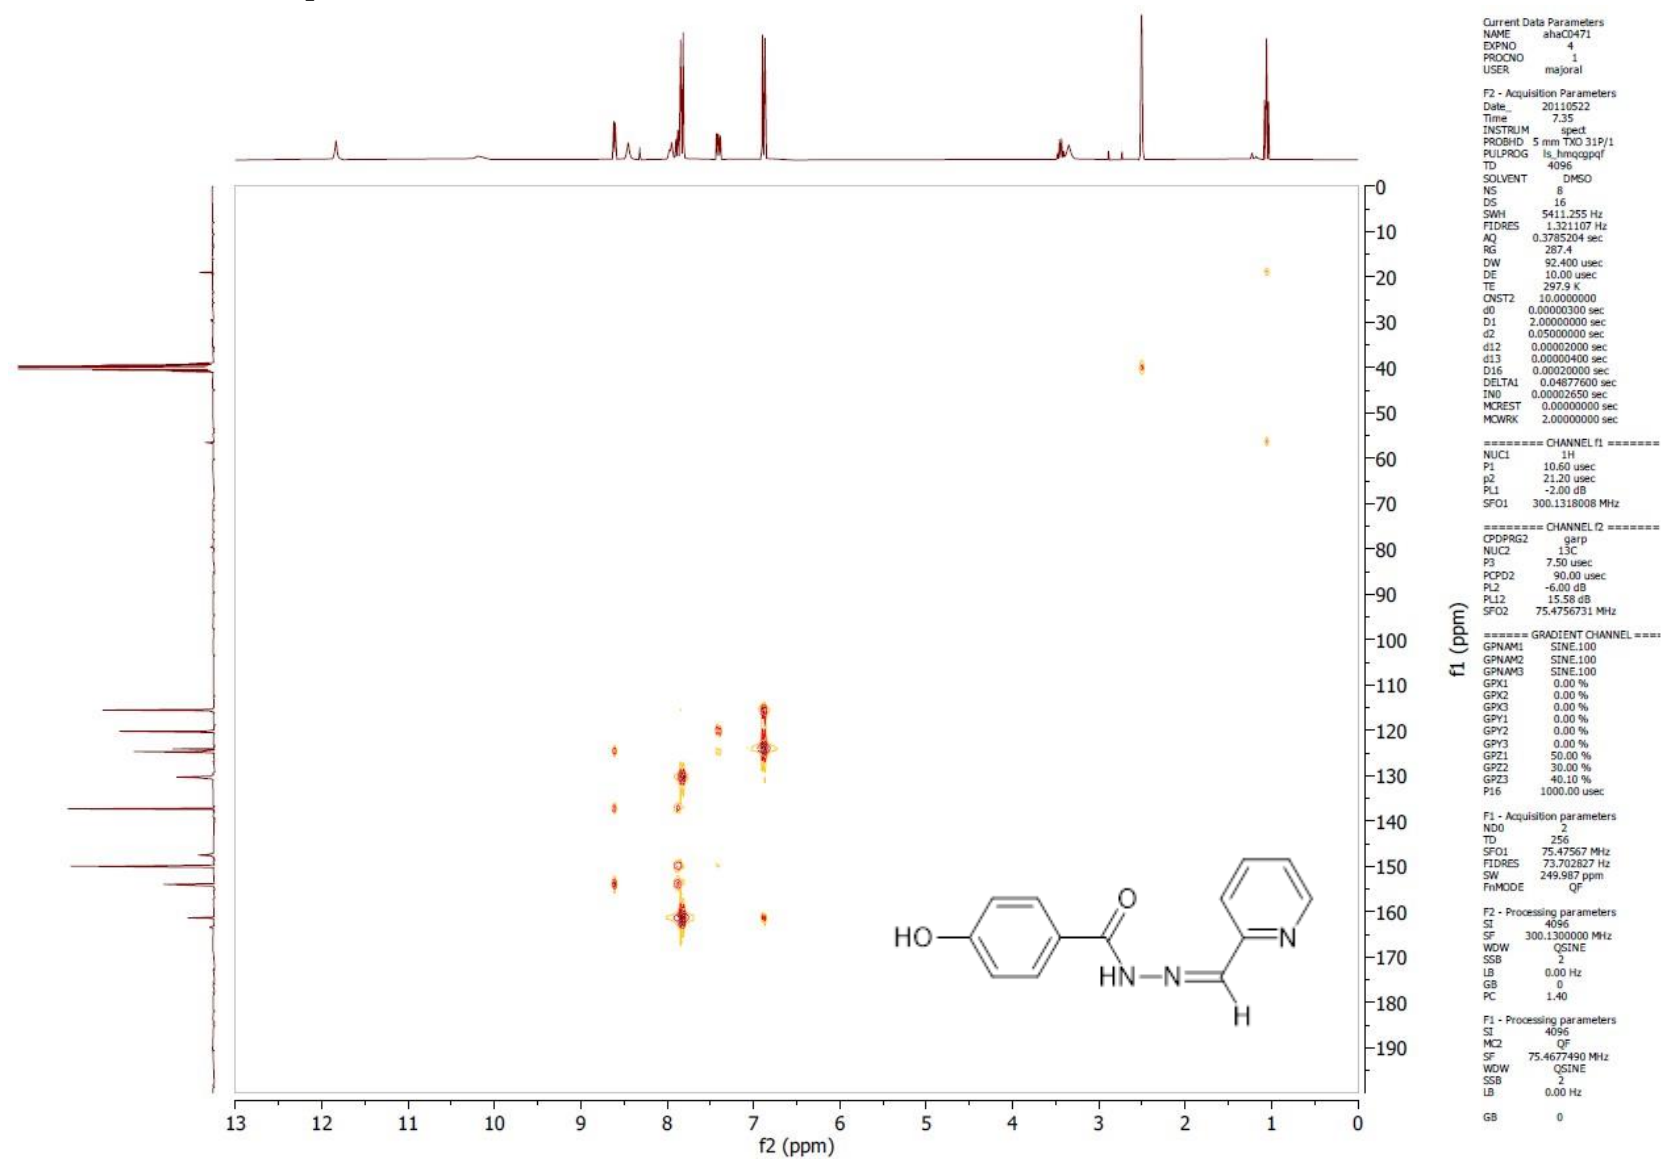

# <sup>13</sup>C HMQC NMR of Compound 5

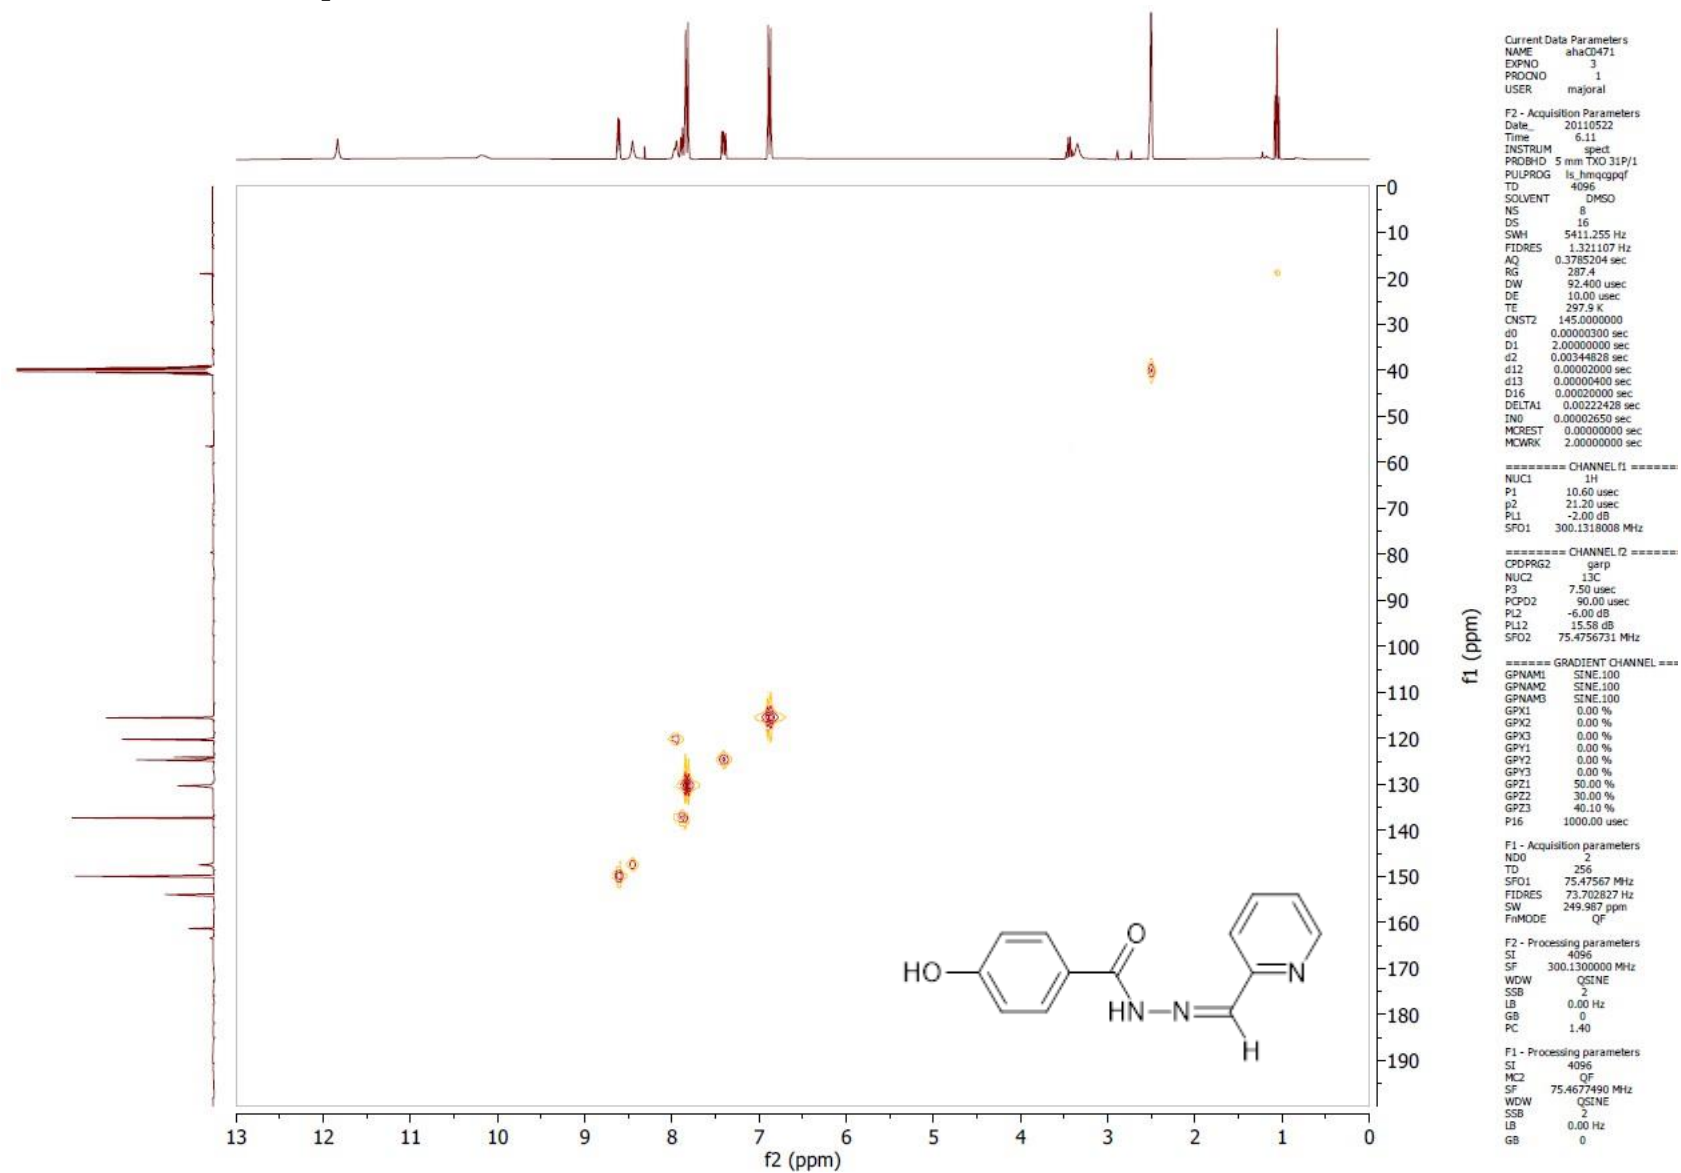

# <sup>1</sup>H NMR of Compound 6

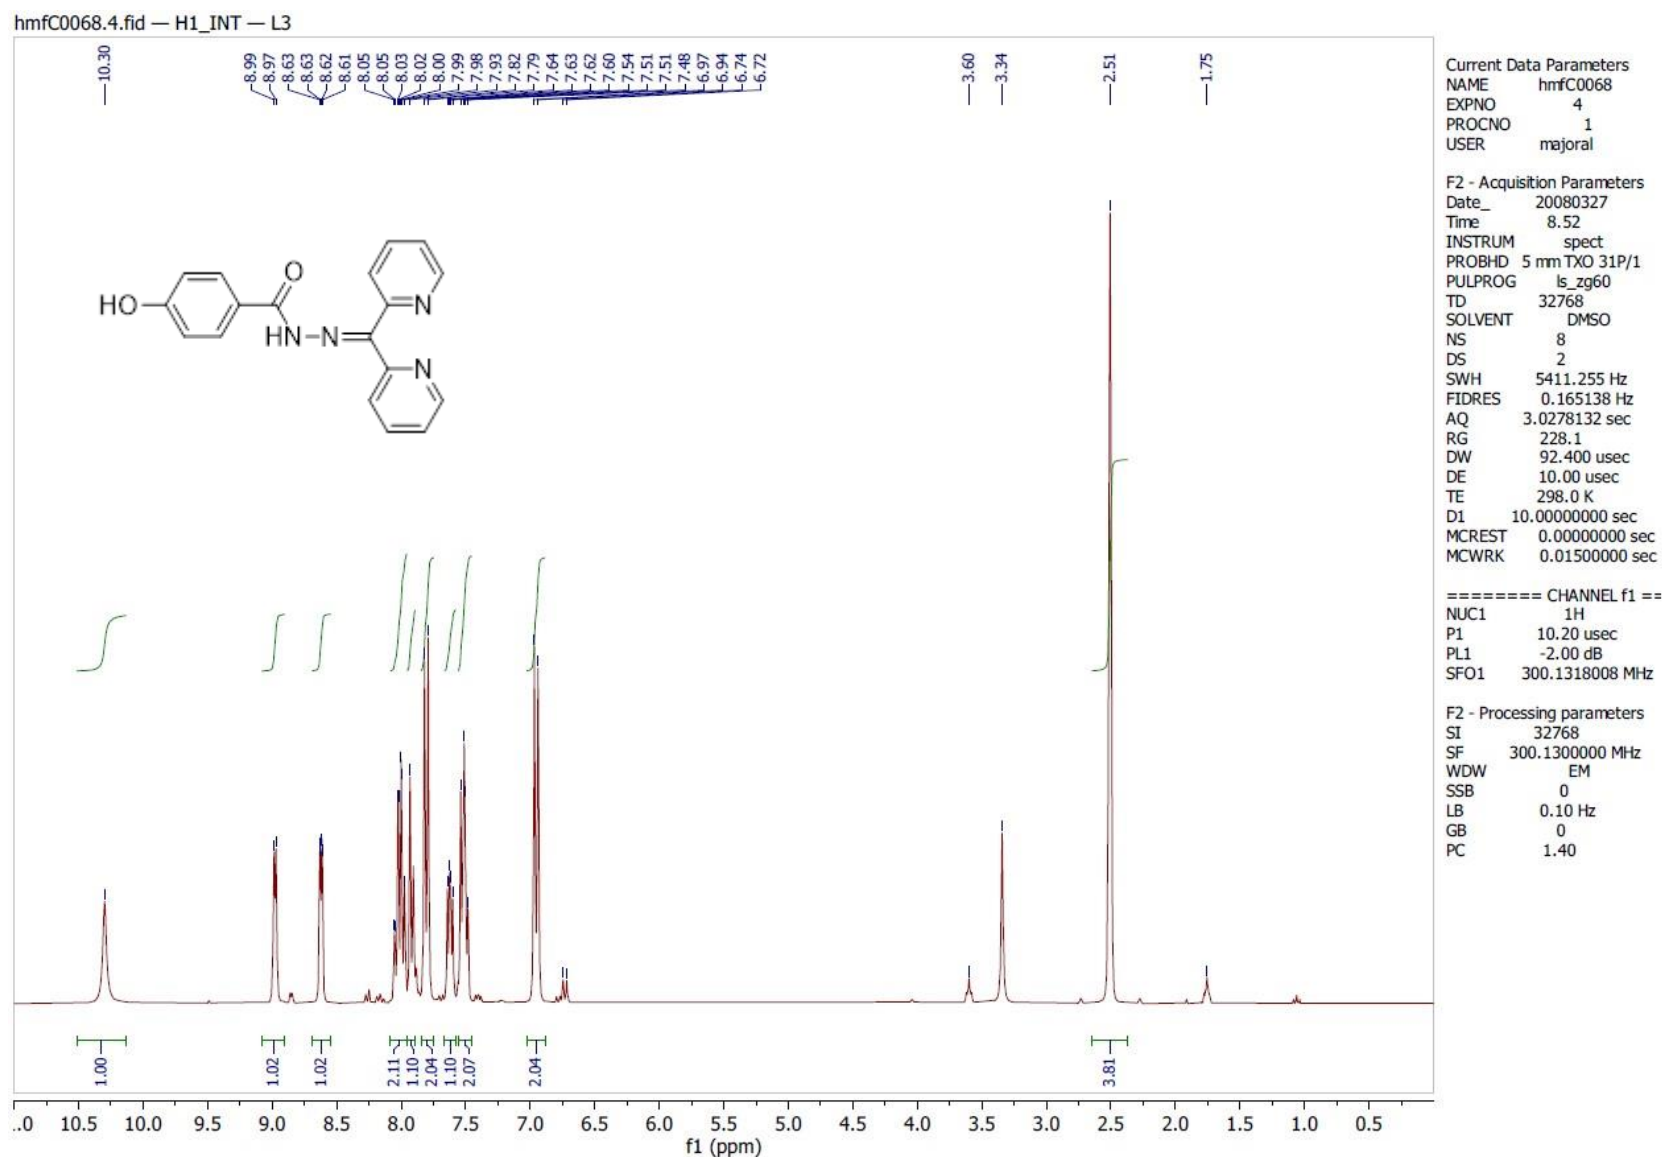

# <sup>13</sup>C{<sup>1</sup>H} NMR of Compound 6

hmfC0069.3.fid — C13\_DECOUPLE\_H1 — L#

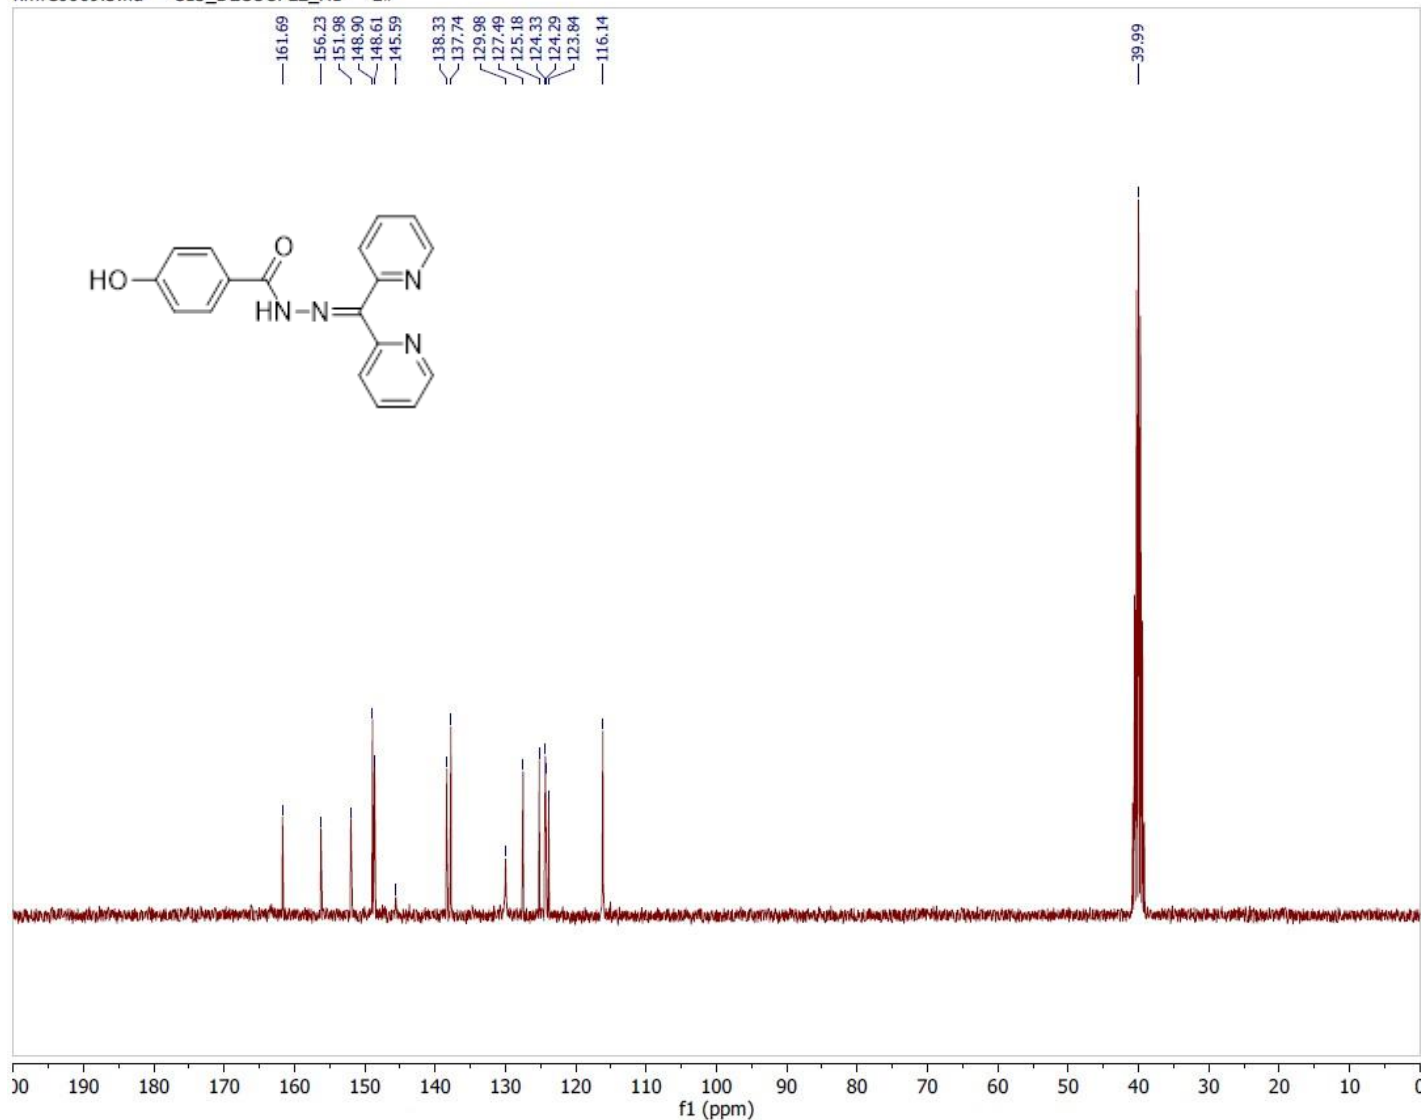

Current Data Parameters  
NAME hmfC0069  
EXPNO 3  
PROCNO 1  
USER majoral

F2 - Acquisition Parameters  
Date\_ 20080327  
Time 12.50  
INSTRUM spect  
PROBHD 5 mm TXO 31P/1  
PULPROG ls\_zg60dc  
TD 65536  
SOLVENT DMSO  
NS 975  
DS 4  
SWH 18115.941 Hz  
FIDRES 0.276427 Hz  
AQ 1.8088436 sec  
RG 5792.6  
DW 27.600 usec  
DE 10.00 usec  
TE 297.9 K  
D1 1.00000000 sec  
d11 0.03000000 sec  
MCREST 0.00000000 sec  
MCWRK 0.01500000 sec

===== CHANNEL f1 ==  
NUC1 13C  
P1 7.20 usec  
PL1 -6.00 dB  
SFO1 75.4752958 MHz

===== CHANNEL f2 ==  
CPDPRG2 waltz16  
NUC2 1H  
PCPD2 89.00 usec  
PL2 -2.00 dB  
PL12 17.00 dB  
SFO2 300.1312005 MHz

F2 - Processing parameters  
SI 65536  
SF 75.4677490 MHz  
WDW EM  
SSB 0  
LB 1.00 Hz  
GB 0  
PC 1.40

<sup>13</sup>C HMQC of Compound 6

C13\_HMQC\_GP\_QF

L#

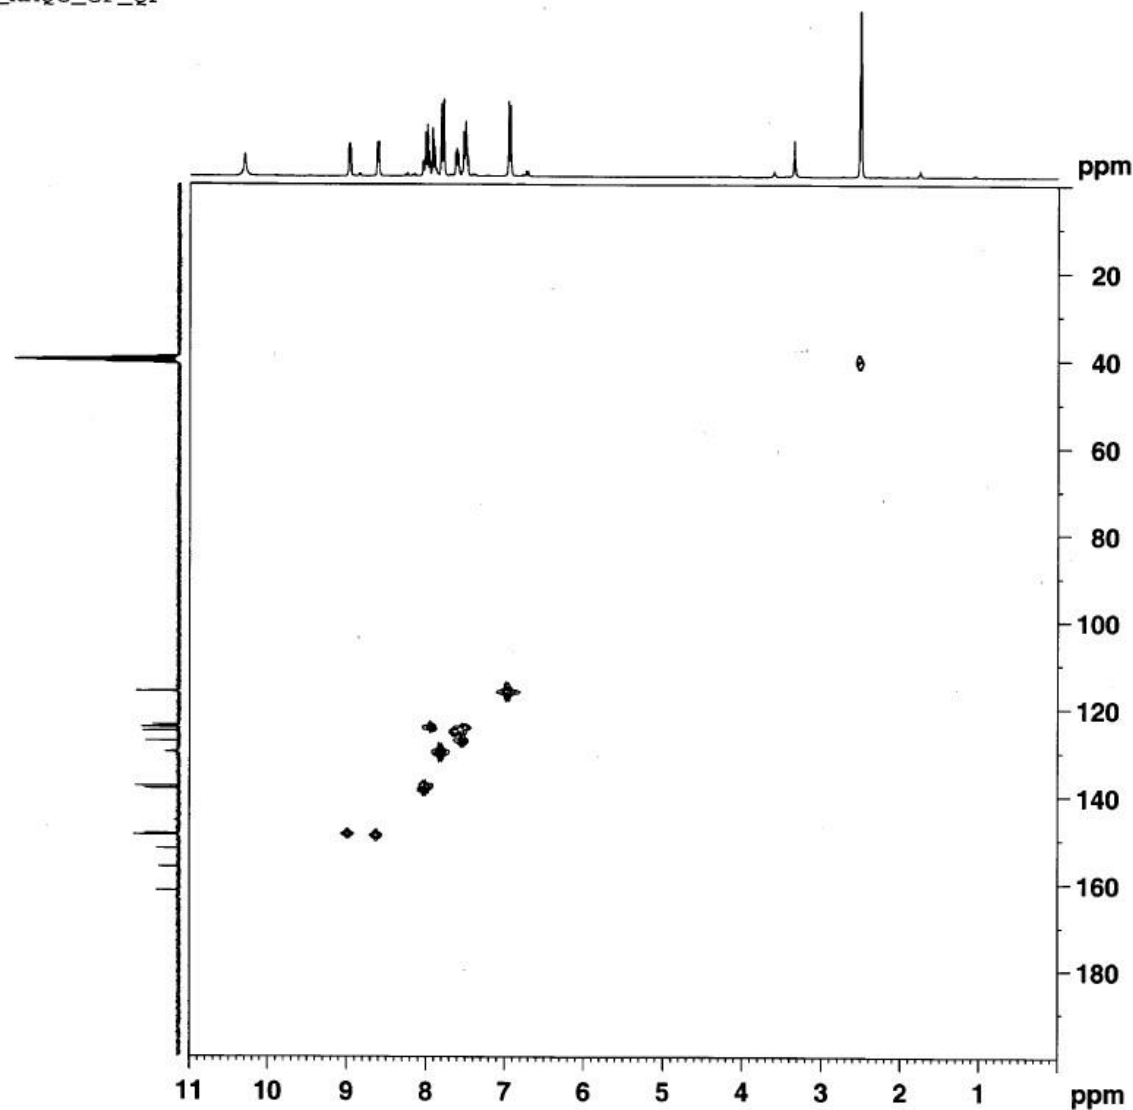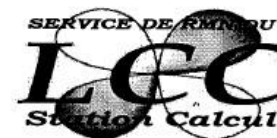

Current Data Parameters  
NAME JueCO069  
EXPNO 4  
PROCNO 1  
USDR majoral

F2 - Acquisition Parameters  
Date\_ 20080327  
Time 13.41  
INSTRUM spect  
PROBHD 5 mm TNO 319/1  
PULPROG ls\_hmqcpgqf  
TD 4096  
SOLVENT DMSO  
NS 8  
DS 8  
SWH 5411.255 Hz  
FIDRES 1.321107 Hz  
AQ 0.3785204 sec  
RG 256  
DM 92.400 usec  
DE 10.00 usec  
TE 297.3 K  
CNS2 145.000000  
RG 0.00000360 usec  
D1 1.50000000 usec  
S2 0.00344828 usec  
S12 0.00000000 usec  
S13 0.00000400 usec  
S16 0.00020000 usec  
DELTA1 0.00224248 usec  
IN0 0.00002760 usec  
MICROST 0.00000000 usec  
MCHRSK 1.50000000 usec

===== CHANNEL f1 =====  
NUC1 1H  
P1 10.20 usec  
P2 20.40 usec  
PL1 -2.00 dB  
SFO1 300.1318008 MHz

===== CHANNEL f2 =====  
CPDPRG2 waltz  
NUC2 13C  
P3 6.50 usec  
PCPD2 84.00 usec  
PL2 -6.00 dB  
PL12 16.00 dB  
SFO2 75.4752558 MHz

===== GRADIENT CHANNEL =====  
GPMAG1 SINE.100  
GPMAG2 SINE.100  
GPMAG3 SINE.100  
GFX1 0.00 %  
GFX2 0.00 %  
GFX3 0.00 %  
GFX4 0.00 %  
GFX5 0.00 %  
GFX6 0.00 %  
GFX7 0.00 %  
GFX8 50.00 %  
GFX9 30.00 %  
GFX10 40.10 %  
PL6 1000.00 usec

F1 - Acquisition parameters  
NO 2  
TD 256  
SFO1 75.4751 MHz  
FIDRES 70.765395 Hz  
SW 240.025 ppm  
F0MCOE QF

F2 - Processing parameters  
SI 4096  
SF 300.1300000 MHz  
WDW QF  
SSB 2  
LB 0.00 Hz  
GB 0  
PC 1.40

F1 - Processing parameters  
SI 4096  
NUC1 QF  
SF 75.4677490 MHz  
WDW QF  
SSB 2  
LB 0.00 Hz  
GB 0

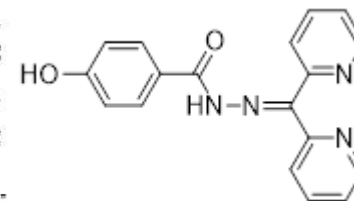

$^{31}\text{P} \{^1\text{H}\}$

NMR during the course of the synthesis of 1-G<sub>0</sub>



$^{31}\text{P}$  {1

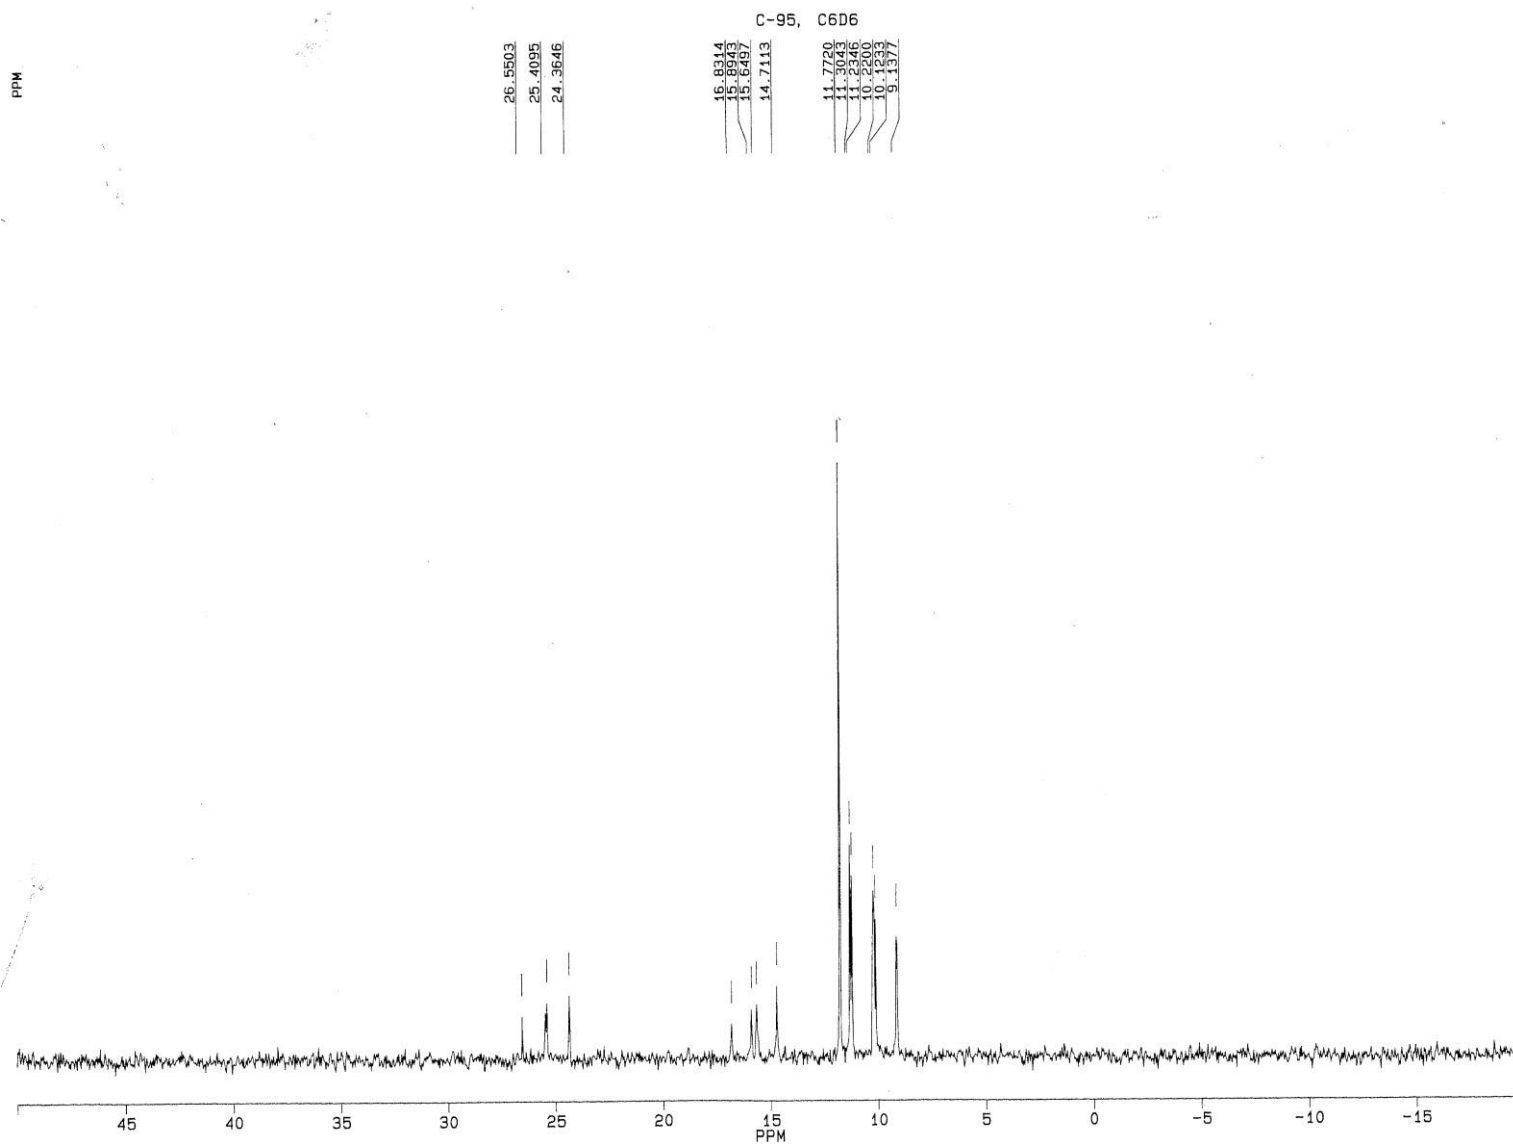

~~BLANK~~

SP290506.002  
DATE 29-5-5  
TIME 18:26

SF 81.015  
SY 81.010000  
O1 5000.000  
SI 16384  
TD 16384  
SW 23809.524  
HZ/PT 2.906

PW 4.0  
RD 1.000  
AQ .344  
RG 800  
NS 150  
TE 298

FW 29800  
O2 3300.000  
DP 24H 8B

LB 1.500  
GB 0.0  
CX 35.00  
CY 0.0  
F1 50.015P  
F2 -19.942P  
HZ/CM 161.930  
PPM/CM 1.999  
SR 4770.00

$^{31}\text{P}\{^1\text{H}\}$  NMR of 1-G<sub>0</sub>

$^{31}\text{P}$  {1

C-95, CDCL<sub>3</sub>

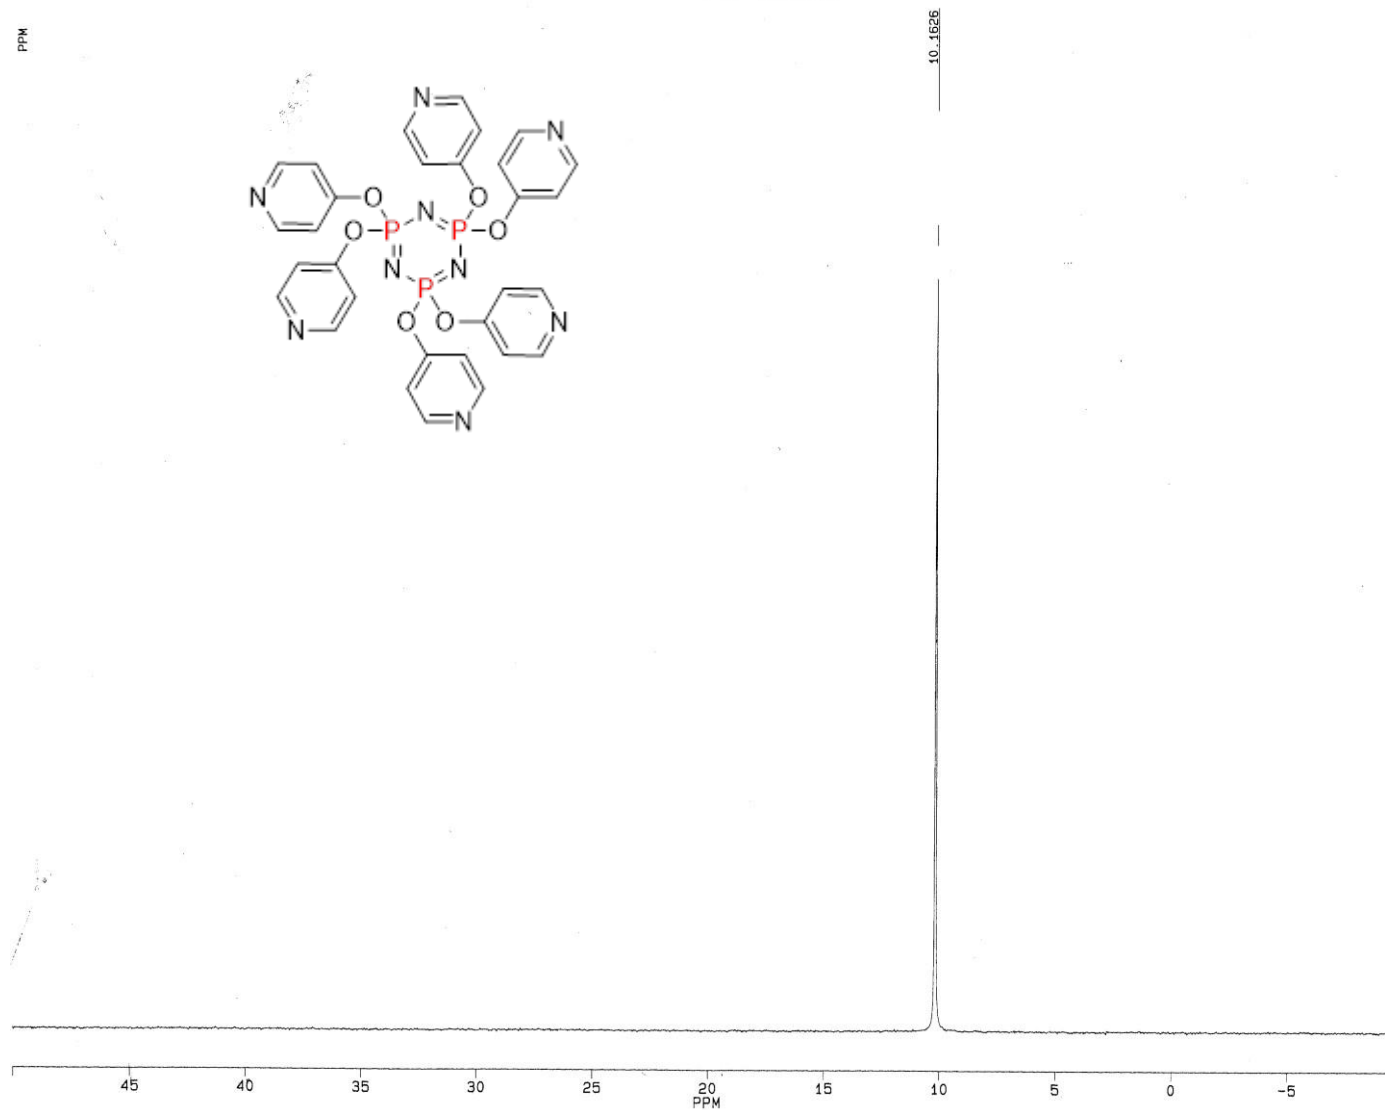

~~BRUKER~~

SP310506.004  
DATE 31-5-5  
TIME 10:17

SF 81.015  
SY 81.0100000  
Q1 5000.000  
SI 16384  
TD 16384  
SW 23809.524  
HZ/PT 2.906

PW 4.0  
RD 1.000  
AQ .344  
RG 200  
NS 147  
TE 298

FW 29800  
Q2 3500.000  
DP 24H BB

LB 1.500  
GB 0.0  
CX 35.00  
CY 0.0  
F1 50.014P  
F2 -9.970P  
HZ/CM 138.845  
PPM/CM 1.714  
SR 4773.00

$^{31}\text{P} \{^1\text{H}\}$

NMR of dendrimer 1-G<sub>1</sub>

$^{31}\text{P}\{1$

C97 CDCL3

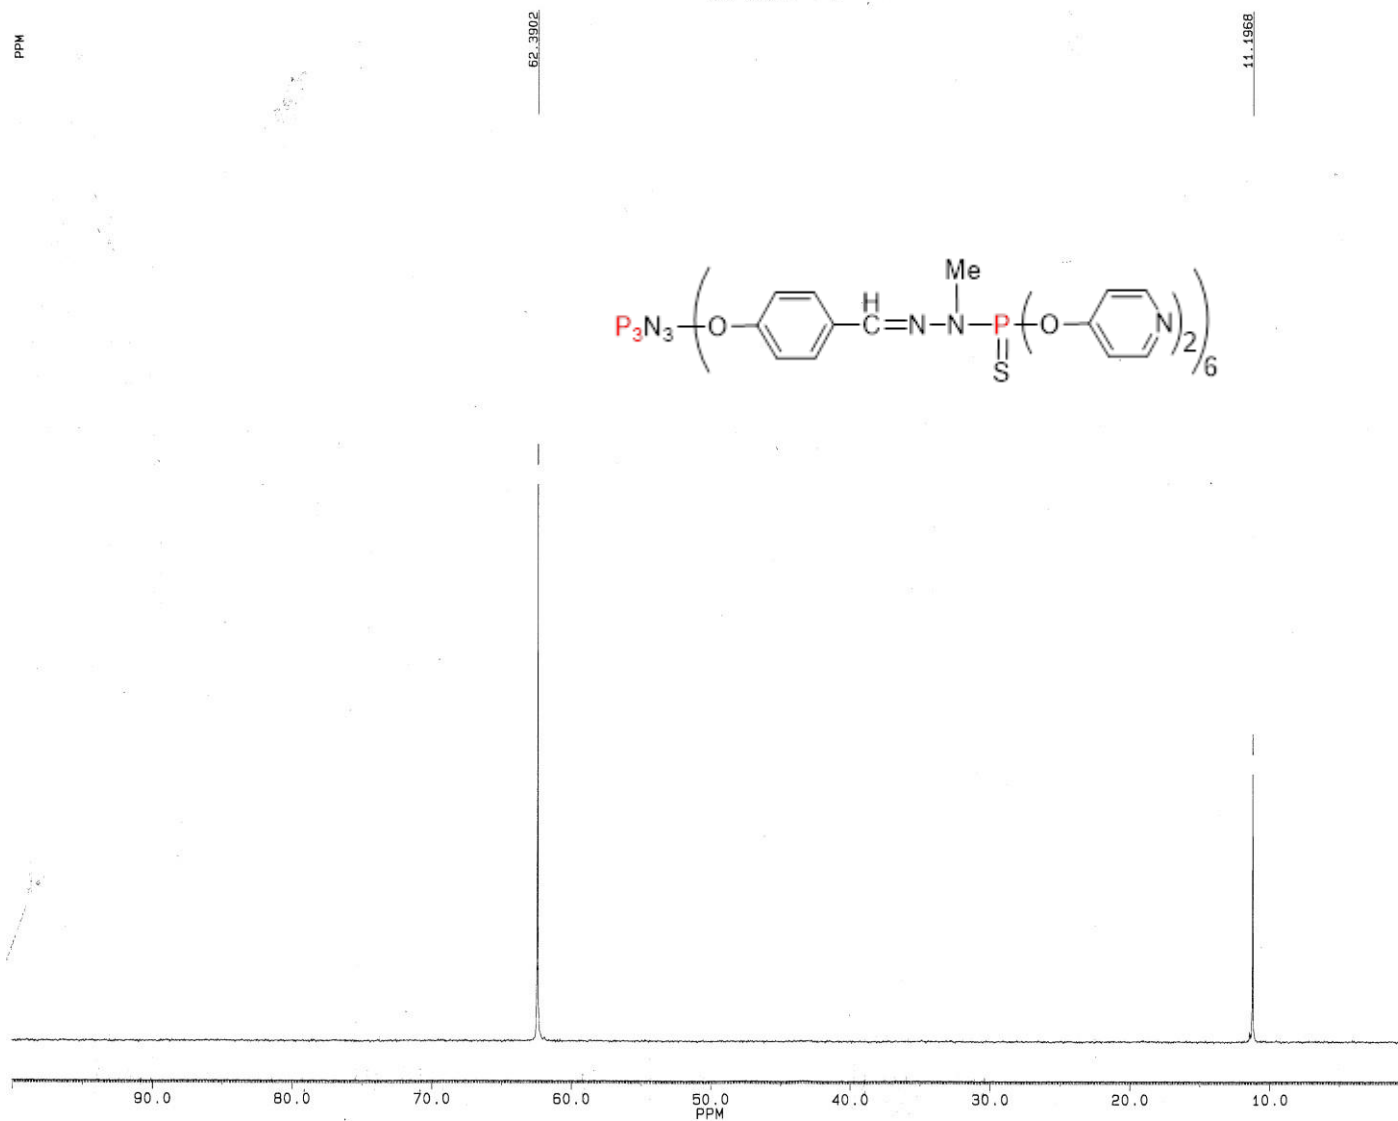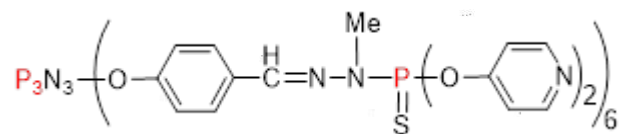

~~BOURER~~

SP010606.002  
DATE 1-6-6  
TIME 10:59

SF 81.015  
SY 81.0100000  
O1 5000.000  
SI 16384  
TD 16384  
SW 23809.524  
HZ/PT 2.906

PW 4.0  
RD 1.000  
AQ .344  
RG 800  
NS 137  
TE 298

FW 29800  
Q2 3300.000  
DP 24H BB

LB 1.500  
GB 0.0  
CX 35.00  
CY 0.0  
F1 100.024P  
F2 .040P  
HZ/CM 231.435  
PPM/CM 2.857  
SR 4773.00

**$^1\text{H}$  NMR of dendrimer 1-G<sub>1</sub>**

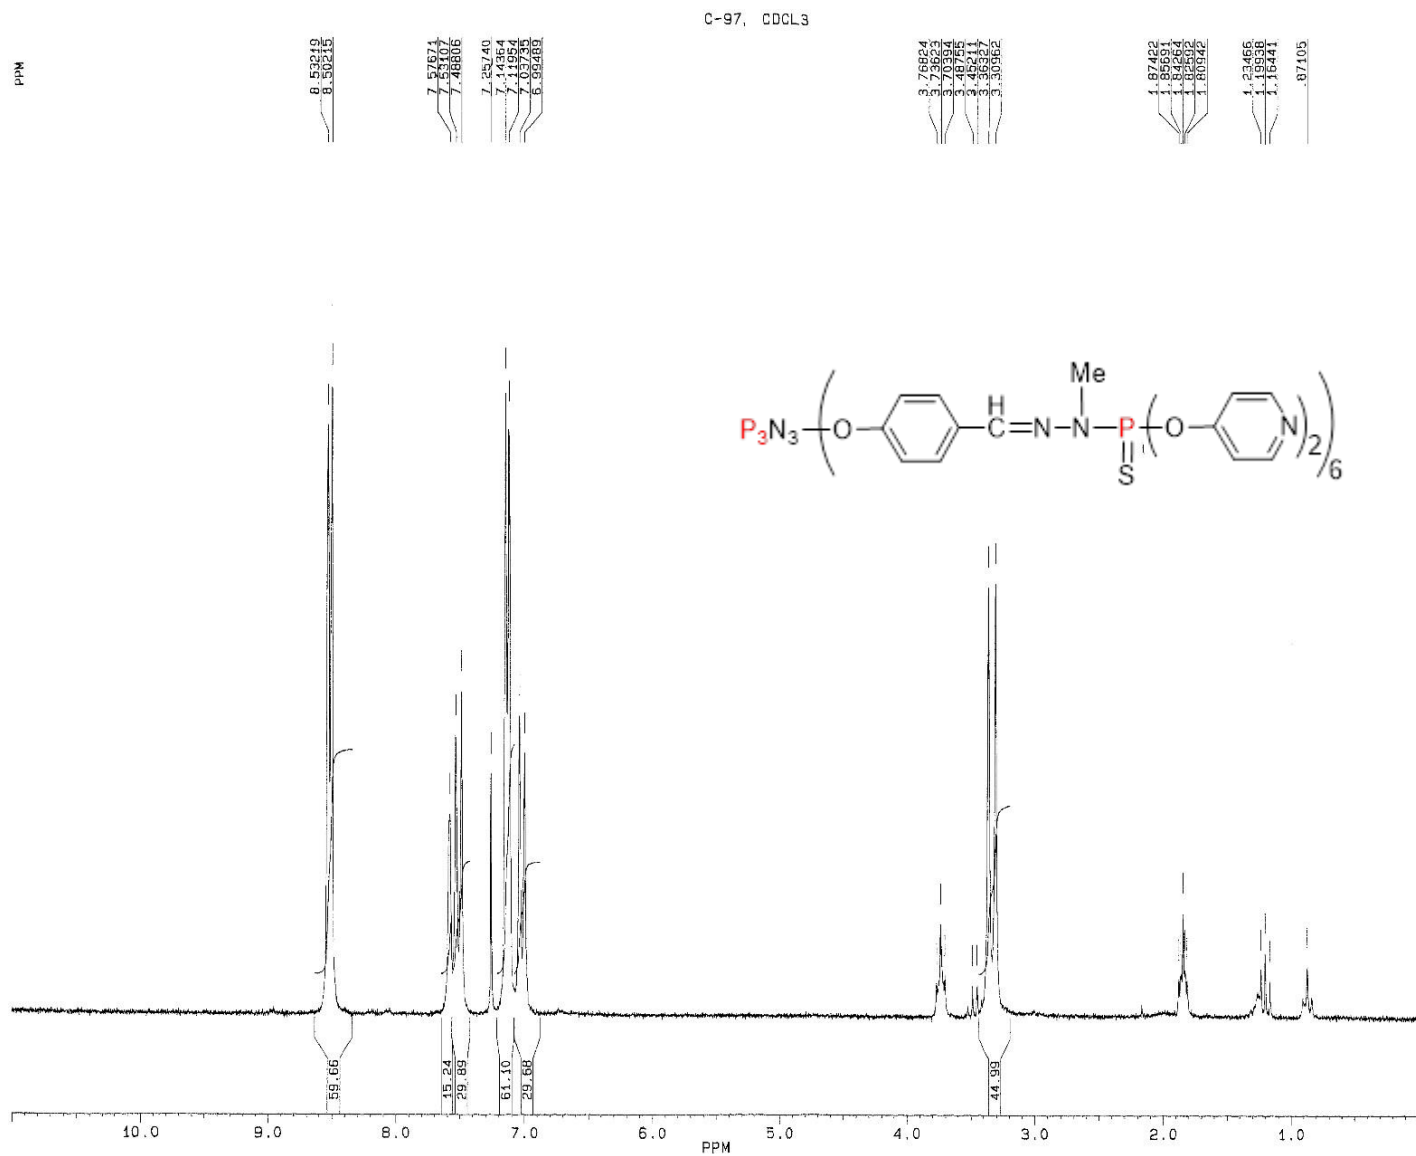

~~BLANK~~

SP010605.003  
DATE 1-6-6  
TIME 11:01

SF 200.132  
SY 80.1300000  
O1 3300.000  
SI 16384  
TD 16384  
SW 2808.989  
HZ/PT .343

PW 5.5  
RD 5.000  
AQ 2.916  
RG 8  
NS 8  
TE 294

FW 3600  
DS -10000.000  
DP 63L PQ

LB 0.0  
GB 0.0  
CX 35.00  
CY 0.0  
F1 11.001P  
F2 .001P  
HZ/CM 62.897  
PPM/CM .314  
SR 2341.00

$^{13}\text{C}\{^1\text{H}\}$  NMR of dendrimer 1-G<sub>1</sub>

C-97, CDCl<sub>3</sub>

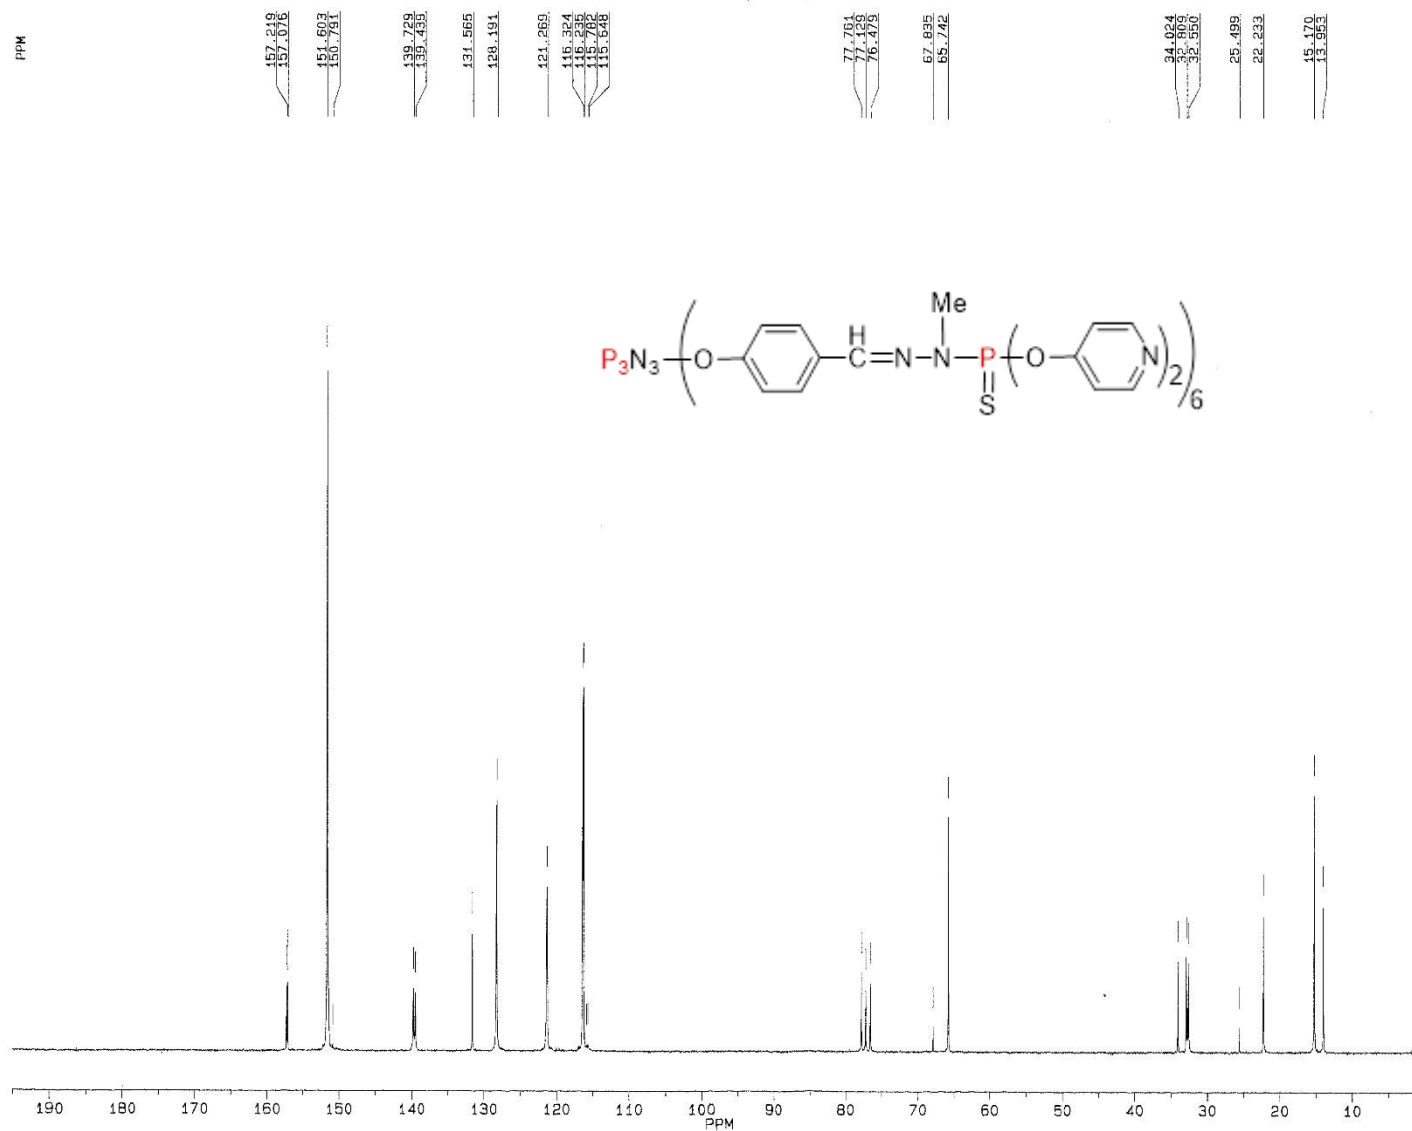

~~BOOKER~~

SPC97.010  
 AU PROS:  
 SAVEDC  
 DATE 6-6-6  
 TIME 8:38  
  
 SF 50.323  
 SY 50.3200000  
 O1 8500.000  
 SI 16384  
 TD 16384  
 SW 15151.515  
 HZ/PT 1.850  
  
 PW 4.0  
 RD 0.0  
 AQ .541  
 RG 800  
 NS 28800  
 TE 297  
  
 FW 19000  
 O2 3300.000  
 DP 24H BB  
  
 LB 1.000  
 GB 0.0  
 CX 35.00  
 CY 0.0  
 F1 195.005P  
 F2 -.009P  
 HZ/CM 280.392  
 PPM/CM 5.572  
 SR 3318.00



**$^{31}\text{P}$  { $^1\text{H}$ } NMR of dendrimer 3-G<sub>1</sub>-Pd<sub>12</sub>**

P31\_DECOUPLE\_H1  
Gc1L1Pd

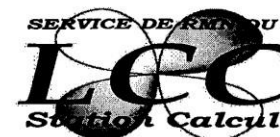

Current Data Parameters  
NAME hmfC0096  
EXPNO 3  
PROCNO 1  
USER majoral

F2 - Acquisition Parameters  
Date\_ 20080429  
Time 18.56  
INSTRUM spect  
PROBHD 5 mm TXO 31P/1  
PULPROG ls\_zg60dc  
TD 65536  
SOLVENT DMSO  
NS 400  
DS 4  
SWH 36496.352 Hz  
FIDRES 0.556890 Hz  
AQ 0.8978932 sec  
RG 41285.1  
DW 13.700 usec  
DE 10.00 usec  
TE 297.9 K  
D1 1.00000000 sec  
d11 0.03000000 sec  
MCREST 0.00000000 sec  
MCWRK 0.01500000 sec

===== CHANNEL f1 =====  
NUC1 31P  
P1 8.80 usec  
PL1 0.00 dB  
SFO1 121.4948510 MHz

===== CHANNEL f2 =====  
CPDPRG2 waltz16  
NUC2 1H  
PCPD2 89.00 usec  
PL2 -2.00 dB  
PL12 17.00 dB  
SFO2 300.1312005 MHz

F2 - Processing parameters  
SI 65536  
SF 121.4948510 MHz  
WDW EM  
SSB 0  
LB 1.00 Hz  
GB 0  
PC 1.40

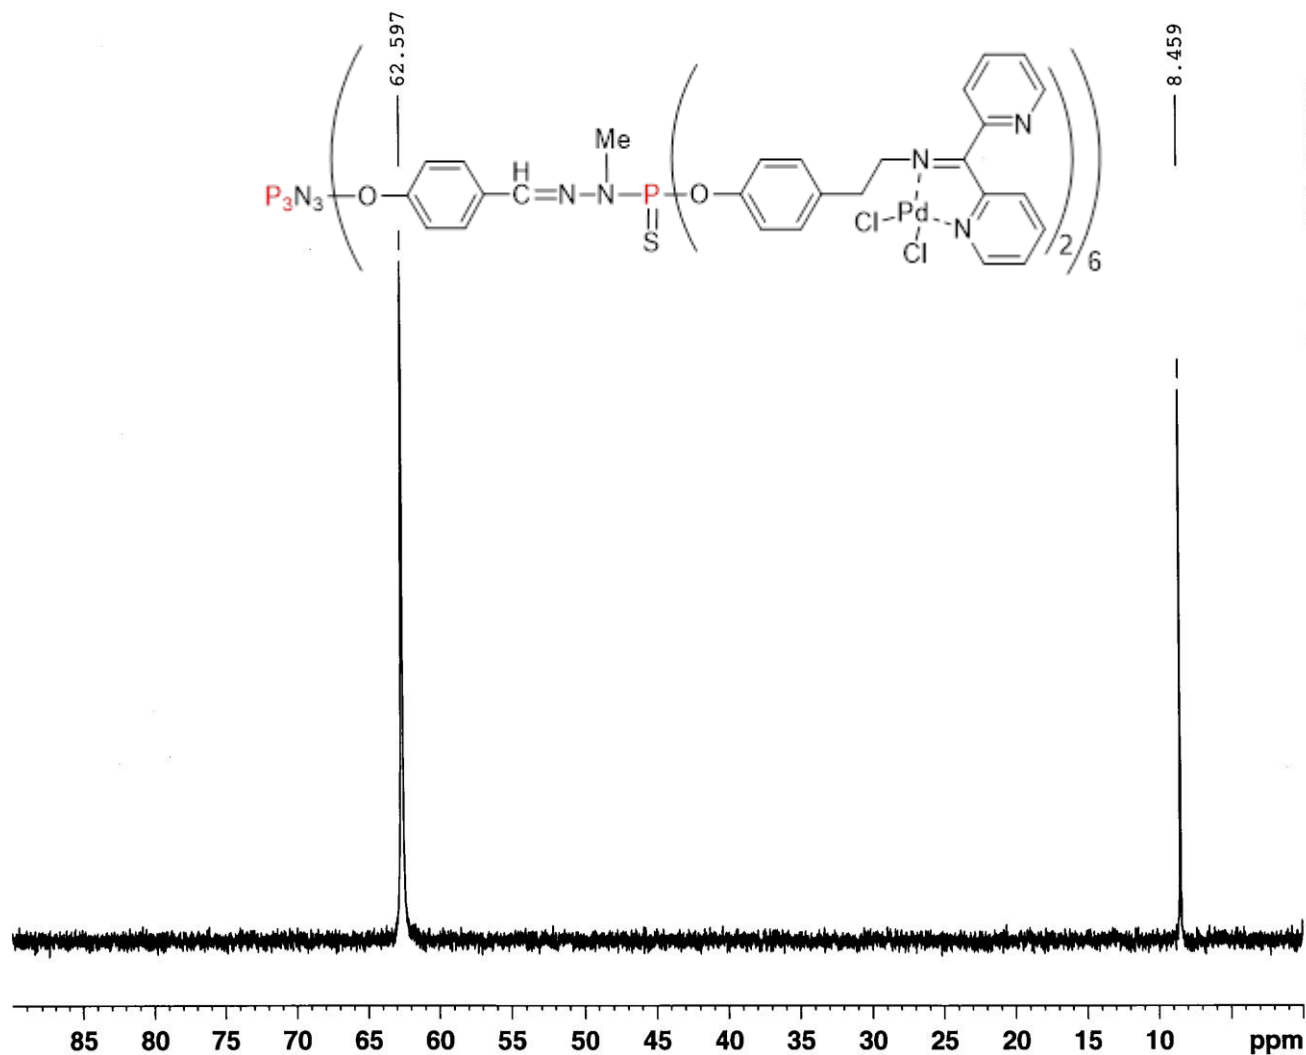

**$^1\text{H}$  NMR of dendrimer 3-G<sub>1</sub>-Pd<sub>12</sub>**

H1\_INT  
Gc1L1Pd

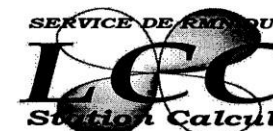

Current Data Parameters  
NAME hmfC0096  
EXPNO 2  
PROCNO 1  
USER majoral

F2 - Acquisition Parameters  
Date\_ 20080429  
Time 18.42  
INSTRUM spect  
PROBHD 5 mm TXO 31P/1  
PULPROG 1s\_zg60  
TD 32768  
SOLVENT DMSO  
NS 16  
DS 2  
SWH 5411.255 Hz  
FIDRES 0.165138 Hz  
AQ 3.0278132 sec  
RG 228.1  
DW 92.400 usec  
DE 10.00 usec  
TE 298.0 K  
D1 10.00000000 sec  
MCREST 0.00000000 sec  
MCWRK 0.01500000 sec

===== CHANNEL f1 =====  
NUC1 1H  
P1 10.20 usec  
PL1 -2.00 dB  
SFO1 300.1318008 MHz

F2 - Processing parameters  
SI 32768  
SF 300.1300000 MHz  
WDW EM  
SSB 0  
LB 0.10 Hz  
GB 0  
PC 1.40

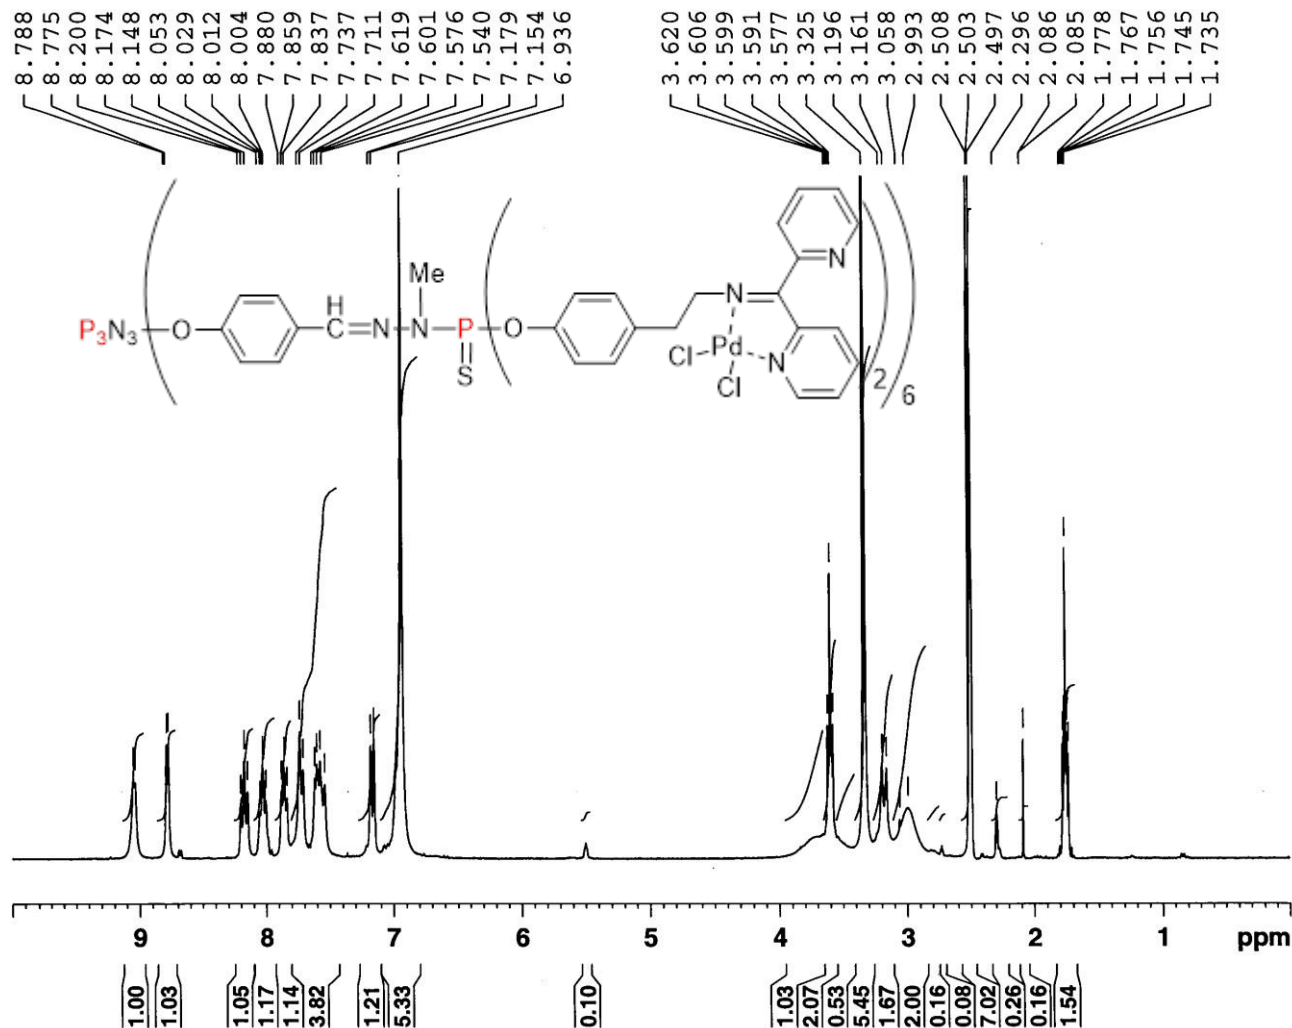

<sup>13</sup>

**C {<sup>1</sup>H} NMR of dendrimer 3-G<sub>1</sub>-Pd<sub>12</sub>**

C13\_DECOUPLE\_H1  
Gc1L1Pd

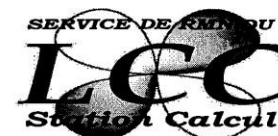

Current Data Parameters  
NAME hmfC0096  
EXPNO 4  
PROCNO 1  
USER majoral

F2 - Acquisition Parameters  
Date\_ 20080430  
Time 0.04  
INSTRUM spect  
PROBHD 5 mm TXO 31P/1  
PULPROG 1s\_zg60dc  
TD 65536  
SOLVENT DMSO  
NS 6400  
DS 4  
SWH 18115.941 Hz  
FIDRES 0.276427 Hz  
AQ 1.8088436 sec  
RG 26008  
DW 27.600 usec  
DE 10.00 usec  
TE 297.9 K  
D1 1.00000000 sec  
d11 0.03000000 sec  
MCREST 0.00000000 sec  
MCWRK 0.01500000 sec

===== CHANNEL f1 =====  
NUC1 13C  
P1 7.20 usec  
PL1 -6.00 dB  
SFO1 75.4752958 MHz

===== CHANNEL f2 =====  
CPDPRG2 waltz16  
NUC2 1H  
PCPD2 89.00 usec  
PL2 -2.00 dB  
PL12 17.00 dB  
SFO2 300.1312005 MHz

F2 - Processing parameters  
SI 65536  
SF 75.4677490 MHz  
WDW EM  
SSB 0  
LB 1.00 Hz  
GB 0  
PC 1.40

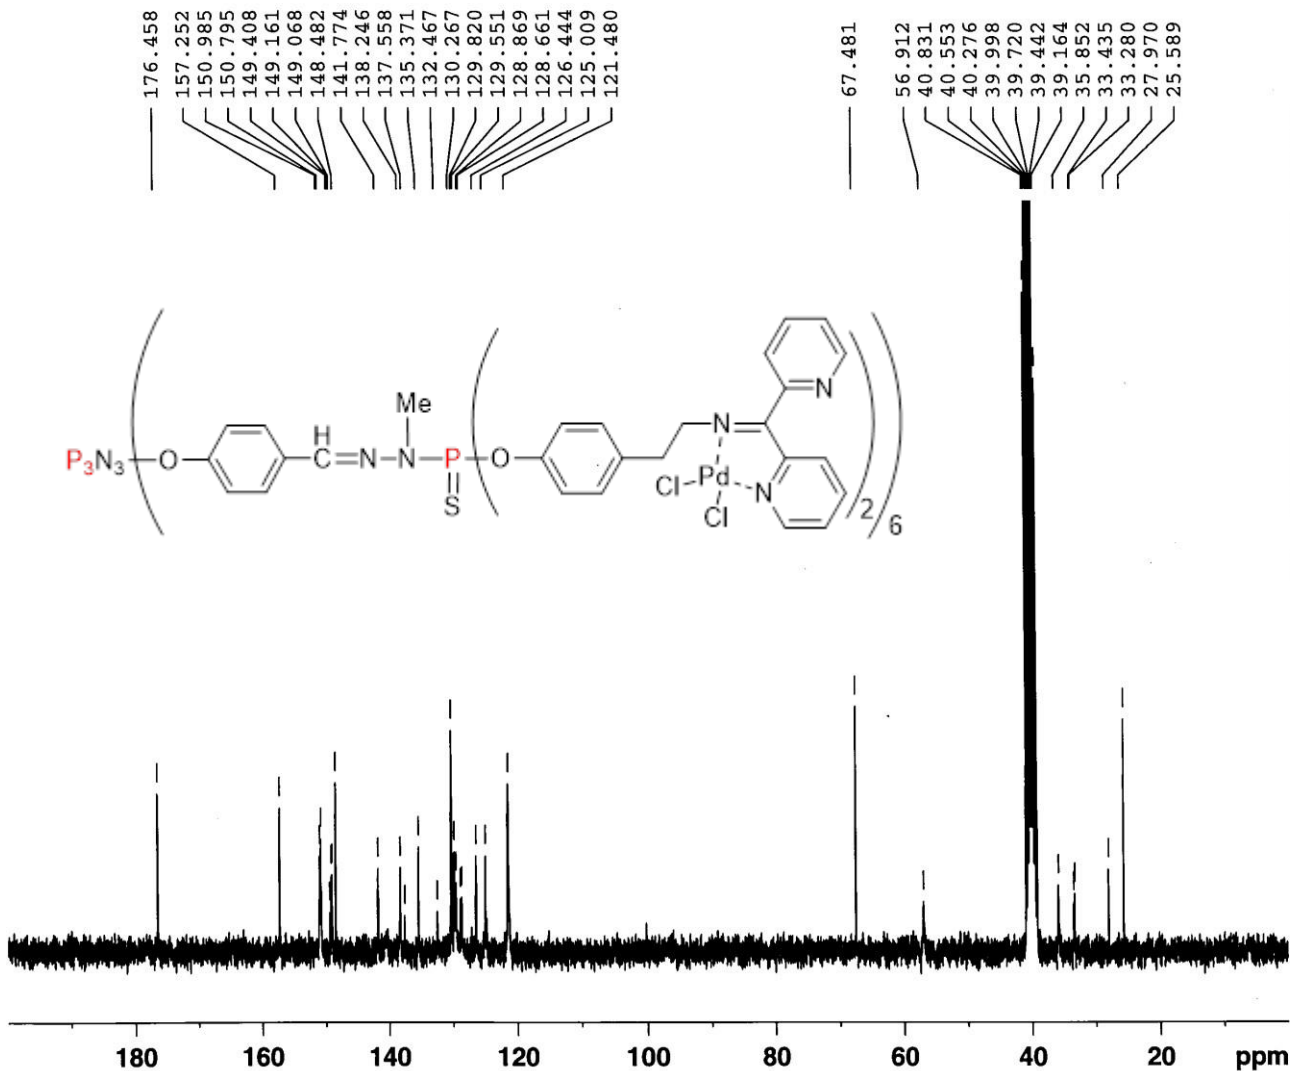

<sup>13</sup>

C JMOD NMR of dendrimer 3-G<sub>1</sub>-Pd<sub>12</sub>

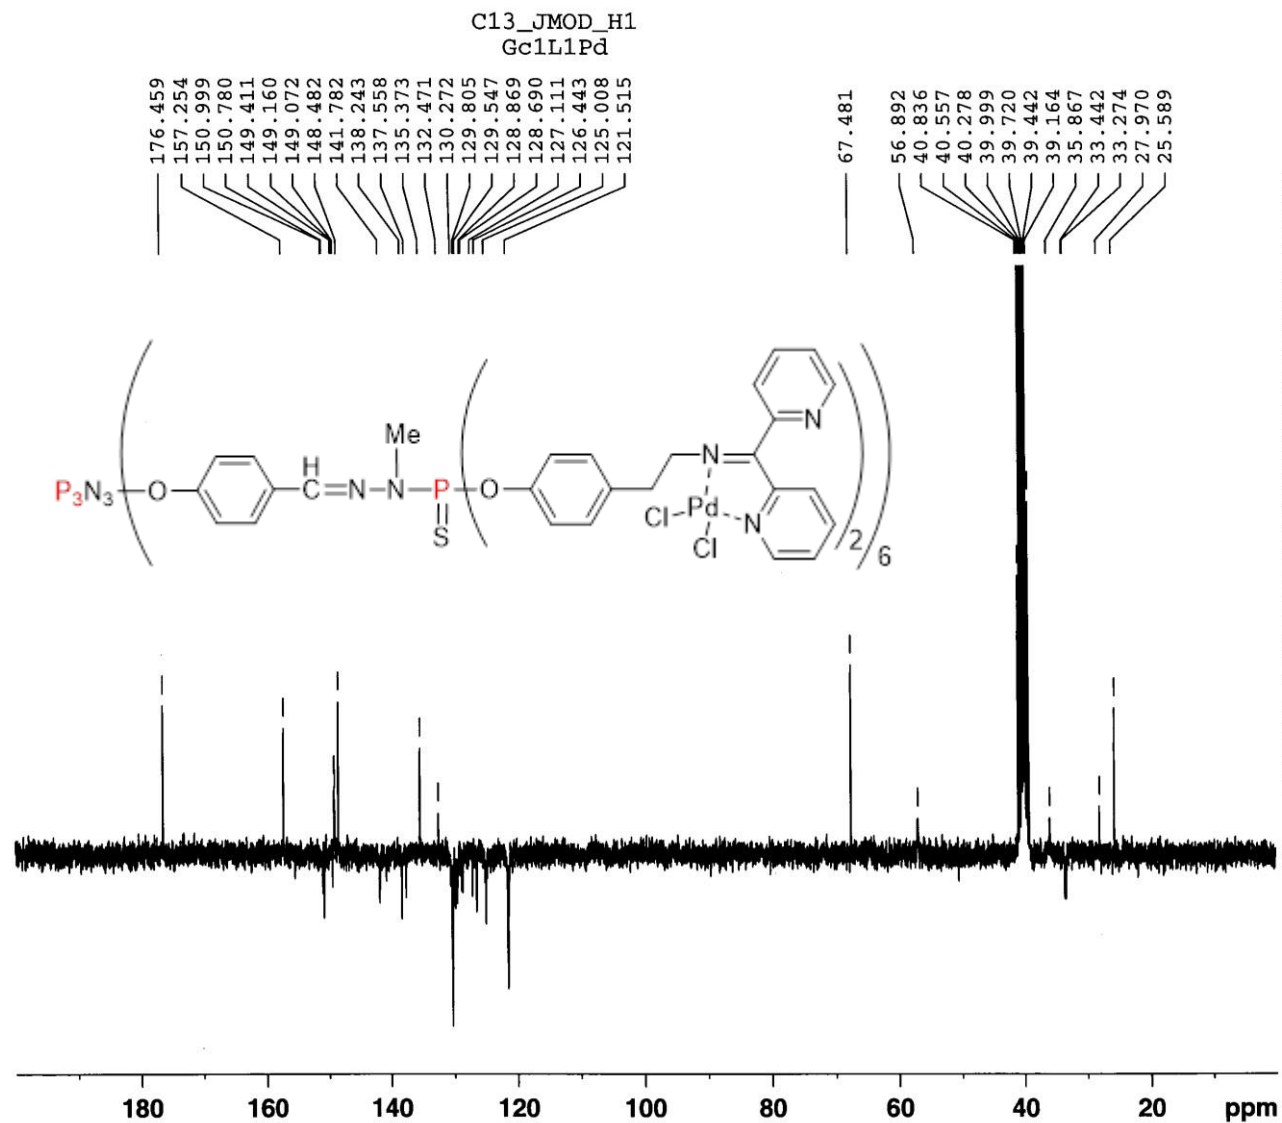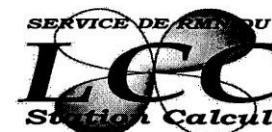

Current Data Parameters  
 NAME hmfC0096  
 EXPNO 5  
 PROCNO 1  
 USER majoral

F2 - Acquisition Parameters  
 Date\_ 20080430  
 Time 7.35  
 INSTRUM spect  
 PROBHD 5 mm TXO 31P/1  
 PULPROG ls\_jmod  
 TD 65536  
 SOLVENT DMSO  
 NS 7000  
 DS 4  
 SWH 18115.941 Hz  
 FIDRES 0.276427 Hz  
 AQ 1.8088436 sec  
 RG 29193  
 DW 27.600 usec  
 DE 10.00 usec  
 TE 297.9 K  
 CNST2 145.000000  
 CNST11 1.000000  
 D1 2.00000000 sec  
 d20 0.00689655 sec  
 DELTA 0.00000917 sec  
 MCREST 0.00000000 sec  
 MCWRK 0.01500000 sec

===== CHANNEL f1 =====  
 NUC1 13C  
 P1 7.20 usec  
 p2 14.40 usec  
 PL1 -6.00 dB  
 SFO1 75.4752958 MHz

===== CHANNEL f2 =====  
 CPDPRG2 waltz16  
 NUC2 1H  
 PCPD2 89.00 usec  
 PL2 -2.00 dB  
 PL12 17.00 dB  
 SFO2 300.1312005 MHz

F2 - Processing parameters  
 SI 65536  
 SF 75.4677490 MHz  
 WDW EM  
 SSB 0  
 LB 1.00 Hz  
 GB 0  
 PC 1.40



<sup>13</sup>

**C HMQC NMR of dendrimer 3-G<sub>1</sub>-Pd<sub>12</sub>**

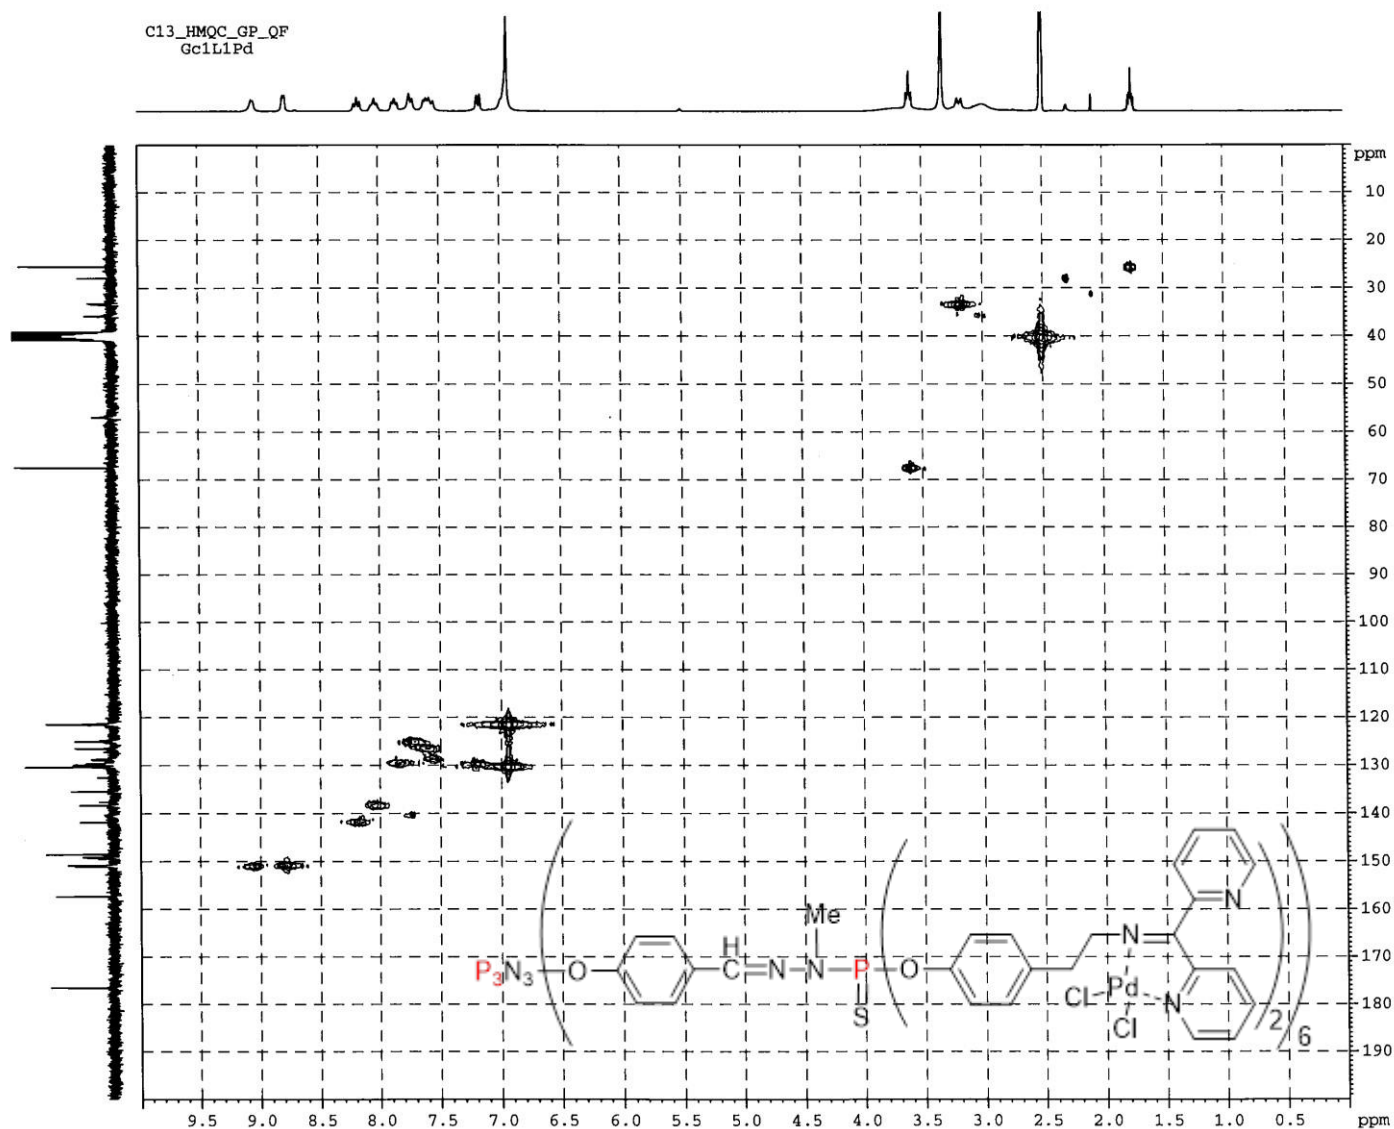

```

Current Data Parameters
NAME          hmfC0096
EXPNO         6
PROCNO        1
USER          majo21al

F2 - Acquisition Parameters
Date_         20080410
Time          7:37
INSTRUM       spect
FREQID        5 mm TEO 219.71
PULPROG       lg_hmqcpqrf
SOLVENT       DMSO
NS             8
DS            16
SWH           5411.255 Hz
FIDRES        1.370107 Hz
AQ            0.3785204 sec
RG            256
SW            92.400 usec
DE            10.00 usec
TE            297.9 K
CNS2T2        145.000000 sec
D1            2.0000000 sec
D2            0.0034448 sec
D3            0.0000200 sec
D4            0.0000400 sec
D16           0.0002040 sec
UNRES1        0.0002200 Hz
INQ           0.0002760 sec
MCKRET        0.0000000 sec
MCKRNF        2.0000000 sec

===== CHANNEL f1 =====
NUC1          1H
P1            10.20 usec
p2            20.40 usec
FL1           -2.00 dB
SP1           300.131806 MHz

===== CHANNEL f2 =====
CPRG02        gprb
NUC2          13C
P3            8.50 usec
PL2           -6.00 dB
PL12          16.90 dB
SP12          75.47558 MHz

===== GRADIENT CHANNEL =====
GPMN1         SINE.100 Hz
GPMN2         SINE.100 Hz
GPMN3         SINE.100 Hz
GPN1          0.00 %
GPN2          0.00 %
GPN3          0.00 %
GPN4          0.00 %
GPN5          0.00 %
GPN6          50.00 %
GPN7          30.00 %
GPN8          30.00 %
P16           10.000 usec

F1 - Acquisition parameters
ND0           256
SP01          75.4753 MHz
FIDRES        70.76314 Hz
SW            240.025 ppm
PNAMEC       QP

F2 - Processing parameters
SI            4096
SF            300.131806 MHz
WDW           QNINE
SSB           2
GB            0.00 Hz
LB            0
PC            1.40

F1 - Processing parameters
SI            4096
MC2           QP
SF            75.47571490 MHz
WDW           QNINE
SSB           2
LB            0
PC            0

```

$\{^1\text{H}\}$  NMR of dendrimer 3

$^{31}\text{P}$

-G<sub>2</sub>-Pd<sub>24</sub>

P31\_DECOUPLE\_H1  
Gc2L1-Pd

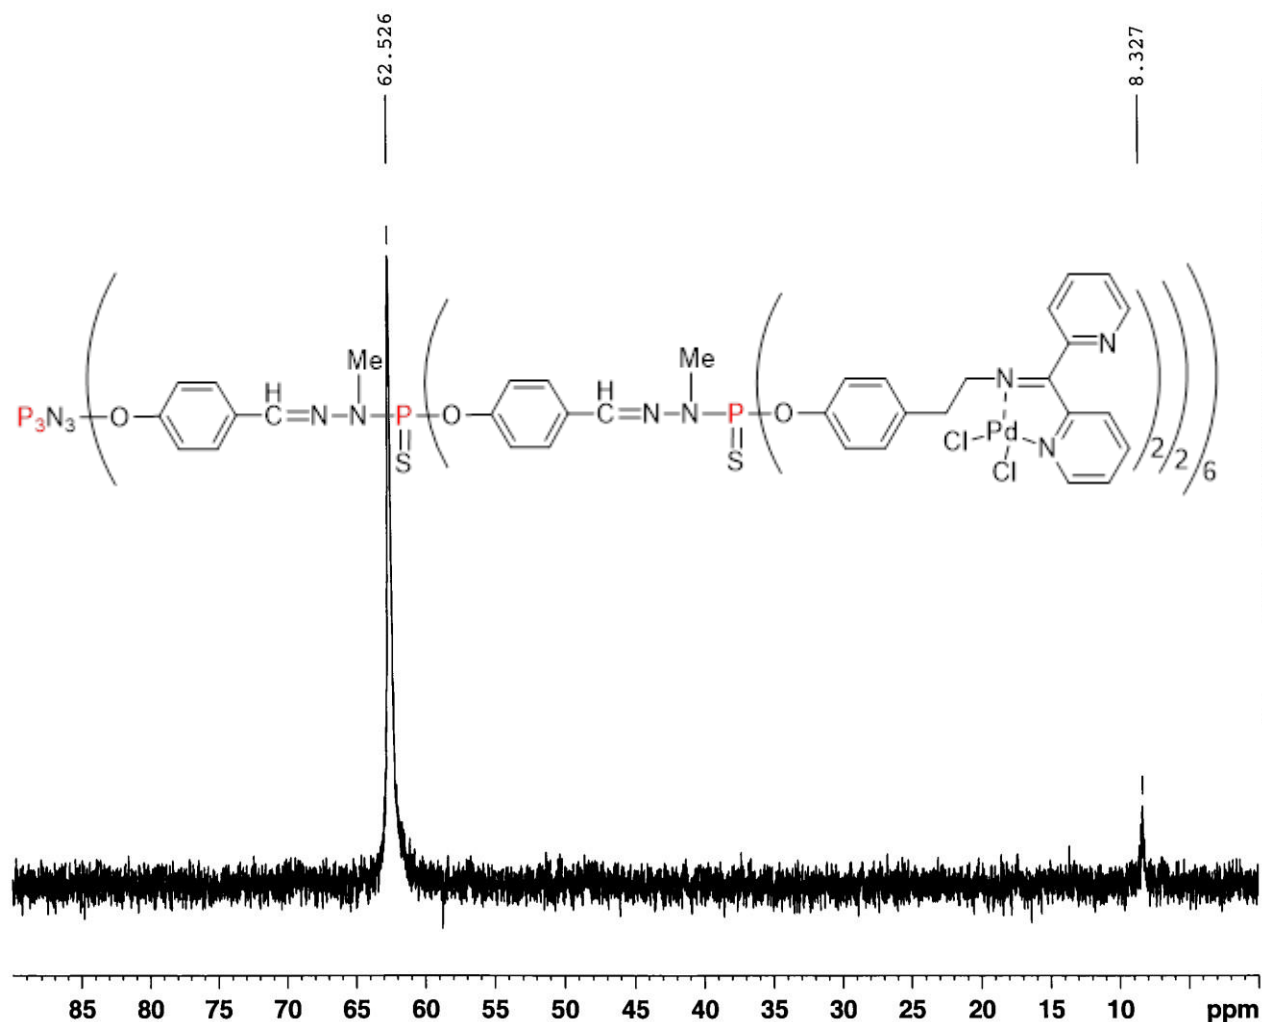

SERVICE DE RMN DU  
**LCC**  
Station Calcul

Current Data Parameters  
NAME hmfC0099  
EXPNO 2  
PROCNO 1  
USER majoral

F2 - Acquisition Parameters  
Date\_ 20080430  
Time 18.42  
INSTRUM spect  
PROBHD 5 mm TXO 31P/1  
PULPROG ls\_zg60dc  
TD 65536  
SOLVENT DMSO  
NS 1030  
DS 4  
SWH 36496.352 Hz  
FIDRES 0.556890 Hz  
AQ 0.8978932 sec  
RG 36780.8  
DW 13.700 usec  
DE 10.00 usec  
TE 297.9 K  
D1 1.00000000 sec  
d11 0.03000000 sec  
MCREST 0.00000000 sec  
MCWRK 0.01500000 sec

===== CHANNEL f1 =====  
NUC1 31P  
P1 8.80 usec  
PL1 0.00 dB  
SFO1 121.4948510 MHz

===== CHANNEL f2 =====  
CPDPRG2 waltz16  
NUC2 1H  
PCPD2 89.00 usec  
PL2 -2.00 dB  
PL12 17.00 dB  
SFO2 300.1312005 MHz

F2 - Processing parameters  
SI 65536  
SF 121.4948510 MHz  
WDW EM  
SSB 0  
LB 1.00 Hz  
GB 0  
PC 1.40

**$^1\text{H}$  NMR of dendrimer 3-G<sub>2</sub>-Pd<sub>24</sub>**

**<sup>1</sup>H} NMR of dendrimer 3**

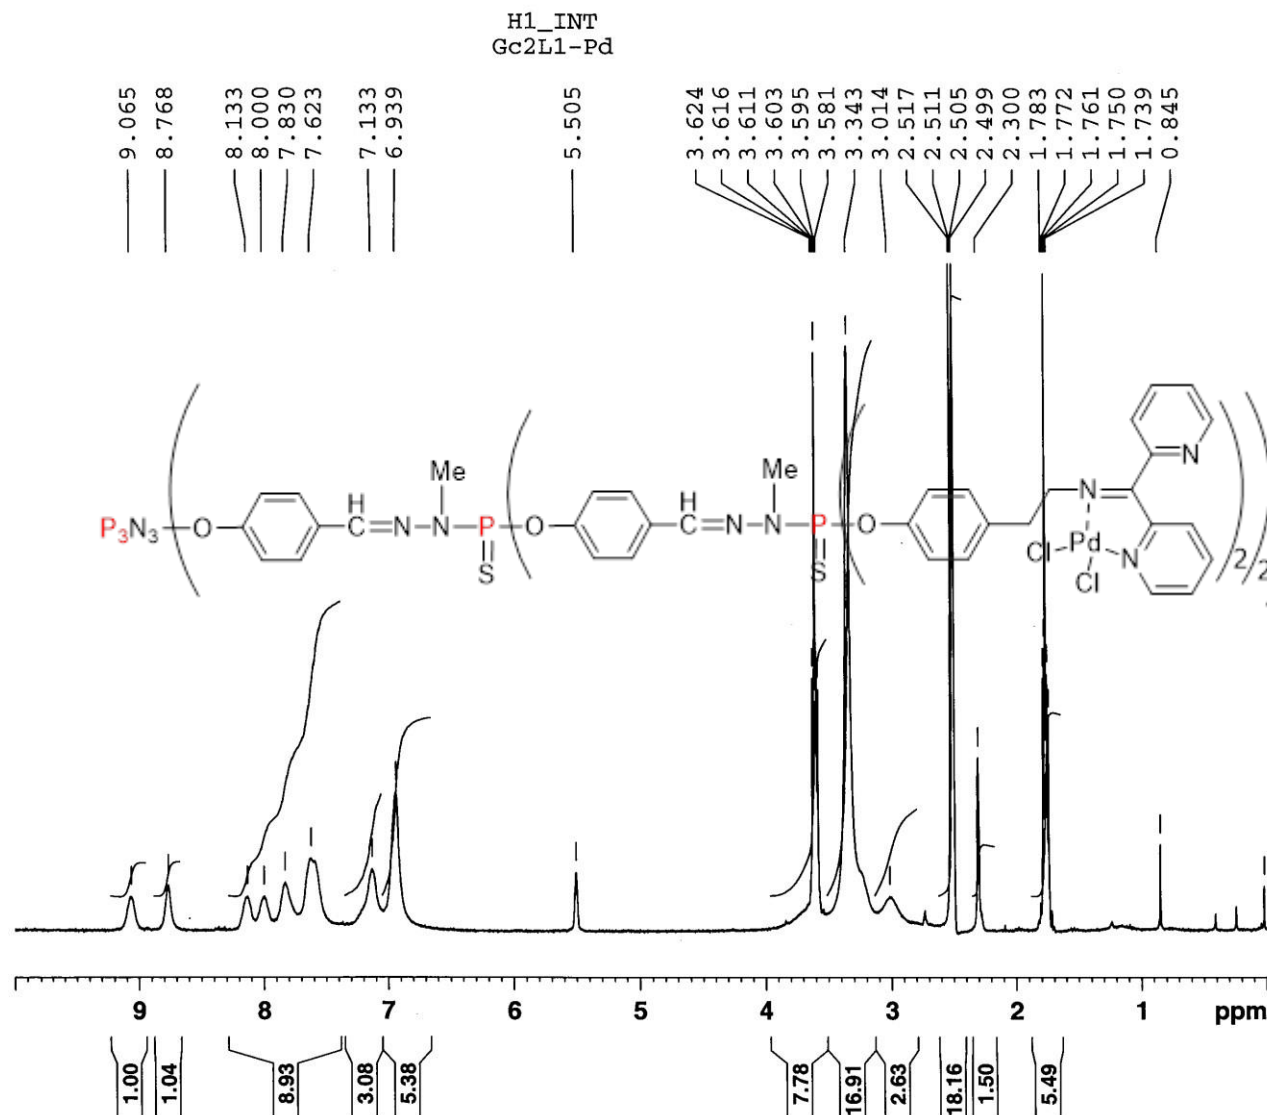

SERVICE DE RMN DU  
**LCC**  
Station Calcul

Current Data Parameters  
NAME hmfC0099  
EXPNO 1  
PROCNO 1  
USER majoral

F2 - Acquisition Parameters  
Date\_ 20080430  
Time 18.29  
INSTRUM spect  
PROBHD 5 mm TXO 31P/1  
PULPROG ls\_zg60  
TD 32768  
SOLVENT DMSO  
NS 8  
DS 2  
SWH 5411.255 Hz  
FIDRES 0.165138 Hz  
AQ 3.0278132 sec  
RG 256  
DW 92.400 usec  
DE 10.00 usec  
TE 298.0 K  
DT 10.00000000 sec  
MCREST 0.00000000 sec  
MCWRK 0.01500000 sec

===== CHANNEL f1 =====  
NUC1 1H  
P1 10.20 usec  
PL1 -2.00 dB  
SFO1 300.1318008 MHz

F2 - Processing parameters  
SI 32768  
SF 300.1300000 MHz  
WDW EM  
SSB 0  
LB 0.10 Hz  
GB 0  
PC 1.40

$^{13}\text{C}$

$-\text{G}_2-\text{Pd}_{24}$

{<sup>1</sup>H} NMR of dendrimer 3

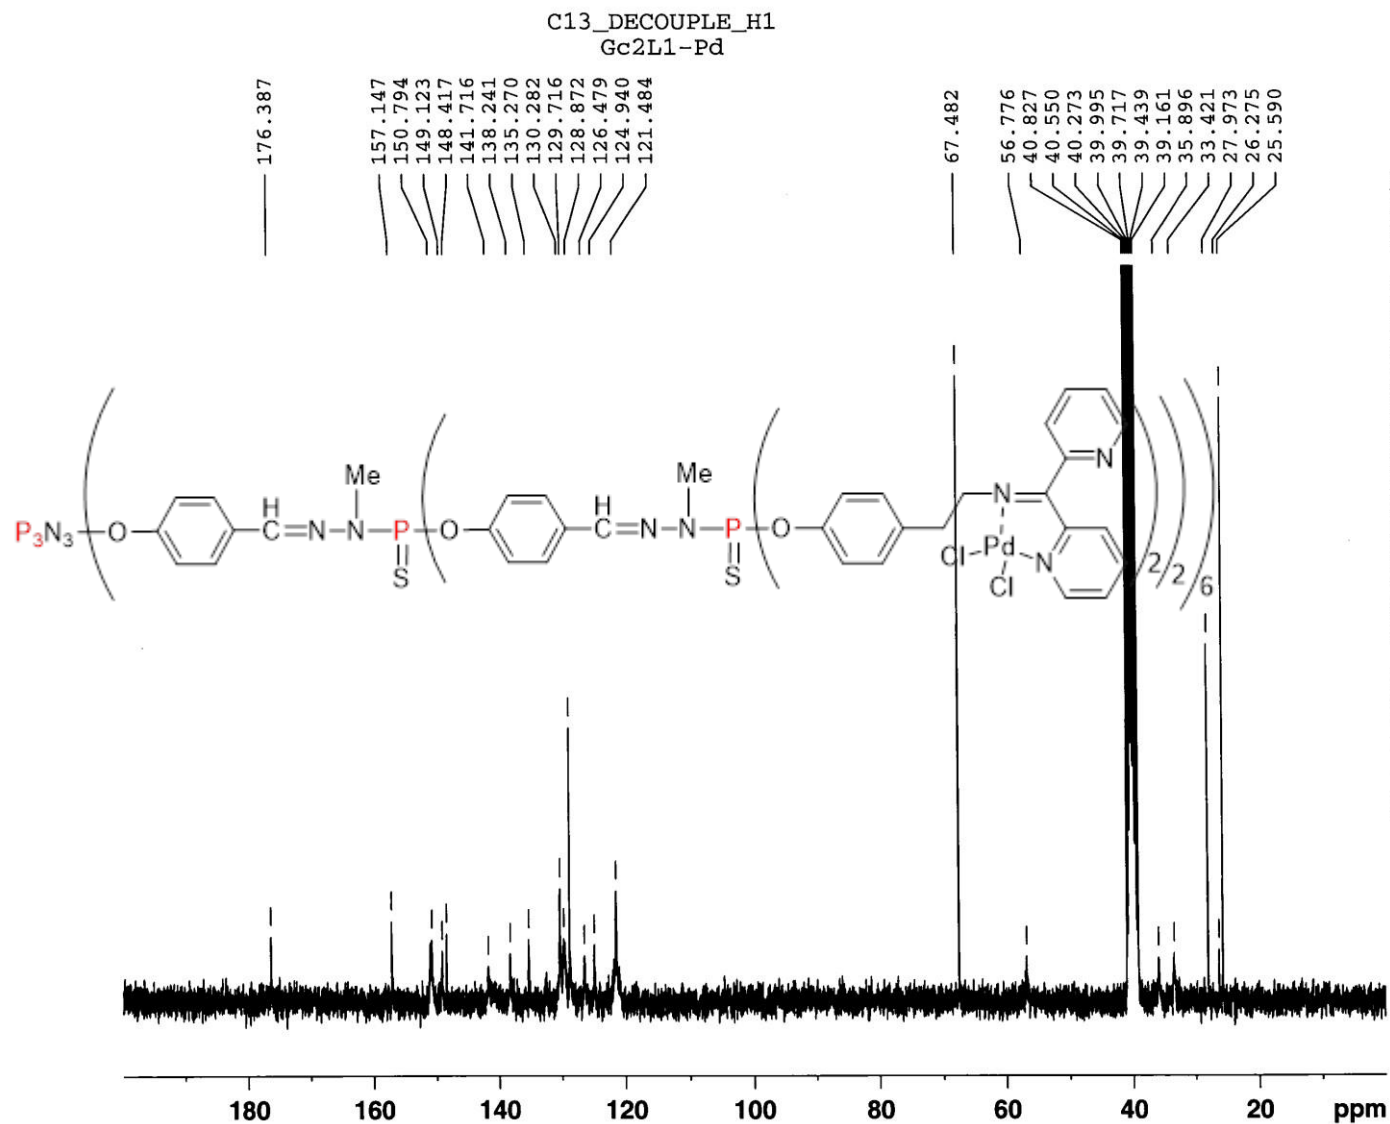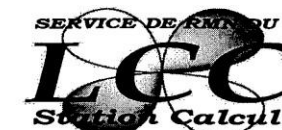

Current Data Parameters  
NAME hmfC0099  
EXPNO 3  
PROCNO 1  
USER majoral

F2 - Acquisition Parameters  
Date\_ 20080501  
Time 10.37  
INSTRUM spect  
PROBHD 5 mm TXO 31P/1  
PULPROG ls\_zg60dc  
TD 65536  
SOLVENT DMSO  
NS 19200  
DS 4  
SWH 18115.941 Hz  
FIDRES 0.276427 Hz  
AQ 1.8088436 sec  
RG 29193  
DW 27.600 usec  
DE 10.00 usec  
TE 297.9 K  
D1 1.00000000 sec  
d11 0.03000000 sec  
MCREST 0.00000000 sec  
MCWRK 0.01500000 sec

===== CHANNEL f1 =====  
NUC1 13C  
P1 7.20 usec  
PL1 -6.00 dB  
SFO1 75.4752958 MHz

===== CHANNEL f2 =====  
CPDPRG2 waltz16  
NUC2 1H  
PCPD2 89.00 usec  
PL2 -2.00 dB  
PL12 17.00 dB  
SFO2 300.1312005 MHz

F2 - Processing parameters  
SI 65536  
SF 75.4677490 MHz  
WDW EM  
SSB 0  
LB 1.00 Hz  
GB 0  
PC 1.40

$^{13}\text{C}$  JMOD NMR of dendrimer 3-G<sub>2</sub>-Pd<sub>24</sub>



$\{^1\text{H}\}$  NMR of dendrimer 3

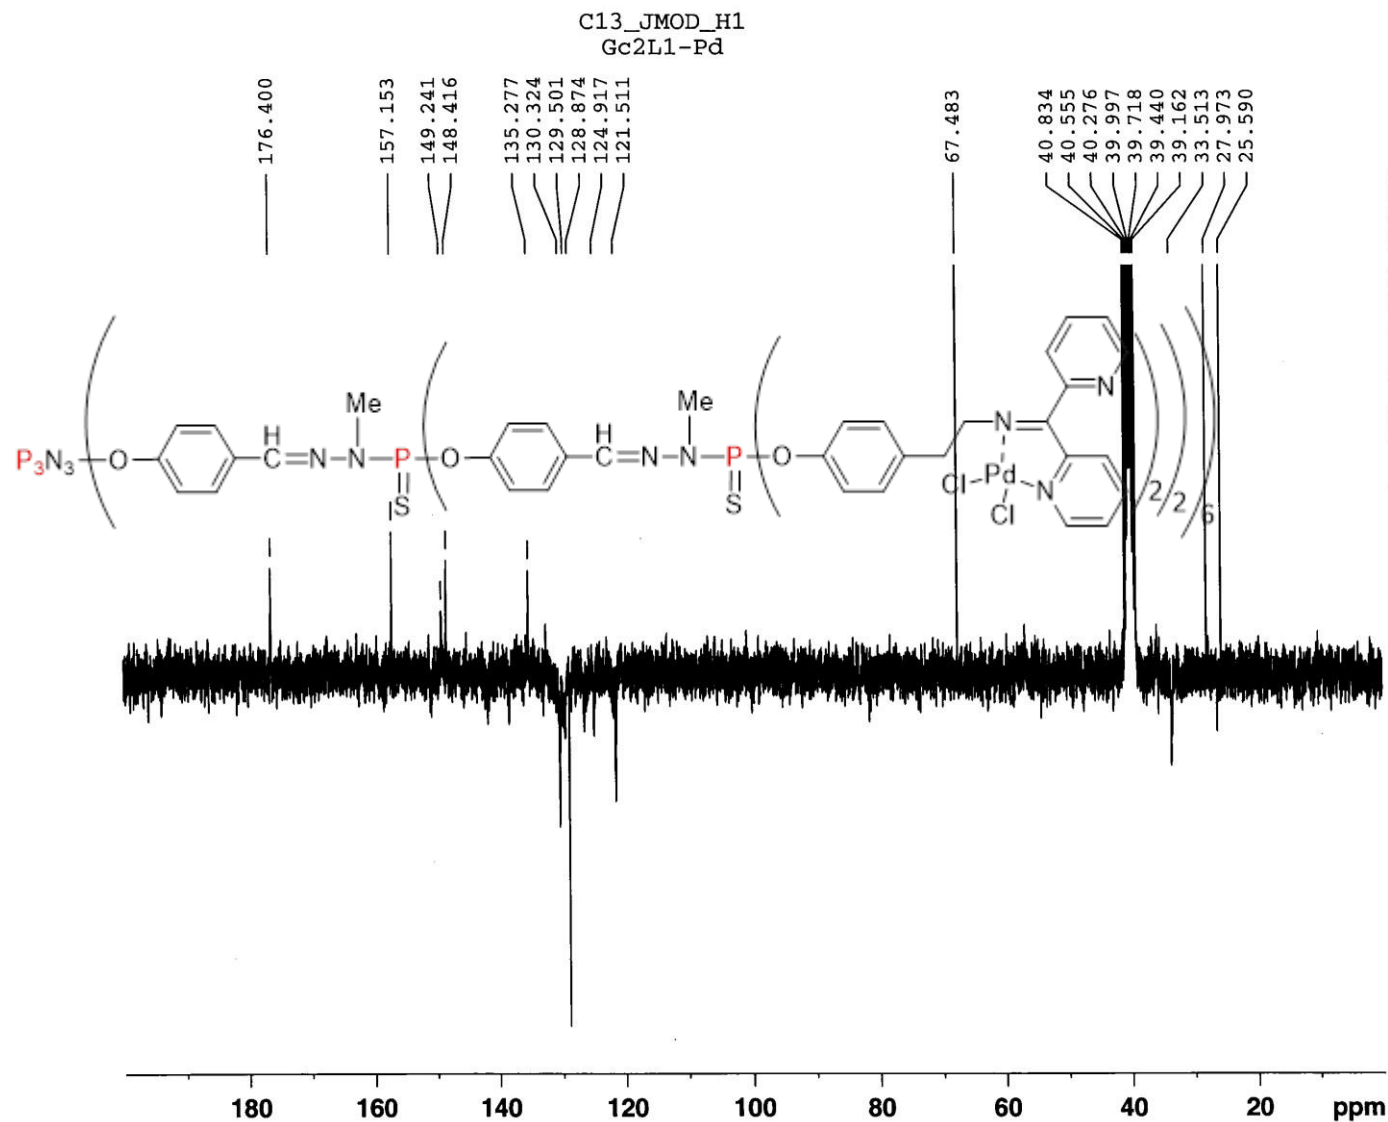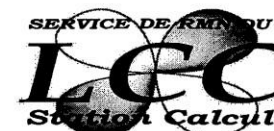

Current Data Parameters  
NAME hmfC0099  
EXPNO 4  
PROCNO 1  
USER majoral

F2 - Acquisition Parameters  
Date\_ 20080502  
Time 8.03  
INSTRUM spect  
PROBHD 5 mm TXO 31P/1  
PULPROG ls\_jmod  
TD 65536  
SOLVENT DMSO  
NS 20000  
DS 4  
SWH 18115.941 Hz  
FIDRES 0.276427 Hz  
AQ 1.8088436 sec  
RG 29193  
DW 27.600 usec  
DE 10.00 usec  
TE 297.9 K  
CNST2 145.0000000  
CNST11 1.0000000  
D1 2.00000000 sec  
d20 0.00689655 sec  
DELTA 0.00000917 sec  
MCREST 0.00000000 sec  
MCWRK 0.01500000 sec

===== CHANNEL f1 =====  
NUC1 13C  
P1 7.20 usec  
p2 14.40 usec  
PL1 -6.00 dB  
SFO1 75.4752958 MHz

===== CHANNEL f2 =====  
CPDPRG2 waltz16  
NUC2 1H  
PCPD2 89.00 usec  
PL2 -2.00 dB  
PL12 17.00 dB  
SFO2 300.1312005 MHz

F2 - Processing parameters  
SI 65536  
SF 75.4677490 MHz  
WDW EM  
SSB 0  
LB 1.00 Hz  
GB 0  
PC 1.40

$^{31}\text{P}$

-G<sub>3</sub>-Pd<sub>48</sub>

**{<sup>1</sup>H} NMR of dendrimer 3**

P31\_DECOUPLE\_H1  
Gc3L1-Pd

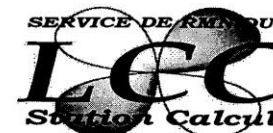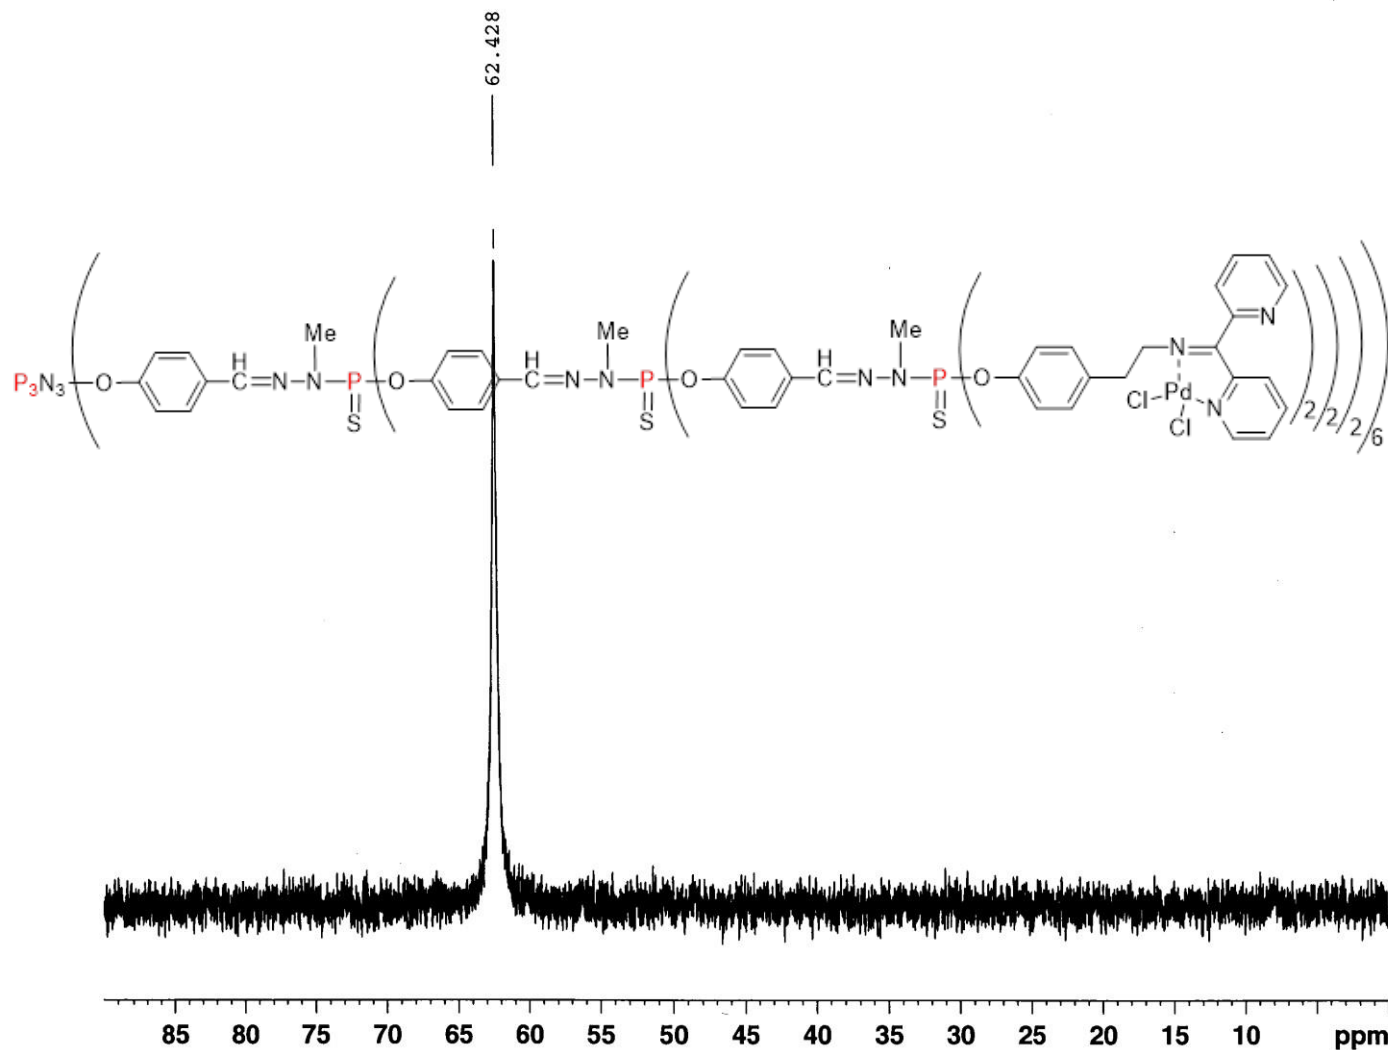

Current Data Parameters  
NAME hmfC0102  
EXPNO 3  
PROCNO 1  
USER majoral

F2 - Acquisition Parameters  
Date\_ 20080507  
Time 20.03  
INSTRUM spect  
PROBHD 5 mm TXO 31P/1  
PULPROG ls\_zg60dc  
TD 65536  
SOLVENT DMSO  
NS 2000  
DS 4  
SWH 36496.352 Hz  
FIDRES 0.556890 Hz  
AQ 0.8978932 sec  
RG 36780.8  
DW 13.700 usec  
DE 10.00 usec  
TE 297.9 K  
D1 1.00000000 sec  
d11 0.03000000 sec  
MCREST 0.00000000 sec  
MCWRK 0.01500000 sec

===== CHANNEL f1 =====  
NUC1 31P  
P1 8.80 usec  
PL1 0.00 dB  
SFO1 121.4948510 MHz

===== CHANNEL f2 =====  
CPDPRG2 waltz16  
NUC2 1H  
PCPD2 89.00 usec  
PL2 -2.00 dB  
PL12 17.00 dB  
SFO2 300.1312005 MHz

F2 - Processing parameters  
SI 65536  
SF 121.4948510 MHz  
WDW EM  
SSB 0  
LB 1.00 Hz  
GB 0  
PC 1.40

**$^1\text{H}$  NMR of dendrimer 3-G<sub>3</sub>-Pd<sub>48</sub>**

<sup>1</sup>H} NMR of dendrimer 3

H1\_INT  
Gc3L1-Pd

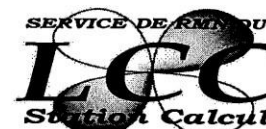

Current Data Parameters  
NAME hmfC0102  
EXPNO 2  
PROCNO 1  
USER majoral

F2 - Acquisition Parameters  
Date\_ 20080507  
Time 18.51  
INSTRUM spect  
PROBHD 5 mm TXO 31P/1  
PULPROG ls\_zg60  
TD 32768  
SOLVENT DMSO  
NS 8  
DS 2  
SWH 5411.255 Hz  
FIDRES 0.165138 Hz  
AQ 3.0278132 sec  
RG 287.4  
DW 92.400 usec  
DE 10.00 usec  
TE 298.0 K  
D1 10.00000000 sec  
MCREST 0.00000000 sec  
MCWRK 0.01500000 sec

===== CHANNEL f1 =====  
NUC1 1H  
P1 10.20 usec  
PL1 -2.00 dB  
SFO1 300.1318008 MHz

F2 - Processing parameters  
SI 32768  
SF 300.1300000 MHz  
WDW EM  
SSB 0  
LB 0.10 Hz  
GB 0  
PC 1.40

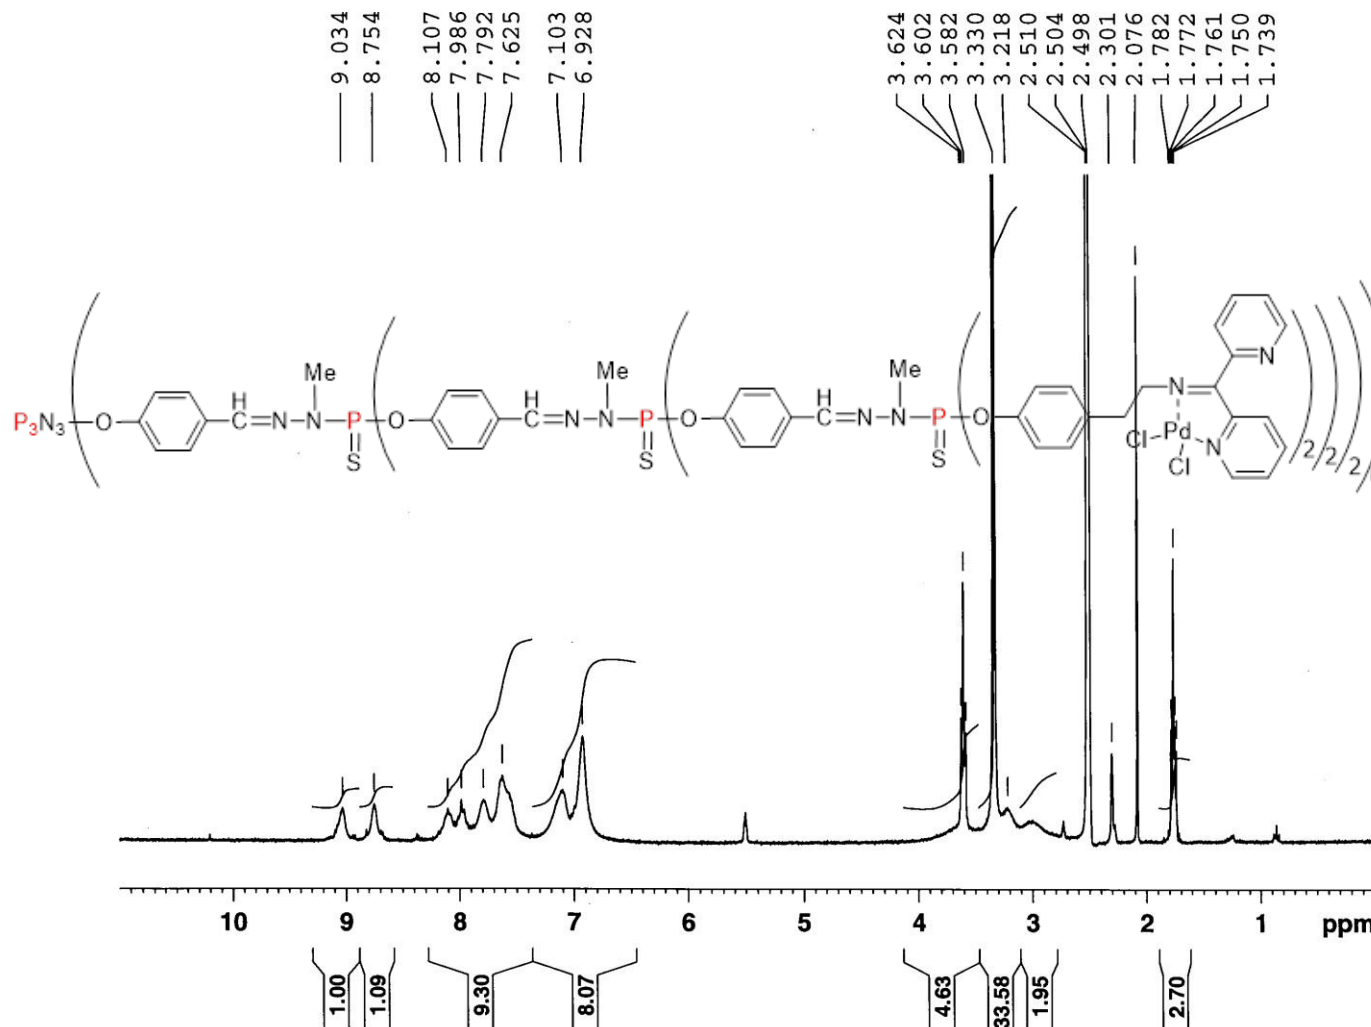

$\{^1\text{H}\}$  NMR of  
 $^{13}\text{C}$  dendrimer 3- $\text{G}_3\text{-Pd}_{48}$

**$\{^1\text{H}\}$  NMR of**

C13\_DECOUPLE\_H1  
Gc3L1-Pd

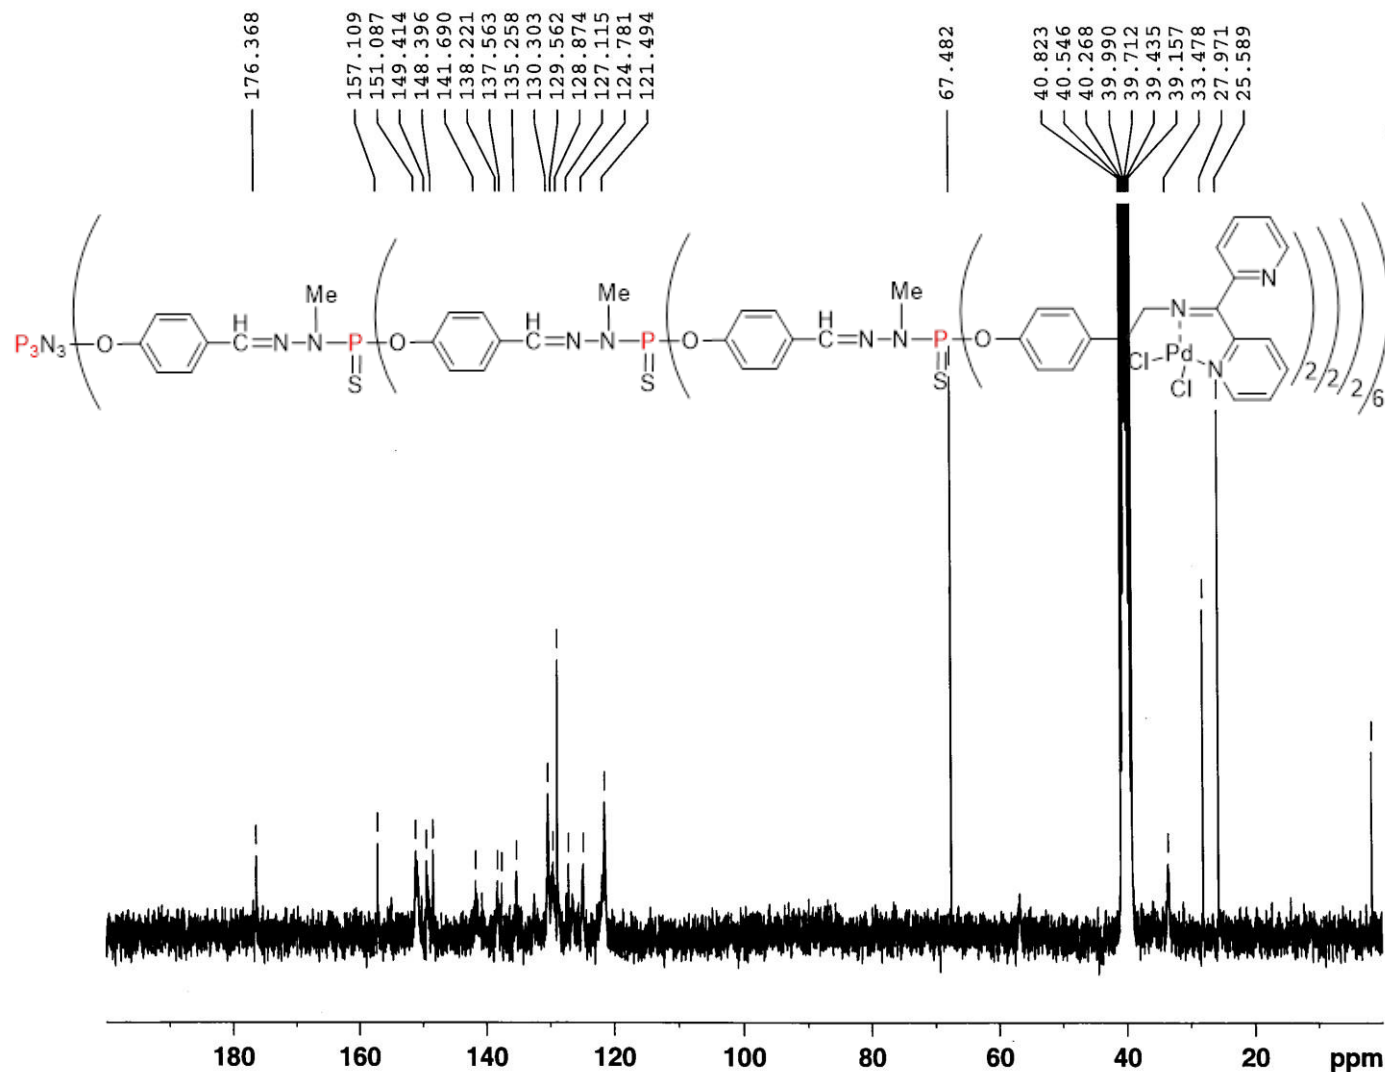

SERVICE DE RMN DU  
**LCC**  
Station Calcul

```
Current Data Parameters
NAME          hmfC0102
EXPNO         4
PROCNO        1
USER          majoral
```

F2 - Acquisition Parameters

```

Date_                20080509
Time                 7.49
INSTRUM              spect
PROBHD              5 mm TXO 31P/1
PULPROG              1s_zg60dc
TD                   65536
SOLVENT              DMSO
NS                   4800
DS                   4
6 SWH                18115.941 Hz
FIDRES              0.276427 Hz
AQ                  1.8088436 sec
RG                  16384
DW                  27.600 usec
DE                  10.00 usec
TE                  297.9 K
D1                  1.00000000 sec
d11                 0.03000000 sec
MCREST              0.05000000 sec
MCWRK               0.01500000 sec

```

```
===== CHANNEL f1 =====
NUC1          13C
P1             7.20 usec
PL1           -6.00 dB
SFO1         75.4752958 MHz
```

```
===== CHANNEL f2 =====
CPDPRG2          waltz16
NUC2              1H
PCPD2             89.00 usec
PL2              -2.00 dB
PL12             17.00 dB
SFO2             300.1312005 MHz
```

```
F2 - Processing parameters
SI                65536
SF                75.4677490 MHz
WDW               EM
SSB               0
LB                1.00 Hz
GB                0
PC                1.40
```
